# Supplementary material
Source: Research Square preprint supplement (doi:10.21203/rs.3.rs-10032042/v1)
Supplement: Supplementary file 1 [file 27a15df38284af181c32e281.xlsx]

## Sheet: Sheet1
Supplementary Table S1. List of MSI identified metabolites in Berberis honey (BH) based on UHPLC-MS/MS non-targeted metabolomics.
MS2_name	MS2_score	mz	rt	Formula	Ion Mode	Peak Area
Undecanoic acid	3.99	185.155	494.3	C11H22O2	NEG	9.45077e+07
10-Undecenoic acid	3.99	183.139	469.9	C11H20O2	NEG	2.09513e+07
2-Hydroxyoctanoic acid	3.99	159.103	374.6	C8H16O3	NEG	5.27198e+07
2'-O-Methyluridine	3.99	257.078	105.1	C10H14N2O6	NEG	1.71622e+07
[(2S,3R,4S,5S,6R)-3,4,5-trihydroxy-6-(hydroxymethyl)oxan-2-yl] 4-prop-1-en-2-ylcyclohexene-1-carboxylate	3.99	327.145	49.1	C16H24O7	NEG	1.17844e+07
(1R,2R,6R,9R)-2,11,11-trimethyl-3-oxo-tricyclo[4.3.2.01,5]undecane-9-carboxylic acid	3.99	249.15	47.1	C15H22O3	NEG	6.09986e+06
Quercetin	3.98	303.05	346.4	C15H10O7	POS	4.05469e+07
cis-11.14-Eicosadienoic acid	3.98	307.264	572.2	C20H36O2	NEG	6.45805e+06
Oleic acid	3.98	281.249	568.5	C18H34O2	NEG	2.97742e+08
trans-Vaccenic acid	3.98	281.249	568.5	C18H34O2	NEG	2.97742e+08
cis-8,11,14-Eicosatrienoic acid	3.98	305.249	555.7	C20H34O2	NEG	2.19287e+07
Linoleic acid	3.98	279.233	550.2	C18H32O2	NEG	1.62791e+09
cis-9-Palmitoleic acid	3.98	253.217	545.2	C16H30O2	NEG	1.19852e+09
Continentalic acid	3.98	301.217	542.2	C20H30O2	NEG	1.80334e+08
(1S,4aR,10aR)-1,4a,7-trimethyl-7-vinyl-3,4,4b,5,6,9,10,10a-octahydro-2H-phenanthrene-1-carboxylic acid	3.98	301.217	542.2	C20H30O2	NEG	1.80334e+08
Myristic acid	3.98	227.202	541.8	C14H28O2	NEG	2.0584e+09
(E)-5-(1,2,4a,5-tetramethyl-2,3,4,7,8,8a-hexahydronaphthalen-1-yl)-3-methyl-pent-2-enoic acid	3.98	303.233	540.8	C20H32O2	NEG	3.73007e+06
2-methyl-2-(4-methylpent-3-enyl)-7-pentyl-chromen-5-ol	3.98	313.217	534.1	C21H30O2	NEG	1.05895e+08
alpha-Linolenic acid	3.98	277.217	533.1	C18H30O2	NEG	4.97177e+09
2-Hydroxypalmitic acid	3.98	271.228	517.8	C16H32O3	NEG	1.41242e+07
Stearidonic acid	3.98	275.202	517.8	C18H28O2	NEG	8.26108e+07
(E)-5-(2,3-dimethyl-3-tricyclo[2.2.1.02,6]heptanyl)-2-methyl-pent-2-enoic acid	3.98	233.155	495.2	C15H22O2	NEG	1.78966e+07
16-Hydroxypalmitic acid	3.98	271.228	477.6	C16H32O3	NEG	1.9514e+09
7-(1-hydroxy-1-methyl-ethyl)-1,4a-dimethyl-2,3,4,9,10,10a-hexahydrophenanthrene-1-carboxylic acid	3.98	315.197	430.7	C20H28O3	NEG	422315
Formylanthranilic acid	3.98	164.035	281.5	C8H7NO3	NEG	9.9095e+07
ESCULETIN	3.98	177.019	272.9	C9H6O4	NEG	2.05951e+08
2-Ketocaproic acid	3.98	129.056	267.7	C6H10O3	NEG	9.29035e+06
3,4-Dihydroxyphenylacetic acid	3.98	149.024	212.8	C8H8O4	NEG	1.6484e+07
Methylsuccinic acid	3.98	131.035	138.3	C5H8O4	NEG	1.62314e+07
Glutaric acid	3.98	131.035	94.6	C5H8O4	NEG	2.35204e+07
Terephthalic-Acid	3.98	165.019	369.3	C8H6O4	NEG	2.38122e+07
5-Hydroxyvalproic acid	3.98	159.102	162.5	C8H16O3	NEG	2.1993e+09
2-Hydroxy-2-methylbutyric acid	3.98	117.056	154.5	C5H10O3	NEG	8.18725e+07
12-Hydroxystearic acid	3.98	299.259	49.4	C18H36O3	NEG	1.29073e+08
9-Oxo-10(E),12(E)-octadecadienoic acid	3.98	293.212	46.8	C18H30O3	NEG	5.84476e+07
Embelin	3.98	293.175	36.9	C17H26O4	NEG	1.97681e+08
Pinobanksin	3.98	271.061	36.7	C15H12O5	NEG	2.40359e+09
cis-​9,​10-​Epoxystearic acid	3.98	297.243	36.4	C18H34O3	NEG	1.91681e+08
9-Oxooctadecanoic acid	3.98	297.243	36.4	C18H34O3	NEG	1.91681e+08
Palmitic acid	3.98	255.233	35.3	C16H32O2	NEG	1.86163e+09
Heptadecanoic acid	3.98	269.249	35.3	C17H34O2	NEG	1.249e+07
4-Hydroxybenzaldehyde	3.98	121.029	33.6	C7H6O2	NEG	5.6283e+07
5,7-dihydroxy-2-phenyl-chroman-4-one	3.98	255.066	32.9	C15H12O4	NEG	1.97636e+09
2,2-Dimethyl-3,4-dihydro-2H-1,4-benzoxazin-3-one	3.98	176.072	32.6	C10H11NO2	NEG	3.96124e+07
Cholesteryl sulfate	3.98	465.304	23.3	C27H46O4S	NEG	8.22868e+07
octadecyl hydrogen sulfate	3.98	349.241	22.6	C18H38O4S	NEG	1.65458e+08
gamma-Linolenic acid	3.97	277.217	533.1	C18H30O2	NEG	4.97177e+09
3,7-Di-O-methylquercetin	3.97	331.081	389.6	C17H14O7	POS	1.3494e+08
Kaempferol	3.97	287.055	370.4	C15H10O6	POS	5.31092e+08
Isorhamnetin-3-O-neohespeidoside	3.97	625.176	293.1	C28H32O16	POS	9.45833e+07
5,7-dihydroxy-2-(4-hydroxy-3-methoxy-phenyl)-3-[3,4,5-trihydroxy-6-[[(2R,3R,4R,5R,6S)-3,4,5-trihydroxy-6-methyl-tetrahydropyran-2-yl]oxymethyl]tetrahydropyran-2-yl]oxy-chromen-4-one	3.97	625.176	293.1	C28H32O16	POS	9.45833e+07
Epinastine	3.97	250.133	282.1	C16H15N3	POS	1.57772e+08
PG(18:1/18:1(9Z))	3.97	773.535	638	C42H79O10P	NEG	2.25518e+06
Methyl pentadecanoate	3.97	255.233	565.9	C16H32O2	NEG	1.79899e+08
Pentadecanoic acid	3.97	241.217	554.9	C15H30O2	NEG	1.8012e+08
3-Epiursolic Acid	3.97	455.354	528.4	C30H48O3	NEG	1.25082e+06
LPE(18:1(9Z)/0:0)	3.97	478.294	521.7	C23H46NO7P	NEG	2.39292e+06
LPE(16:0)	3.97	452.279	517.4	C21H44NO7P	NEG	2.77499e+06
Dodecanoic acid	3.97	199.17	511.6	C12H24O2	NEG	9.33459e+08
13(S)-HODE	3.97	295.228	480.5	C18H32O3	NEG	3.81424e+08
Capric acid	3.97	171.139	474.9	C10H20O2	NEG	1.68401e+08
Hexadecanedioic acid	3.97	285.207	473.1	C16H30O4	NEG	2.91558e+08
4-Ethyloctanoic acid	3.97	171.139	463.6	C10H20O2	NEG	1.15809e+07
Pelargonic acid	3.97	157.124	453.4	C9H18O2	NEG	2.45544e+08
Caprylic acid	3.97	143.108	425.1	C8H16O2	NEG	3.24799e+07
Valproic acid	3.97	143.108	425.1	C8H16O2	NEG	3.24799e+07
(Z)-6-methyl-2-(4-methylpent-3-enyl)hept-2-enedioic acid	3.97	253.145	419.9	C14H22O4	NEG	2.72627e+07
3-Hydroxydecanoic acid	3.97	187.134	414.7	C10H20O3	NEG	6.10225e+09
Hesperetin	3.97	301.072	355.5	C16H14O6	NEG	2.9773e+08
3-Hydroxyoctanoic acid	3.97	159.103	351.8	C8H16O3	NEG	1.14852e+09
13,14-Dihydro-15-ketotetranorprostaglandin F1.beta.	3.97	299.186	341.1	C16H28O5	NEG	1.09948e+08
(S)-Abscisic acid	3.97	263.129	324	C15H20O4	NEG	6.07015e+08
Propylgallate	3.97	211.061	305.5	C10H12O5	NEG	1.3399e+09
Valeric acid	3.97	101.061	304.1	C5H10O2	NEG	4.77892e+07
Rosmarinic acid	3.97	359.077	296.1	C18H16O8	NEG	1.40038e+08
Hydroxytyrosol acetate	3.97	195.066	294.3	C10H12O4	NEG	1.12061e+08
Indolelactic acid	3.97	204.067	293.4	C11H11NO3	NEG	2.87985e+08
Homoveratric acid	3.97	195.066	273.3	C10H12O4	NEG	3.68792e+07
(4E)-8-hydroxy-4-(2-hydroxy-1-methyl-ethylidene)-10-oxatricyclo[7.2.1.01,5]dodecane-8-carboxylic acid	3.97	281.14	264.4	C15H22O5	NEG	1.89079e+08
4-Hydroxyphenethylalcohol	3.97	137.061	237.7	C8H10O2	NEG	4.40578e+08
Glyceric acid	3.97	105.019	44.3	C3H6O4	NEG	8.20965e+07
Threonic acid	3.97	135.03	43.9	C4H8O5	NEG	2.87685e+07
3-hydroxybenzaldehyde	3.97	121.029	33.6	C7H6O2	NEG	5.6283e+07
Traumatic acid	3.97	227.129	305.8	C12H20O4	NEG	6.47155e+08
3-Pyridol	3.97	94.0297	47.3	C5H5NO	NEG	5.14383e+07
4-hydroxy-3',6-dimethoxy-5'-methyl-spiro[benzofuran-2,4'-cyclohex-2-ene]-1',3-dione	3.97	303.087	37.5	C16H16O6	NEG	2.69163e+07
Indole-3-carboxaldehyde	3.97	144.045	33.8	C9H7NO	NEG	3.14296e+07
Ethyl Vanillate	3.97	195.066	32.7	C10H12O4	NEG	9.81528e+07
Ethyl 3-hydroxybenzoate	3.97	165.055	32.4	C9H10O3	NEG	7.91846e+07
Ethyl 4-hydroxybenzoate	3.97	165.055	32.4	C9H10O3	NEG	7.91846e+07
5-acetyl-2-hydroxy-benzoic acid	3.97	179.035	30.9	C9H8O4	NEG	5.01985e+07
Kaurenoic acid	3.96	301.217	542.2	C20H30O2	NEG	1.80334e+08
1,4a,7-trimethyl-7-vinyl-3,4,6,8,8a,9,10,10a-octahydro-2H-phenanthrene-1-carboxylic acid	3.96	301.217	542.2	C20H30O2	NEG	1.80334e+08
(5R,9S)-5,9-dimethyl-14-methylene-tetracyclo[11.2.1.01,10.04,9]hexadecane-5-carboxylic acid	3.96	301.217	542.2	C20H30O2	NEG	1.80334e+08
12-Methyltridecanoic acid	3.96	227.202	541.8	C14H28O2	NEG	2.0584e+09
Arachidonic acid (AA)	3.96	303.233	540.8	C20H32O2	NEG	3.73007e+06
3-Epioleanolic acid	3.96	455.354	528.4	C30H48O3	NEG	1.25082e+06
hexyl hexanoate	3.96	199.17	511.6	C12H24O2	NEG	9.33459e+08
ethyl octanoate	3.96	171.139	474.9	C10H20O2	NEG	1.68401e+08
5-butyl-4-methoxy-6-methyl-pyran-2-one	3.96	197.117	394.1	C11H16O3	POS	3.37556e+06
Isoformononetin	3.96	269.08	371	C16H12O4	POS	4.98849e+07
1-hydroxy-3-oxo-tetradecane-1-sulfonic acid	3.96	307.159	533.7	C14H28O5S	NEG	1.10179e+07
(1R,2R,5S,8R,14R,15R,16S)-16-hydroxy-8-isopropenyl-1,2,14,17,17-pentamethyl-pentacyclo[11.7.0.02,10.05,9.014,18]icosane-5,15-dicarboxylic acid	3.96	485.328	482.7	C30H46O5	NEG	2.55889e+07
9-hydroxy-7-isopropyl-1,4a-dimethyl-2,3,4,9,10,10a-hexahydrophenanthrene-1-carboxylic acid	3.96	315.197	467	C20H28O3	NEG	6.65002e+07
5-[(E)-4-carboxy-3-methyl-but-3-enyl]-1,4a-dimethyl-6-methylene-decalin-1-carboxylic acid	3.96	333.207	455.4	C20H30O4	NEG	4.32222e+07
5,9-dimethyltetracyclo[11.2.1.01,10.04,9]hexadecane-5,14-dicarboxylic acid	3.96	333.207	455.4	C20H30O4	NEG	4.32222e+07
3,12-dihydroxy-4,6a,6b,11,12,14b-hexamethyl-1,2,3,4a,5,6,7,8,9,10,11,12a,14,14a-tetradecahydropicene-4,8a-dicarboxylic acid	3.96	501.323	433	C30H46O6	NEG	429106
(4aS,6aS,6bR,8R,9R,10R,11R,12aR,14bS)-8,10,11-trihydroxy-9-(hydroxymethyl)-2,2,6a,6b,9,12a-hexamethyl-1,3,4,5,6,6a,7,8,8a,10,11,12,13,14b-tetradecahydropicene-4a-carboxylic acid	3.96	503.339	422.2	C30H48O6	NEG	1.39628e+06
(4aR,6aS,9aR)-1,8,8-trimethyl-2-oxo-1,4,4a,6a,7,9-hexahydropentaleno[1,6a-c]pyran-5-carboxylic acid	3.96	263.129	374.2	C15H20O4	NEG	1.48326e+07
4-Allylcatechol	3.96	149.061	352.8	C9H10O2	NEG	2.71392e+07
(E)-8-hydroxy-2,6-dimethyl-oct-2-enoic acid	3.96	185.118	341.3	C10H18O3	NEG	5.4002e+09
3,5-Dimethoxybenzoic acid	3.96	181.051	340.3	C9H10O4	NEG	3.70905e+07
4-Chromanone	3.96	147.045	332.6	C9H8O2	NEG	1.31969e+08
p-Toluquinone	3.96	121.03	321.7	C7H6O2	NEG	2.71096e+09
Indole-3-carboxylic acid	3.96	160.04	317.1	C9H7NO2	NEG	8.21137e+07
3,5,7-trihydroxy-2-[4-hydroxy-3-[(2S,3R,4S,5S,6R)-3,4,5-trihydroxy-6-(hydroxymethyl)tetrahydropyran-2-yl]oxy-phenyl]chromen-4-one	3.96	463.089	314.3	C21H20O12	NEG	3.82264e+07
2-Hydroxy-3-methylquinoxaline	3.96	159.056	286.8	C9H8N2O	NEG	1.62251e+09
3-Hydroxybenzoic acid	3.96	137.024	249.6	C7H6O3	NEG	4.68866e+09
Methylgallate	3.96	183.03	244.8	C8H8O5	NEG	5.81046e+07
Cichoriin	3.96	339.072	242.2	C15H16O9	NEG	4.04689e+07
Chlorogenic acid	3.96	353.088	237.4	C16H18O9	NEG	3.68984e+08
Hippuric acid	3.96	178.051	235.5	C9H9NO3	NEG	5.52702e+07
5-ketocaproate	3.96	129.056	166.9	C6H10O3	NEG	4.20903e+07
Lactate	3.96	89.0245	48.4	C3H6O3	NEG	6.82029e+07
Uracil	3.96	111.02	47.1	C4H4N2O2	NEG	3.38874e+06
Tartaric acid	3.96	149.009	60.1	C4H6O6	NEG	1.43477e+07
3-phenyl-1-(2,4,6-trihydroxyphenyl)prop-2-en-1-one	3.96	255.066	32.9	C15H12O4	NEG	1.97636e+09
Maltose	3.96	365.105	402.8	C12H22O11	POS	2.52946e+06
Nicotiflorin	3.96	595.165	255.4	C27H30O15	POS	2.33049e+08
Adenosine	3.96	268.103	172.7	C10H13N5O4	POS	3.07016e+08
Tyrphostin AG1296	3.96	267.113	34.7	C16H14N2O2	POS	2.47101e+07
Stearamide	3.96	284.294	29.7	C18H37NO	POS	4.63361e+07
Fumaric acid	3.96	115.004	388.5	C4H4O4	NEG	1.07875e+06
Sarcosine	3.96	88.0403	338.9	C3H7NO2	NEG	1.88416e+06
Pantothenic acid	3.96	218.103	283.2	C9H17NO5	NEG	1.78493e+08
(2R,3R,4S,5S,6R)-2-[(E)-4,7-dihydroxy-3,7-dimethyl-oct-2-enoxy]-6-(hydroxymethyl)tetrahydropyran-3,4,5-triol	3.96	349.187	251	C16H30O8	NEG	1.57949e+08
2-Ethyl-2-hydroxybutyric acid	3.96	131.071	108.5	C6H12O3	NEG	2.08676e+07
Caproic acid	3.96	115.076	62	C6H12O2	NEG	7.77543e+07
Paullinic acid	3.96	309.279	38.3	C20H38O2	NEG	6.24634e+08
Salicylic acid	3.96	137.024	33.9	C7H6O3	NEG	2.76084e+09
Isopimaric acid	3.95	301.217	542.2	C20H30O2	NEG	1.80334e+08
(1S,5S,8S,9R)-2,5,9-trimethyltricyclo[6.3.0.01,5]undec-2-ene-3-carboxylic acid	3.95	233.155	495.2	C15H22O2	NEG	1.78966e+07
Demethoxycapillarisin	3.95	287.055	370.4	C15H10O6	POS	5.31092e+08
2-Methylheptanoic acid	3.95	143.108	425.1	C8H16O2	NEG	3.24799e+07
Royal jelly acid	3.95	185.118	341.3	C10H18O3	NEG	5.4002e+09
Daphnin	3.95	339.072	242.2	C15H16O9	NEG	4.04689e+07
(2S)-5-hydroxy-2-(3-hydroxy-4-methoxy-phenyl)-7-methoxy-chroman-4-one	3.95	317.101	391.8	C17H16O6	POS	3.19494e+07
Bauhiniaside B	3.95	435.166	354.2	C22H26O9	POS	1.11406e+08
(E)-3-(4-hydroxyphenyl)-N-[3-[[(E)-3-(4-hydroxyphenyl)prop-2-enoyl]-[4-[[(E)-3-(4-hydroxyphenyl)prop-2-enoyl]-[3-[[(E)-3-(4-hydroxyphenyl)prop-2-enoyl]amino]propyl]amino]butyl]amino]propyl]prop-2-enamide	3.95	787.369	350.8	C46H50N4O8	POS	9.69392e+07
8-Hydroxycarbostyril	3.95	162.055	261.8	C9H7NO2	POS	8.55934e+07
2-Phenylacetamide	3.95	136.075	248.9	C8H9NO	POS	3.37126e+08
N-acetyldopamine	3.95	196.096	213.8	C10H13NO3	POS	4.58308e+07
1,7-Dimethylxanthine	3.95	181.072	206.7	C7H8N4O2	POS	3.14806e+06
Myristoleic acid	3.95	225.186	519.5	C14H26O2	NEG	2.93995e+08
(2E,4Z)-9-oxooctadeca-2,4-dienoic acid	3.95	293.212	481.9	C18H30O3	NEG	4.74652e+08
ethyl 2,2-dimethyl-3-(2-methylprop-1-enyl)cyclopropanecarboxylate	3.95	195.139	425.7	C12H20O2	NEG	1.25741e+08
Dodecanedioic acid	3.95	211.134	400.5	C12H22O4	NEG	1.14926e+08
Britanin	3.95	365.161	358.6	C19H26O7	NEG	1.56356e+07
10-Hydroxydecanoic acid	3.95	187.134	355.9	C10H20O3	NEG	2.11767e+09
Isocaproic acid	3.95	115.076	349	C6H12O2	NEG	3.11511e+07
2,6-dihydroxy-7-methoxy-1,1,4a-trimethyl-3,4,10,10a-tetrahydro-2H-phenanthren-9-one	3.95	303.16	327.7	C18H24O4	NEG	3.89219e+07
Methyl Paraben	3.95	151.04	324.6	C8H8O3	NEG	9.87491e+08
Phenylalanine	3.95	164.072	93.7	C9H11NO2	NEG	9.28849e+06
Pyruvaldehyde	3.95	71.0139	90.6	C3H4O2	NEG	9.73105e+06
Acetylproline	3.95	156.067	87.6	C7H11NO3	NEG	8.39334e+06
Pyruvate	3.95	87.0088	58.2	C3H4O3	NEG	2.01795e+07
Stearic acid	3.95	283.264	590.4	C18H36O2	NEG	1.36089e+07
Fructose	3.95	179.056	40.9	C6H12O6	NEG	5.0044e+07
2-[(2S,4aR,8aS)-2-hydroxy-4a-methyl-8-methylene-decalin-2-yl]prop-2-enoic acid	3.95	249.15	47.1	C15H22O3	NEG	6.09986e+06
2,4-dihydroxy-3,5,6-trimethyl-benzoic acid	3.95	195.066	32.7	C10H12O4	NEG	9.81528e+07
Xanthoxylin	3.95	195.066	32.7	C10H12O4	NEG	9.81528e+07
cis-11-Eicosenoic acid	3.95	309.279	38.3	C20H38O2	NEG	6.24634e+08
4-Hydroxyphenylacetaldehyde	3.95	135.045	33.6	C8H8O2	NEG	1.13933e+08
Glycerophosphocholine	3.95	258.11	397.9	C8H20NO6P	POS	1.97466e+06
2-(1-hydroxyethyl)-3H-quinazolin-4-one	3.95	173.071	38.2	C10H10N2O2	POS	1.09667e+08
2,2-dimethyl-6H-pyrano[3,2-c]quinolin-5-one	3.95	228.101	37.5	C14H13NO2	POS	3.94897e+07
Vincamine	3.95	337.19	34.7	C21H26N2O3	POS	1.6963e+07
(+)-Usnic acid	3.95	345.096	23.2	C18H16O7	POS	203791
Oxalic acid	3.95	88.9879	424.4	C2H2O4	NEG	8.6638e+06
Levulinic acid	3.95	115.04	209.3	C5H8O3	NEG	4.09355e+07
2-Hydroxycinnamic acid	3.95	163.04	161	C9H8O3	NEG	1.15563e+07
2-Hydroxy-6-methoxybenzoic acid	3.95	167.035	57.7	C8H8O4	NEG	1.36391e+08
2-Methylcaproic acid	3.95	129.092	54.9	C7H14O2	NEG	1.28433e+07
7-hydroxy-4-(hydroxymethyl)-3,4a,8,8-tetramethyl-5,6,7,8a-tetrahydro-4H-naphthalen-1-one	3.95	233.155	29.7	C15H24O3	NEG	9.78222e+07
(1S,2R,9R,11R,12R,15R)-11-hydroxy-2,6,9,15-tetramethyl-13-oxatetracyclo[10.2.1.02,10.05,9]pentadeca-4,6-diene-3,8,14-trione	3.95	315.124	28.8	C18H20O5	NEG	3.71885e+06
2,6-Dihydroxybenzoic acid	3.95	153.019	23.6	C7H6O4	NEG	3.12934e+09
1,4-Dicaffeoylquinic acid	3.94	499.123	296.4	C25H24O12	POS	2.45645e+06
4,5-Dicaffeoylquinic acid	3.94	499.123	296.4	C25H24O12	POS	2.45645e+06
2,10,10-trimethyltricyclo[6.3.0.01,5]undec-6-ene-6-carboxylic acid	3.94	233.155	495.2	C15H22O2	NEG	1.78966e+07
5,7-Dihydroxycoumarin	3.94	177.019	272.9	C9H6O4	NEG	2.05951e+08
Sorbose	3.94	179.056	40.9	C6H12O6	NEG	5.0044e+07
Tris(2,4-di-tert-butylphenyl)phosphate	3.94	663.452	567.3	C42H63O4P	POS	992554
trans-Chalcone	3.94	209.096	439.5	C15H12O	POS	1.86432e+07
6-methoxy-4-methyl-chromen-2-one	3.94	191.07	334.9	C11H10O3	POS	6.74747e+07
Isopentenyladenosine	3.94	336.166	323.7	C15H21N5O4	POS	2.47533e+09
3,5-dihydroxy-2-(4-hydroxyphenyl)-7-[(2S,3R,4S,5S,6R)-3,4,5-trihydroxy-6-(hydroxymethyl)tetrahydropyran-2-yl]oxy-chromen-4-one	3.94	449.107	310.2	C21H20O11	POS	2.21835e+08
1-methyl-2-propyl-quinolin-4-one	3.94	202.122	308	C13H15NO	POS	1.07402e+08
Narcissin	3.94	625.175	304.3	C28H32O16	POS	1.20965e+08
Caprolactam	3.94	114.091	212.7	C6H11NO	POS	1.22015e+08
Nicotinamide N-oxide	3.94	139.05	44	C6H6N2O2	POS	1.26625e+07
(E)-11-hydroxyoctadec-9-enoic acid	3.94	297.244	493.5	C18H34O3	NEG	1.51355e+09
5-[(Z)-5-hydroxy-3-methyl-pent-3-enyl]-1,4a-dimethyl-6-methylene-decalin-1-carboxylic acid	3.94	319.228	458.8	C20H32O3	NEG	1.46215e+07
(2Z,6E,10E)-12-hydroxy-6,10-dimethyl-2-(4-methylpent-3-enyl)dodeca-2,6,10-trienoic acid	3.94	319.228	458.8	C20H32O3	NEG	1.46215e+07
(2E,6E,10E)-12-hydroxy-6,10-dimethyl-2-(4-methylpent-3-enyl)dodeca-2,6,10-trienoic acid	3.94	319.228	458.8	C20H32O3	NEG	1.46215e+07
Pseudolaric Acid A	3.94	387.182	443.2	C22H28O6	NEG	3.03353e+06
2-hexyl-3-methylene-butanedioic acid	3.94	213.113	412	C11H18O4	NEG	2.73108e+07
Demethylnobiletin	3.94	387.109	375.8	C20H20O8	NEG	2.34044e+07
Sebacic acid	3.94	201.113	354.4	C10H18O4	NEG	4.34797e+10
Liquiritigenin	3.94	255.066	337.9	C15H12O4	NEG	3.10667e+07
2-Benzylsuccinic acid	3.94	207.066	332.2	C11H12O4	NEG	5.02836e+07
Indoleacetic acid	3.94	174.056	319.1	C10H9NO2	NEG	1.1726e+08
(E)-4-hydroxydodec-2-enedioic acid	3.94	243.124	316.3	C12H20O5	NEG	4.89326e+07
Lumichrome	3.94	241.073	309	C12H10N4O2	NEG	2.67031e+08
Phloroglucinaldehyde	3.94	153.019	294.5	C7H6O4	NEG	3.95081e+08
Salicylamide	3.94	136.04	279.5	C7H7NO2	NEG	8.93947e+07
Hydroxyisocaproic acid	3.94	131.071	263.5	C6H12O3	NEG	2.63979e+08
2-Hydroxyhexanoic acid	3.94	131.071	263.5	C6H12O3	NEG	2.63979e+08
Phenylacetylglycine	3.94	192.067	253.4	C10H11NO3	NEG	7.05108e+07
2-Isopropylmalic acid	3.94	175.061	216.4	C7H12O5	NEG	5.09958e+08
Tryptophan	3.94	203.083	197.3	C11H12N2O2	NEG	1.77622e+07
2-Hydroxy-3-methylbutyric acid	3.94	99.0452	164.5	C5H10O3	NEG	1.11723e+07
2-Hydroxystearic acid	3.94	299.259	49.4	C18H36O3	NEG	1.29073e+08
5-Hydroxytryptophol (5HTOL)	3.94	176.072	32.6	C10H11NO2	NEG	3.96124e+07
Isovaleric acid	3.94	101.061	83.6	C5H10O2	NEG	9.83951e+07
EDTA	3.94	293.097	458.4	C10H16N2O8	POS	994607
5,6-dihydroxy-4,5,6-trimethyl-13-oxido-2,8-dioxa-13-azoniatricyclo[8.5.1.013,16]hexadec-10-ene-3,7-dione	3.94	342.154	291.4	C16H23NO7	POS	6.74584e+07
Riboflavin	3.94	377.145	227.9	C17H20N4O6	POS	2.49084e+07
2,6-Dimethoxybenzoic acid	3.94	165.054	173.2	C9H10O4	POS	1.32891e+08
4-Methylquinolin-2-ol	3.94	160.075	40.3	C10H9NO	POS	1.64275e+07
DEHP	3.94	391.283	29	C24H38O4	POS	3.68194e+07
Proline	3.94	116.07	321.8	C5H9NO2	POS	6.63679e+06
Sucrose	3.94	341.108	374.3	C12H22O11	NEG	3.35145e+06
Azelaic acid	3.94	169.087	348.6	C9H16O4	NEG	1.07032e+07
4-Hydroxybenzoic acid	3.94	137.024	184.3	C7H6O3	NEG	3.53406e+09
Xylulose	3.94	149.045	144.7	C5H10O5	NEG	1.59324e+06
all-trans-5,6-Epoxyretinoic acid	3.94	315.196	53.9	C20H28O3	NEG	2.91612e+07
3-Methylbut-2-enoic acid	3.94	99.045	50	C5H8O2	NEG	9.0381e+07
3,4,5-trihydroxybenzaldehyde	3.94	153.019	49.3	C7H6O4	NEG	2.16322e+08
Sulfuretin	3.94	269.045	45.7	C15H10O5	NEG	1.0078e+08
1,3,5,8-tetrahydroxyxanthen-9-one	3.94	259.024	44.7	C13H8O6	NEG	3.09906e+08
Wedelolactone	3.94	313.035	37.4	C16H10O7	NEG	5.39786e+08
1,3,8-trihydroxy-6-(2-hydroxypropyl)anthracene-9,10-dione	3.94	313.071	32.4	C17H14O6	NEG	6.76277e+08
Tetradecyl sulfate (sodium)	3.94	293.179	22.9	C14H30O4S	NEG	3.33315e+09
3,4-Dicaffeoylquinic acid	3.93	499.123	296.4	C25H24O12	POS	2.45645e+06
(10Z)-3a,10-dimethyl-1-prop-1-en-2-yl-2,3,4,5,6,7,8,9,12,12a-decahydro-1H-cyclopenta[11]annulene-6-carboxylic acid	3.93	303.233	540.8	C20H32O2	NEG	3.73007e+06
7-hydroxy-2-(4-methoxyphenyl)chromen-4-one	3.93	269.08	371	C16H12O4	POS	4.98849e+07
Benzoic acid	3.93	121.03	321.7	C7H6O2	NEG	2.71096e+09
Allose	3.93	179.056	40.9	C6H12O6	NEG	5.0044e+07
14-(hydroxymethyl)-5,9-dimethyl-tetracyclo[11.2.1.01,10.04,9]hexadecane-5-carboxylic acid	3.93	319.228	458.8	C20H32O3	NEG	1.46215e+07
(5S,9R)-14-(hydroxymethyl)-5,9-dimethyl-tetracyclo[11.2.1.01,10.04,9]hexadecane-5-carboxylic acid	3.93	319.228	458.8	C20H32O3	NEG	1.46215e+07
Lauric diethanolamide	3.93	288.253	464.3	C16H33NO3	POS	1.90571e+07
5-hydroxy-3,7-dimethoxy-2-phenyl-chromen-4-one	3.93	299.091	448.4	C17H14O5	POS	2.88466e+07
Gnaphaliin	3.93	315.086	401.9	C17H14O6	POS	4.20748e+07
5-hydroxy-2-(4-hydroxyphenyl)-7-methoxy-chroman-4-one	3.93	287.091	394.9	C16H14O5	POS	1.29985e+08
Kaempferol 3-methyl ether	3.93	301.07	375.3	C16H12O6	POS	1.43679e+08
3-hydroxy-N-(2-methylpropyl)-3-phenylpropanamide	3.93	204.138	327.4	C13H19NO2	POS	3.16057e+07
Mauritianin	3.93	741.223	284.7	C33H40O19	POS	1.10455e+08
indolin-2-one	3.93	134.06	275.9	C8H7NO	POS	1.68308e+07
4-hydroxy-3,5,6-trimethyl-pyran-2-one	3.93	137.06	270.8	C8H10O3	POS	7.57264e+07
Benzamide	3.93	122.06	236.6	C7H7NO	POS	3.80774e+07
N6-Methyladenosine	3.93	282.119	213.8	C11H15N5O4	POS	1.10197e+08
2-Piperidone	3.93	100.076	108.5	C5H9NO	POS	3.87905e+08
Nicotinate	3.93	124.039	60.9	C6H5NO2	POS	3.9347e+06
Met-Gly	3.93	189.069	49.7	C7H14N2O3S	POS	9.22746e+06
Nervonic acid	3.93	365.343	634.4	C24H46O2	NEG	1.16563e+06
Octadecanedioic acid	3.93	313.239	503.1	C18H34O4	NEG	5.87097e+07
14,16-dihydroxy-4-methyl-3-oxabicyclo[10.4.0]hexadeca-1(12),13,15-trien-2-one	3.93	277.145	469.4	C16H22O4	NEG	6.31471e+07
13(S)-HpOTrE	3.93	291.197	465.4	C18H30O4	NEG	7.86542e+07
(Z)-9,10,11-trihydroxyoctadec-12-enoic acid	3.93	329.234	406.8	C18H34O5	NEG	4.77704e+08
Azaleatin	3.93	315.051	320.2	C16H12O7	NEG	3.37428e+07
Miquelianin	3.93	477.068	306.2	C21H18O13	NEG	2.33806e+06
8-hydroxy-4-(1-hydroxy-1-methyl-ethyl)-10-oxatricyclo[7.2.1.01,5]dodec-3-ene-8-carboxylic acid	3.93	281.14	287.4	C15H22O5	NEG	2.36334e+08
Vanillin	3.93	151.04	276	C8H8O3	NEG	4.59353e+08
2-(2-Butoxyethoxy)acetic acid	3.93	175.098	273.6	C8H16O4	NEG	5.31524e+08
methyl 5-hydroxy-1H-indole-3-carboxylate	3.93	190.051	268.8	C10H9NO3	NEG	1.41656e+09
3-Hydroxyphenylacetic acid	3.93	151.04	250.2	C8H8O3	NEG	9.29492e+07
4,7,7-trimethyl-3-oxo-2-oxabicyclo[2.2.1]heptane-1-carboxylic acid	3.93	197.082	245.6	C10H14O4	NEG	3.05819e+07
3-Methyl-2-oxovaleric acid	3.93	129.056	233.1	C6H10O3	NEG	2.05747e+07
Adipic acid	3.93	145.051	209.9	C6H10O4	NEG	4.3458e+08
2-Methylglutaric acid	3.93	145.051	209.9	C6H10O4	NEG	4.3458e+08
Succinate	3.93	117.019	59.7	C4H6O4	NEG	3.54591e+07
Valine	3.93	116.072	44.3	C5H11NO2	NEG	6.47453e+06
Gluconic acid	3.93	195.051	43.9	C6H12O7	NEG	1.9564e+07
Trehalose	3.93	365.105	402.8	C12H22O11	POS	2.52946e+06
LPC(16:0)	3.93	496.34	216.5	C24H50NO7P	POS	8.7256e+06
Adenine	3.93	136.061	162.5	C5H5N5	POS	1.39888e+08
Hexaethylene glycol	3.93	283.174	61.7	C12H26O7	POS	3.53871e+07
AG 1295	3.93	235.123	33.3	C16H14N2	POS	1.41851e+07
Corynoxine	3.93	385.211	33	C22H28N2O4	POS	3.94886e+07
Corynoxine B	3.93	385.211	33	C22H28N2O4	POS	3.94886e+07
2-oxindole-3-acetate	3.93	190.051	230.8	C10H9NO3	NEG	1.77607e+07
(1R,8S,9S)-3,4,8-trihydroxy-5-isopropyl-11,11-dimethyl-16-oxatetracyclo[7.5.2.01,10.02,7]hexadeca-2,4,6-trien-15-one	3.93	345.17	198	C20H26O5	NEG	3.55069e+07
Kaempferol-3-O-galactoside	3.93	447.093	180.3	C21H20O11	NEG	3.27501e+08
3-Hydroxycinnamic acid	3.93	163.04	177.1	C9H8O3	NEG	9.32434e+08
Isovanillin	3.93	151.04	42	C8H8O3	NEG	2.88961e+08
methyl 3-(2,5-dihydroxyphenyl)prop-2-enoate	3.93	175.04	34	C10H10O4	NEG	6.71649e+06
methyl 2-hydroxy-6-(4-hydroxy-2-methoxy-6-methoxycarbonyl-phenoxy)-4-methyl-benzoate	3.93	361.093	33.6	C18H18O8	NEG	2.90932e+07
ethyl 3,5-dihydroxybenzoate	3.93	181.05	32.8	C9H10O4	NEG	2.36709e+08
Phloroglucinol	3.92	125.025	95.5	C6H6O3	NEG	3.46238e+07
1,1,9a-trimethyl-3,4,8,9-tetrahydro-2H-benzo[7]annulene-7-carboxylic acid	3.92	233.155	495.2	C15H22O2	NEG	1.78966e+07
Brevicuspisaponin 2	3.92	503.339	422.2	C30H48O6	NEG	1.39628e+06
Galactose	3.92	179.056	40.9	C6H12O6	NEG	5.0044e+07
2-Aminonicotinic acid	3.92	139.05	44	C6H6N2O2	POS	1.26625e+07
6-aminopyridine-3-carboxylic acid	3.92	139.05	44	C6H6N2O2	POS	1.26625e+07
Anthranilic acid (Vitamin L1)	3.92	136.04	279.5	C7H7NO2	NEG	8.93947e+07
1-Methyladenosine	3.92	282.119	213.8	C11H15N5O4	POS	1.10197e+08
Cholest-4-en-3-one	3.92	385.346	623.4	C27H44O	POS	3.74979e+06
PC(36:5)	3.92	780.552	605.7	C44H78NO8P	POS	2.77741e+07
Palmitamide	3.92	256.263	526.5	C16H33NO	POS	8.90737e+06
5,6,7-trihydroxy-2-(4-methoxyphenyl)chromen-4-one	3.92	301.07	363.7	C16H12O6	POS	8.55348e+07
(E)-3-(4-hydroxyphenyl)-N-[4-[[(E)-3-(4-hydroxyphenyl)prop-2-enoyl]amino]butyl]prop-2-enamide	3.92	381.18	323.2	C22H24N2O4	POS	9.49246e+07
2-methyl-3-[(2S,3R,4S,5S,6R)-3,4,5-trihydroxy-6-(hydroxymethyl)tetrahydropyran-2-yl]oxy-pyran-4-one	3.92	289.091	123.3	C12H16O8	POS	2.96179e+06
PC(34:3)	3.92	756.552	629.9	C42H78NO8P	POS	1.68626e+07
methyl (2S)-5-oxopyrrolidine-2-carboxylate	3.92	144.065	101.2	C6H9NO3	POS	5.77173e+06
2-hydroxydodecanoic acid	3.92	215.165	477.2	C12H24O3	NEG	4.70527e+07
Emodin	3.92	269.046	455.4	C15H10O5	NEG	3.84983e+08
(Z)-2-oct-7-enylpent-2-enedioic acid	3.92	239.129	425.7	C13H20O4	NEG	9.82263e+07
(4E,7E)-dodeca-4,7-dienedioic acid	3.92	225.113	369	C12H18O4	NEG	1.74008e+08
3,5-dihydroxydecanoic acid	3.92	203.129	344.1	C10H20O4	NEG	5.038e+07
Butyllactate	3.92	145.087	321.9	C7H14O3	NEG	1.73904e+09
Umbelliferone	3.92	161.024	295.9	C9H6O3	NEG	1.13271e+07
Suberic acid	3.92	173.082	294.2	C8H14O4	NEG	8.75715e+09
3-Methyladipic acid	3.92	159.066	242.2	C7H12O4	NEG	1.97636e+07
Caffeic acid	3.92	179.035	241.8	C9H8O4	NEG	8.15823e+07
N-[2-(4-hydroxyphenyl)ethyl]acetamide	3.92	178.087	236	C10H13NO2	NEG	9.70952e+07
Pyrrole-2-carboxylic acid	3.92	110.025	217.5	C5H5NO2	NEG	5.5569e+08
Arabinono-1,4-lactone	3.92	147.03	43.9	C5H8O5	NEG	3.04622e+07
(1S,5S,8R,9S)-9-hydroxy-2,5,9-trimethyltricyclo[6.3.0.01,5]undec-2-ene-3-carboxylic acid	3.92	249.15	47.1	C15H22O3	NEG	6.09986e+06
2,3-Dihydroxybenzoic acid (Pyrocatechuic acid)	3.92	153.019	49.3	C7H6O4	NEG	2.16322e+08
2-Hydroxyphenylacetic acid	3.92	151.04	42	C8H8O3	NEG	2.88961e+08
5,7-dihydroxy-2-(2-hydroxyphenyl)-6,8-dimethoxy-chromen-4-one	3.92	329.067	33.4	C17H14O7	NEG	7.38321e+07
Betaine	3.92	118.086	283.9	C5H11NO2	POS	3.50521e+06
4-methyl-3-sec-butyl-2,3-dihydropyrrolo[3,4-b]quinoline-1,9-dione	3.92	271.144	36.5	C16H18N2O2	POS	8.46563e+07
Rhodomyrtosone D	3.92	429.227	25.7	C25H32O6	POS	433041
Asperulosidic Acid	3.92	431.119	338.4	C18H24O12	NEG	7.21738e+06
3a-[(2S,3R,4S,5R,6R)-3,5-dihydroxy-6-[[(2R,3R,4S,5S,6R)-3,4,5-trihydroxy-6-(hydroxymethyl)tetrahydropyran-2-yl]oxymethyl]-4-[(2S,3R,4R,5R,6S)-3,4,5-trihydroxy-6-methyl-tetrahydropyran-2-yl]oxy-tetrahydropyran-2-yl]oxycarbonyl-9-hydroxy-1-isopropenyl-5b,8,8,11a-tetramethyl-1,2,3,4,5,6,7,7a,9,10,11,11b,12,13,13a,13b-hexadecahydrocyclopenta[a]chrysene-5a-carboxylic acid	3.92	955.489	308.2	C48H76O19	NEG	2.22738e+06
Soyasaponin I	3.92	941.511	306.7	C48H78O18	NEG	2.93981e+06
5-Hydroxyhexanoic acid	3.92	131.071	237.3	C6H12O3	NEG	2.81064e+07
4-Hydroxyphenylacetic acid	3.92	151.04	209.3	C8H8O3	NEG	9.72094e+07
Cacticin	3.92	477.104	162.8	C22H22O12	NEG	8.97925e+07
(Z)-9,12,13-trihydroxyoctadec-15-enoic acid	3.92	329.233	146.6	C18H34O5	NEG	2.49642e+09
Mandelic acid	3.92	151.04	88.1	C8H8O3	NEG	9.73831e+07
3-Methoxytyrosine	3.92	210.077	46.1	C10H13NO4	NEG	6.79918e+06
3-hydroxy-2-[(Z)-oct-2-enyl]pentanedioic acid	3.92	239.129	38.2	C13H22O5	NEG	2.76775e+08
methyl 8-hydroxy-9-oxo-xanthene-1-carboxylate	3.92	269.045	25.3	C15H10O5	NEG	6.55191e+06
5Z,8Z,11Z-Eicosatrienoic acid	3.91	305.249	555.7	C20H34O2	NEG	2.19287e+07
4,7-dihydroxychromen-2-one	3.91	177.019	272.9	C9H6O4	NEG	2.05951e+08
Homoeriodictyol	3.91	301.072	355.5	C16H14O6	NEG	2.9773e+08
(1R,2R,4aS,6aS,6bR,10R,11S,12R,12aR)-1,10,11,12-tetrahydroxy-1,2,6a,6b,9,9,12a-heptamethyl-2,3,4,5,6,6a,7,8,8a,10,11,12,13,14b-tetradecahydropicene-4a-carboxylic acid	3.91	503.339	422.2	C30H48O6	NEG	1.39628e+06
Polygalacic acid	3.91	503.339	422.2	C30H48O6	NEG	1.39628e+06
gamma-CEHC (gamma-Carboxyethyl hydrochroman)	3.91	263.129	374.2	C15H20O4	NEG	1.48326e+07
Theophylline	3.91	181.072	206.7	C7H8N4O2	POS	3.14806e+06
(4E,8E)-10-(4-hydroxy-6-methoxy-7-methyl-3-oxo-1H-isobenzofuran-5-yl)-4,8-dimethyl-deca-4,8-dienoic acid	3.91	387.182	443.2	C22H28O6	NEG	3.03353e+06
3-Isopropylmalic acid	3.91	175.061	216.4	C7H12O5	NEG	5.09958e+08
5,7-dihydroxy-2-(4-hydroxyphenyl)-3,6-dimethoxy-chromen-4-one	3.91	331.081	369.3	C17H14O7	POS	3.31586e+07
(E)-3-(4-hydroxyphenyl)-N-[4-[[(E)-3-(4-hydroxyphenyl)prop-2-enoyl]-[3-[[(E)-3-(4-hydroxyphenyl)prop-2-enoyl]amino]propyl]amino]butyl]prop-2-enamide	3.91	584.275	346.5	C34H37N3O6	POS	5.66505e+08
phenethanolamine	3.91	120.081	72.7	C8H11NO	POS	8.24237e+06
Ursolic acid	3.91	455.354	541.8	C30H48O3	NEG	3.1071e+06
3-(2,5-dihydroxy-3-isopropyl-6-methyl-phenyl)-5-isopropyl-2-methyl-benzene-1,4-diol	3.91	329.176	426.6	C20H26O4	NEG	5.3684e+07
8-hydroxy-6-methyl-2-(4-methylpent-3-enyl)octa-2,6-dienoic acid	3.91	251.166	419.1	C15H24O3	NEG	1.50065e+08
methyl 3,8-dihydroxy-9-oxo-xanthene-1-carboxylate	3.91	285.041	389.4	C15H10O6	NEG	1.06487e+08
Monobutyl phthalate	3.91	221.082	384.1	C12H14O4	NEG	1.82566e+08
Nomilin	3.91	495.203	364	C28H34O9	NEG	6.66583e+06
Salidroside	3.91	299.114	227.7	C14H20O7	NEG	5.85327e+07
4-Oxohexanoic acid	3.91	129.056	206.9	C6H10O3	NEG	7.2931e+07
4-Ketopimelic acid	3.91	173.046	90	C7H10O5	NEG	1.18167e+07
Raffinose	3.91	503.162	43.5	C18H32O16	NEG	3.86474e+06
3,7-dihydroxy-9-methoxy-1-methyl-benzo[c]chromen-6-one	3.91	271.061	36.7	C15H12O5	NEG	2.40359e+09
6-hydroxy-1,5-dimethoxy-xanthen-9-one	3.91	271.061	36.7	C15H12O5	NEG	2.40359e+09
5-hydroxy-2-(4-hydroxyphenyl)-3-[(2S,3R,4S,5S,6R)-3,4,5-trihydroxy-6-(hydroxymethyl)tetrahydropyran-2-yl]oxy-7-[(2S,3R,4R,5R,6S)-3,4,5-trihydroxy-6-methyl-tetrahydropyran-2-yl]oxy-chromen-4-one	3.91	595.165	255.4	C27H30O15	POS	2.33049e+08
2-(3,4-dimethoxyphenyl)-3,5-dihydroxy-7-methoxy-chromen-4-one	3.91	345.096	23.2	C18H16O7	POS	203791
2,3-Pentanedione	3.91	99.045	50	C5H8O2	NEG	9.0381e+07
6,7,4'-Trihydroxyisoflavone	3.91	269.045	45.7	C15H10O5	NEG	1.0078e+08
3-(1,2-dihydroxypropyl)-1,6,8-trihydroxy-anthracene-9,10-dione	3.91	329.067	33.4	C17H14O7	NEG	7.38321e+07
3,5,7-trihydroxy-8-methoxy-2-(4-methoxyphenyl)chromen-4-one	3.91	329.067	33.4	C17H14O7	NEG	7.38321e+07
(2S,3S,4S,5R,6R)-6-[[(3S,4S,6aR,6bS,8aR,9R,12aS,14bR)-9-hydroxy-4-(hydroxymethyl)-4,6a,6b,8a,11,11,14b-heptamethyl-1,2,3,4a,5,6,7,8,9,10,12,12a,14,14a-tetradecahydropicen-3-yl]oxy]-5-[(2S,3R,4S,5R,6R)-4,5-dihydroxy-6-(hydroxymethyl)-3-[(2S,3R,4R,5R,6S)-3,4,5-trihydroxy-6-methyl-tetrahydropyran-2-yl]oxy-tetrahydropyran-2-yl]oxy-3,4-dihydroxy-tetrahydropyran-2-carboxylic acid	3.91	941.511	306.7	C48H78O18	NEG	2.93981e+06
(E,9S,12S,13S)-9,12,13-trihydroxyoctadec-10-enoic acid	3.91	329.233	146.6	C18H34O5	NEG	2.49642e+09
(1R,8S,16S,17S)-12-methoxy-5-oxido-15-aza-5-azoniahexacyclo[13.4.2.01,16.05,16.08,17.09,14]henicosa-2,9(14),10,12-tetraen-21-one	3.91	339.17	205.5	C20H22N2O3	POS	1.32874e+07
PC(16:0/20:4)	3.91	782.568	159.9	C44H80NO8P	POS	5.71192e+08
Tropicamide	3.91	285.159	36	C17H20N2O2	POS	3.29173e+07
Pimelic acid	3.91	159.066	381.2	C7H12O4	NEG	1.95938e+07
N-Acetyltryptophan	3.91	245.093	206.7	C13H14N2O3	NEG	1.28459e+07
Kynurenic acid	3.91	188.035	197.6	C10H7NO3	NEG	2.07513e+08
Ferulate	3.91	193.05	159.7	C10H10O4	NEG	4.15673e+08
Cyclopropylacetic acid	3.91	99.045	157.1	C5H8O2	NEG	1.11956e+08
1-[(2R,4S,5R)-4-hydroxy-5-methyl-tetrahydrofuran-2-yl]-5-methyl-pyrimidine-2,4-dione	3.91	225.088	49.1	C10H14N2O4	NEG	1.20664e+06
8-hydroxy-3-methyl-isochroman-1-one	3.91	177.055	44.4	C10H10O3	NEG	4.17876e+07
3-(2,4-Dihydroxypentyl)-6,8-dihydroxyisochromen-1-one	3.91	279.087	39	C14H16O6	NEG	5.03183e+07
(4aS,6aS,6bR,10S,12aR)-10-hydroxy-2,2,6a,6b,9,9,12a-heptamethyl-1,3,4,5,6,6a,7,8,8a,10,11,12,13,14b-tetradecahydropicene-4a-carboxylic acid	3.9	455.354	528.4	C30H48O3	NEG	1.25082e+06
(1S,4aR,6aS,6bR,9S,10R,11R,12aR,14bS)-1,10,11-trihydroxy-9-(hydroxymethyl)-2,2,6a,6b,9,12a-hexamethyl-1,3,4,5,6,6a,7,8,8a,10,11,12,13,14b-tetradecahydropicene-4a-carboxylic acid	3.9	503.339	422.2	C30H48O6	NEG	1.39628e+06
Glyceraldehyde	3.9	89.0245	48.4	C3H6O3	NEG	6.82029e+07
Dihydroxyacetone	3.9	89.0245	48.4	C3H6O3	NEG	6.82029e+07
Theobromine	3.9	181.072	206.7	C7H8N4O2	POS	3.14806e+06
Grosvenorine	3.9	741.223	284.7	C33H40O19	POS	1.10455e+08
3,3-Dimethylglutaric acid	3.9	159.066	242.2	C7H12O4	NEG	1.97636e+07
Piperine	3.9	286.143	411.9	C17H19NO3	POS	4.27303e+07
3-hydroxy-2-(4-hydroxyphenyl)chromen-4-one	3.9	255.065	409.4	C15H10O4	POS	1.18907e+09
Isophorone	3.9	139.112	356.6	C9H14O	POS	1.42782e+08
6,7-dimethoxy-8-[(2S,3R,4S,5S,6R)-3,4,5-trihydroxy-6-(hydroxymethyl)tetrahydropyran-2-yl]oxy-chromen-2-one	3.9	367.102	241.7	C17H20O10	POS	9.75537e+07
5-Hydroxyindole-3-acetic acid	3.9	174.054	234.5	C10H9NO3	POS	3.34451e+07
Nicotinamide	3.9	123.055	90.1	C6H6N2O	POS	2.69871e+07
Hypoxanthine	3.9	137.046	50.7	C5H4N4O	POS	4.26705e+06
3-Hydroxy-2-methylpyridine	3.9	110.06	48.3	C6H7NO	POS	5.35393e+06
1-Methylpyrrolidine	3.9	86.0963	41	C5H11N	POS	1.63853e+07
PC(36:3)	3.9	784.583	546.4	C44H82NO8P	POS	6.00913e+06
Tetracosanoic acid	3.9	367.358	581.1	C24H48O2	NEG	474372
5-(4-carboxy-3-methyl-butyl)-1,4a-dimethyl-6-methylene-decalin-1-carboxylic acid	3.9	335.223	446.7	C20H32O4	NEG	4.08323e+07
Terminolic acid	3.9	503.339	406.1	C30H48O6	NEG	4.23543e+06
2-(3,4-dihydroxyphenyl)-5-hydroxy-7-methoxy-chroman-4-one	3.9	301.072	372.9	C16H14O6	NEG	5.29949e+07
3H-1,3-benzothiazol-2-one	3.9	150.002	336.7	C7H5NOS	NEG	3.97307e+08
3-(3,4-dihydroxyphenyl)-2-[(E)-3-(4-hydroxy-3-methoxy-phenyl)prop-2-enoyl]oxy-propanoic acid	3.9	373.093	312.2	C19H18O8	NEG	3.45999e+07
4-Hydroxycinnamic acid	3.9	163.04	295.2	C9H8O3	NEG	7.8189e+08
Quercetin 3-gentiobioside	3.9	625.142	277	C27H30O17	NEG	2.36107e+07
3,4-Dimethoxyphenol	3.9	153.056	257.3	C8H10O3	NEG	1.36573e+08
Idramantone	3.9	165.092	253.2	C10H14O2	NEG	8.44761e+06
3,4-Dihydroxybenzoic acid (Protocatechuic acid)	3.9	153.019	203.2	C7H6O4	NEG	4.4042e+09
Thymidine	3.9	241.083	130.2	C10H14N2O5	NEG	1.10437e+08
Itaconic acid	3.9	129.019	95.5	C5H6O4	NEG	1.4707e+07
Pyroglutamic acid	3.9	128.035	48	C5H7NO3	NEG	4.38559e+06
1,6-dihydroxy-3-methoxy-8-methyl-xanthen-9-one	3.9	271.061	36.7	C15H12O5	NEG	2.40359e+09
3-(carboxymethyl)benzoic acid	3.9	179.035	30.9	C9H8O4	NEG	5.01985e+07
Protocatechuic acid ethylester	3.9	181.05	32.8	C9H10O4	NEG	2.36709e+08
16-hydroxy-2,6,6,10,13,17-hexamethyl-20-methylene-14,18-dioxapentacyclo[11.6.1.01,16.02,11.05,10]icos-8-ene-7,15,19-trione	3.9	429.227	25.7	C25H32O6	POS	433041
(E)-9,12,13-trihydroxyoctadec-10-enoic acid	3.9	329.233	146.6	C18H34O5	NEG	2.49642e+09
Dethiobiotin	3.9	215.138	264.9	C10H18N2O3	POS	6.56187e+06
N-(3-Methylbut-2-EN-1-YL)-9H-purin-6-amine	3.9	204.124	54.1	C10H13N5	POS	8.2252e+07
Alminoprofen	3.9	220.133	47.8	C13H17NO2	POS	5.87733e+07
(1R,9S)-3-hydroxy-4,13-dimethoxy-17-methyl-17-azatetracyclo[7.5.3.01,10.02,7]heptadeca-2(7),3,5,10,13-pentaen-12-one	3.9	328.154	33.9	C19H21NO4	POS	9.76192e+07
(S)-Scoulerine	3.9	328.154	33.9	C19H21NO4	POS	9.76192e+07
(1R,7R,10R)-4,10,11,11-tetramethyltricyclo[5.3.1.01,5]undec-4-en-3-one	3.9	219.174	33.2	C15H22O	POS	9.05823e+07
(E)-5-(1,3-benzodioxol-5-yl)-1-(1-piperidyl)pent-2-en-1-one	3.9	288.159	33.1	C17H21NO3	POS	1.52262e+08
4-Hydroxy-3-methyl-6-(2-methyl-1,2,4a,5,6,7,8,8a-octahydronaphthalen-1-yl)pyran-2-one	3.9	275.164	31.5	C17H22O3	POS	1.43169e+07
D-Mannoheptulose	3.9	191.056	357.8	C7H14O7	NEG	2.95212e+06
3-hydroxy-4-(1,5,6-trihydroxy-1,5-dimethyl-hexyl)benzoic acid	3.9	297.134	261.7	C15H22O6	NEG	4.05294e+06
Phenylacetylglutamine	3.9	263.104	238.1	C13H16N2O4	NEG	1.79614e+06
3-Hydroxyisovaleric acid	3.9	117.056	187	C5H10O3	NEG	1.77932e+07
2-(3,4-dihydroxyphenyl)-5-hydroxy-7-methoxy-3-[(2S,3R,4S,5S,6R)-3,4,5-trihydroxy-6-[[(2R,3R,4R,5R,6S)-3,4,5-trihydroxy-6-methyl-tetrahydropyran-2-yl]oxymethyl]tetrahydropyran-2-yl]oxy-chromen-4-one	3.89	625.175	304.3	C28H32O16	POS	1.20965e+08
(2R,3S,4S,5R,6R)-2-(hydroxymethyl)-6-[(2S,3R,4S,5S,6R)-3,4,5-trihydroxy-6-(hydroxymethyl)tetrahydropyran-2-yl]oxy-tetrahydropyran-3,4,5-triol	3.89	341.109	42.8	C12H22O11	NEG	2.57867e+07
Turanose	3.89	341.109	42.8	C12H22O11	NEG	2.57867e+07
Palatinose (hydrate)	3.89	341.109	42.8	C12H22O11	NEG	2.57867e+07
(10S,11R)-1,10,11-trihydroxy-9-(hydroxymethyl)-1,2,6a,6b,9,12a-hexamethyl-2,3,4,5,6,6a,7,8,8a,10,11,12,13,14b-tetradecahydropicene-4a-carboxylic acid	3.89	503.339	406.1	C30H48O6	NEG	4.23543e+06
(1S,4aR,6aS,6bR,9R,10R,11R,12aR,14bS)-1,10,11-trihydroxy-9-(hydroxymethyl)-2,2,6a,6b,9,12a-hexamethyl-1,3,4,5,6,6a,7,8,8a,10,11,12,13,14b-tetradecahydropicene-4a-carboxylic acid	3.89	503.339	406.1	C30H48O6	NEG	4.23543e+06
LPC(18:2/0:0)	3.89	520.339	495.4	C26H50NO7P	POS	6.80532e+07
tributyl 2-acetoxypropane-1,2,3-tricarboxylate	3.89	403.232	492.6	C20H34O8	POS	9.78444e+07
Atrazine	3.89	216.102	370.7	C8H14ClN5	POS	1.69249e+08
1,3-Dimethyluracil	3.89	141.066	143.2	C6H8N2O2	POS	2.84399e+07
Isonicotinic acid	3.89	124.039	48.4	C6H5NO2	POS	2.79433e+06
5-chloro-2,4-dihydroxy-6-methyl-3-[(E)-3-methyl-5-[(1S,2R,6R)-1,2,6-trimethyl-3-oxo-cyclohexyl]pent-2-enyl]benzaldehyde	3.89	405.186	488.2	C23H31ClO4	NEG	1.27866e+07
6,9a,11a-Trimethyl-4-oxo-1,2,3a,3b,5,5a,7,8,9,9b,10,11-dodecahydronaphtho[1,2-g][1]benzofuran-6-carboxylic acid	3.89	333.207	408.3	C20H30O4	NEG	3.88632e+07
(1S,5R,9S,12S)-16-isopropyl-5,9-dimethyl-13,14-dioxatetracyclo[10.2.2.01,10.04,9]hexadec-15-ene-5-carboxylic acid	3.89	333.207	408.3	C20H30O4	NEG	3.88632e+07
4-Isopropylbenzoic acid	3.89	163.077	396.8	C10H12O2	NEG	6.56365e+06
4-Methylsalicylic acid	3.89	151.04	340.7	C8H8O3	NEG	3.29254e+08
3-[(2S,3R,4R,5S,6S)-3,5-dihydroxy-6-methyl-4-[(2S,3R,4S,5S,6R)-3,4,5-trihydroxy-6-(hydroxymethyl)tetrahydropyran-2-yl]oxy-tetrahydropyran-2-yl]oxy-5,7-dihydroxy-2-(4-hydroxyphenyl)chromen-4-one	3.89	593.152	306.6	C27H30O15	NEG	8.23624e+08
Rutin	3.89	609.147	292.5	C27H30O16	NEG	1.42759e+08
Veratric acid	3.89	181.051	279.3	C9H10O4	NEG	2.86451e+08
2-acetylbenzoic acid	3.89	163.04	244.8	C9H8O3	NEG	5.34875e+07
3-methoxy-4-[3,4,5-trihydroxy-6-(hydroxymethyl)tetrahydropyran-2-yl]oxy-benzoic acid	3.89	329.088	200.6	C14H18O9	NEG	1.00849e+07
2,3,4-Trihydroxybenzoic acid	3.89	169.014	110.1	C7H6O5	NEG	1.46176e+07
Deoxyguanosine	3.89	266.09	102.8	C10H13N5O4	NEG	5.80623e+06
Vanillylmandelic acid	3.89	197.046	86.6	C9H10O5	NEG	7.69524e+06
2-Methylvaleric acid	3.89	115.076	62	C6H12O2	NEG	7.77543e+07
2-Pyrimidinylacetic acid	3.89	139.05	301.8	C6H6N2O2	POS	3.3534e+06
2',4',6'-Trihydroxyacetophenone	3.89	167.035	57.7	C8H8O4	NEG	1.36391e+08
(4aS)-6,7-dihydroxy-1,1,4a-trimethyl-3,4,10,10a-tetrahydro-2H-phenanthren-9-one	3.89	275.164	31.5	C17H22O3	POS	1.43169e+07
Sph(t18:0)	3.89	318.3	146.3	C18H39NO3	POS	2.67931e+08
Securinine	3.89	218.117	49.2	C13H15NO2	POS	1.11211e+08
Acetylleucine	3.89	172.098	206	C8H15NO3	NEG	1.48444e+07
Citraconic acid	3.89	129.019	49.8	C5H6O4	NEG	6.1875e+07
Hydroxytyrosol	3.89	153.055	47.4	C8H10O3	NEG	4.85664e+07
(1S,8R,9R)-8-hydroxy-4-isopropylidene-10-oxatricyclo[7.2.1.01,5]dodecane-8-carboxylic acid	3.89	265.145	45.4	C15H22O4	NEG	1.98444e+07
Tetrahydrocorticosterone	3.89	349.239	30.4	C21H34O4	NEG	566303
Ketoleucine	3.88	129.056	267.7	C6H10O3	NEG	9.29035e+06
(E)-6-hydroxyoctadec-4-enoic acid	3.88	297.244	493.5	C18H34O3	NEG	1.51355e+09
Robinin	3.88	741.223	284.7	C33H40O19	POS	1.10455e+08
4-(Methylamino)butanoic acid	3.88	116.072	44.3	C5H11NO2	NEG	6.47453e+06
(3S,4R,5R)-1,3,4,5-tetrahydroxy-6-[(2S,3R,4S,5S,6R)-3,4,5-trihydroxy-6-(hydroxymethyl)tetrahydropyran-2-yl]oxy-hexan-2-one	3.88	341.109	42.8	C12H22O11	NEG	2.57867e+07
(2R,3S,4R,5R)-2,3,4,5-tetrahydroxy-6-[(2R,3R,4S,5S,6R)-3,4,5-trihydroxy-6-(hydroxymethyl)tetrahydropyran-2-yl]oxy-hexanal	3.88	341.109	42.8	C12H22O11	NEG	2.57867e+07
Galactinol	3.88	341.109	42.8	C12H22O11	NEG	2.57867e+07
D-Panose	3.88	503.162	43.5	C18H32O16	NEG	3.86474e+06
LPC(18:1)	3.88	522.355	517.3	C26H52NO7P	POS	1.12794e+07
α-Cyperone	3.88	219.174	464.3	C15H22O	POS	1.71273e+07
Ethylvanillin	3.88	167.07	293.9	C9H10O3	POS	7.22237e+07
Isoscopoletin	3.88	193.049	283	C10H8O4	POS	1.13773e+08
3'-O-Methyladenosine	3.88	282.118	204.5	C11H15N5O4	POS	775243
Kojic acid	3.88	143.034	90.1	C6H6O4	POS	7.62368e+06
2-hydroxy-1',4,4'a-trimethyl-5'-oxo-4-vinyl-spiro[cyclopentane-1,6'-decalin]-1'-carboxylic acid	3.88	333.208	432.4	C20H30O4	NEG	6.83997e+07
2-(3,4-dihydroxyphenyl)-5,7-dihydroxy-chroman-4-one	3.88	287.057	337.2	C15H12O6	NEG	3.48197e+07
3-Methoxyphenylacetic acid	3.88	165.056	316.4	C9H10O3	NEG	4.16176e+08
Clitorin	3.88	739.21	284.8	C33H40O19	NEG	1.18185e+08
Salicyluric acid	3.88	194.046	271.3	C9H9NO4	NEG	2.50563e+07
2-hydroxy-3,4-dimethoxy-benzoic acid	3.88	197.046	257.4	C9H10O5	NEG	7.16948e+09
Chorismic acid	3.88	225.041	210.2	C10H10O6	NEG	6.97853e+07
Ethylmalonic acid	3.88	131.035	120.8	C5H8O4	NEG	9.57908e+07
Brucine	3.88	395.196	195.4	C23H26N2O4	POS	2.45355e+07
Lauramine oxide	3.88	230.247	164.2	C14H31NO	POS	3.10907e+07
N-(2-phenylethyl)acetamide	3.88	164.107	34.9	C10H13NO	POS	2.34038e+08
3-isopropyl-2,3,6,7,8,8a-hexahydropyrrolo[1,2-a]pyrazine-1,4-dione	3.88	197.128	34.5	C10H16N2O2	POS	1.97711e+07
3-heptyl-8-hydroxy-6-oxo-3,4-dihydroisochromene-7-carboxylic acid	3.88	307.154	23.8	C17H22O5	POS	745929
trans-11-Eicosenoic acid	3.88	309.28	342.9	C20H38O2	NEG	1.22679e+07
2-hexoxy-6-[(3,4,5-trihydroxytetrahydropyran-2-yl)oxymethyl]tetrahydropyran-3,4,5-triol	3.88	377.181	244.7	C17H32O10	NEG	2.74868e+07
(1R,3R,4S,5R)-1,3,4-trihydroxy-5-[(E)-3-(4-hydroxyphenyl)prop-2-enoyl]oxy-cyclohexanecarboxylic acid	3.88	319.082	239.9	C16H18O8	NEG	9.38522e+06
7-hydroxy-2-(4-hydroxyphenyl)-5-[(2S,3R,4S,5S,6R)-3,4,5-trihydroxy-6-(hydroxymethyl)tetrahydropyran-2-yl]oxy-chroman-4-one	3.88	433.114	182.5	C21H22O10	NEG	2.47623e+07
1-(4-hydroxy-1,3-dihydroisobenzofuran-1-yl)butane-2,3-diol	3.88	223.097	42.5	C12H16O4	NEG	1.69797e+08
Pratensein	3.88	299.057	36.7	C16H12O6	NEG	2.93627e+08
3-[(2S,3R,4S,5R,6R)-3,5-dihydroxy-6-(hydroxymethyl)-4-[(2S,3R,4R,5R,6S)-3,4,5-trihydroxy-6-methyl-tetrahydropyran-2-yl]oxy-tetrahydropyran-2-yl]oxy-5,7-dihydroxy-2-(4-hydroxyphenyl)chromen-4-one	3.87	595.165	306.6	C27H30O15	POS	5.27233e+08
7-Methoxy-4-methylcoumarin	3.87	191.07	334.9	C11H10O3	POS	6.74747e+07
(2E)-2-hexylidene-3-methyl-butanedioic acid	3.87	213.113	412	C11H18O4	NEG	2.73108e+07
Artemetin	3.87	387.109	375.8	C20H20O8	NEG	2.34044e+07
(Z)-6,9,10-trihydroxyoctadec-7-enoic acid	3.87	329.234	406.8	C18H34O5	NEG	4.77704e+08
5-Aminopentanoic acid	3.87	116.072	44.3	C5H11NO2	NEG	6.47453e+06
3-Pyridinemethanol	3.87	110.06	48.3	C6H7NO	POS	5.35393e+06
Baimaside	3.87	625.142	277	C27H30O17	NEG	2.36107e+07
1-(4-hydroxy-3-methoxy-phenyl)-7-phenyl-heptan-3-one	3.87	313.18	420.9	C20H24O3	POS	4.78699e+07
3-(1H-benzimidazol-2-yl)-7-(diethylamino)chromen-2-one	3.87	334.154	391.2	C20H19N3O2	POS	8.8378e+07
1-BCP	3.87	234.112	355.4	C13H15NO3	POS	2.54835e+07
N-Phenylacetamide	3.87	136.076	275.4	C8H9NO	POS	3.00032e+07
Caffeine	3.87	195.087	241.7	C8H10N4O2	POS	4.9218e+07
3-Succinoylpyridine	3.87	180.065	226.7	C9H9NO3	POS	3.52112e+08
(2R,3R,4S,5S)-2-(6-aminopurin-9-yl)-5-(methylsulfinylmethyl)tetrahydrofuran-3,4-diol	3.87	314.091	114.5	C11H15N5O4S	POS	4.15094e+09
2-Aminopurine	3.87	136.061	72.1	C5H5N5	POS	1.18614e+08
N,N-Diethyl-2-aminoethanol	3.87	118.122	44	C6H15NO	POS	4.09954e+07
(1S,4S,5R,9S,10R,13R,14R)-5-(acetoxymethyl)-9-methyl-14-(2-methylpropanoyloxymethyl)tetracyclo[11.2.1.01,10.04,9]hexadecane-5-carboxylic acid	3.87	447.276	517.4	C26H40O6	NEG	1.09721e+07
12,15-Dihydroxy-13-methylhexadecanoic acid	3.87	301.239	416.3	C17H34O4	NEG	6.94949e+07
Colutehydroquinone	3.87	331.119	361	C18H20O6	NEG	9.82056e+06
Taxifolin	3.87	303.051	296.6	C15H12O7	NEG	4.12625e+07
N-Acetylphenylalanine	3.87	206.082	268.1	C11H13NO3	NEG	1.91738e+08
Vanillic acid	3.87	167.035	257.6	C8H8O4	NEG	1.63049e+09
1-[2,3-dihydroxy-4-[(2S,3R,4S,5S,6R)-3,4,5-trihydroxy-6-(hydroxymethyl)tetrahydropyran-2-yl]oxy-phenyl]ethanone	3.87	311.078	203.2	C14H18O9	NEG	6.18895e+06
Pyrrole-2-carboxaldehyde	3.87	94.0299	195.7	C5H5NO	NEG	1.18344e+07
Alanine	3.87	88.0403	338.9	C3H7NO2	NEG	1.88416e+06
2-Hydroxymethyl benzoic acid	3.87	151.04	88.1	C8H8O3	NEG	9.73831e+07
Protopine	3.87	354.133	57.2	C20H19NO5	POS	7.98043e+07
7-methoxy-6-(1,2,3-trihydroxy-3-methyl-butyl)chromen-2-one	3.87	295.117	23.7	C15H18O6	POS	721551
2-Methylhippuric acid	3.87	192.066	199.1	C10H11NO3	NEG	4.9204e+07
6-(hydroxymethyl)pyridin-3-ol	3.87	124.04	90.5	C6H7NO2	NEG	2.74997e+07
5,7-dihydroxy-4-(4-methoxyphenyl)chroman-2-one	3.87	285.076	38.3	C16H14O5	NEG	7.74482e+07
(3aR,5S,5aS,8R,8aS,9aR)-8-hydroxy-5,8a-dimethyl-1-methylene-3a,4,5,5a,6,8,9,9a-octahydroazuleno[6,5-b]furan-2,7-dione	3.87	263.129	35	C15H20O4	NEG	4.69923e+07
beta-Chamigrenic acid	3.86	233.155	495.2	C15H22O2	NEG	1.78966e+07
7-hydroxy-2-(4-hydroxyphenyl)chroman-4-one	3.86	255.066	337.9	C15H12O4	NEG	3.10667e+07
3-[4,5-dihydroxy-3-(3,4,5-trihydroxy-6-methyl-tetrahydropyran-2-yl)oxy-6-[(3,4,5-trihydroxy-6-methyl-tetrahydropyran-2-yl)oxymethyl]tetrahydropyran-2-yl]oxy-5,7-dihydroxy-2-(4-hydroxyphenyl)chromen-4-one	3.86	741.223	284.7	C33H40O19	POS	1.10455e+08
(2S,3S,4S,5R,6S)-3,4,5-trihydroxy-6-[2-hydroxy-5-(3,5,7-trihydroxy-4-oxo-chromen-2-yl)phenoxy]tetrahydropyran-2-carboxylic acid	3.86	477.068	306.2	C21H18O13	NEG	2.33806e+06
3-Methylglutaric acid	3.86	145.051	209.9	C6H10O4	NEG	4.3458e+08
Blumeatin	3.86	301.072	372.9	C16H14O6	NEG	5.29949e+07
Dibutyl sebacate	3.86	315.252	528.3	C18H34O4	POS	1.08058e+07
8-[3-oxo-2-[(E)-pent-2-enyl]cyclopenten-1-yl]octanoic acid	3.86	275.2	448.3	C18H28O3	POS	5.25803e+07
3-Methoxyflavone	3.86	235.075	415.1	C16H12O3	POS	1.41474e+06
Testosterone	3.86	289.216	413.6	C19H28O2	POS	7.82778e+07
2-pentyl-1H-quinolin-4-one	3.86	216.138	377.1	C14H17NO	POS	9.43844e+07
SD-169	3.86	161.071	252.3	C9H8N2O	POS	4.45741e+06
Octenedioylcarnitine (Car(8:1-O2))	3.86	316.175	212.3	C15H25NO6	POS	2.1755e+08
(2S,3R,4S,5R)-2-Amino-3,4,5,6-tetrahydroxyhexanal hydrochloride	3.86	162.076	35.9	C6H13NO5	POS	7.34869e+06
(1R,2R,4aR,8aS)-1-[2-(3-furyl)ethyl]-2,4a,5-trimethyl-2,3,4,7,8,8a-hexahydronaphthalene-1-carboxylic acid	3.86	315.197	449	C20H28O3	NEG	1.248e+07
(10Z,13Z)-15,16-dihydroxyoctadeca-10,13-dienoic acid	3.86	311.223	435.8	C18H32O4	NEG	2.56284e+09
2-(1-carboxyethyl)-5-methyl-cyclopentanecarboxylic acid	3.86	199.098	309.2	C10H16O4	NEG	9.57371e+08
Methyl 5-hydroxypyridine-2-carboxylate	3.86	152.035	226.1	C7H7NO3	NEG	5.43694e+07
Isobutyrylglycine	3.86	144.067	124.7	C6H11NO3	NEG	852842
3'-O-Methyluridine	3.86	257.078	90.3	C10H14N2O6	NEG	1.23033e+07
2-Hydroxyglutaric acid	3.86	147.03	61.4	C5H8O5	NEG	1.53145e+07
Xanthine	3.86	151.026	48.9	C5H4N4O2	NEG	385950
Uridine	3.86	243.062	48.4	C9H12N2O6	NEG	1.18707e+06
2-Ethylbutyric acid	3.86	115.076	62	C6H12O2	NEG	7.77543e+07
5-hydroxy-2-(4-hydroxyphenyl)-6,7,8-trimethoxy-chromen-4-one	3.86	345.096	23.2	C18H16O7	POS	203791
(12Z,15Z)-10-hydroxyoctadeca-12,15-dienoic acid	3.86	295.228	50.3	C18H32O3	NEG	1.32142e+08
5-(5-methoxycarbonyl-5,8a-dimethyl-2-methylene-decalin-1-yl)-3-methyl-pentanoic acid	3.86	349.239	30.4	C21H34O4	NEG	566303
2-(3,4-dihydroxyphenyl)-5-hydroxy-7-[(2S,3R,4S,5S,6R)-3,4,5-trihydroxy-6-[[(2R,3R,4R,5R,6S)-3,4,5-trihydroxy-6-methyl-tetrahydropyran-2-yl]oxymethyl]tetrahydropyran-2-yl]oxy-chromen-4-one	3.86	595.165	311.8	C27H30O15	POS	4.83028e+06
Decadienedioylcarnitine (Car(10:2-O2))	3.86	342.19	277.5	C17H27NO6	POS	2.58732e+07
2-[2-[(Z)-pent-2-enyl]-3-[3,4,5-trihydroxy-6-(hydroxymethyl)tetrahydropyran-2-yl]oxy-cyclopentyl]acetic acid	3.86	373.186	289	C18H30O8	NEG	1.51244e+07
Dodecyl gallate	3.86	337.205	22.9	C19H30O5	NEG	9.51161e+08
Eicosapentaenoic acid	3.85	301.217	542.2	C20H30O2	NEG	1.80334e+08
Scopolin	3.85	353.088	237.4	C16H18O9	NEG	3.68984e+08
3-[4,5-dihydroxy-3-[(2R,3R,4R,5R,6S)-3,4,5-trihydroxy-6-methyl-tetrahydropyran-2-yl]oxy-6-[[(2R,3R,4R,5R,6S)-3,4,5-trihydroxy-6-methyl-tetrahydropyran-2-yl]oxymethyl]tetrahydropyran-2-yl]oxy-5,7-dihydroxy-2-(4-hydroxyphenyl)chromen-4-one	3.85	741.223	284.7	C33H40O19	POS	1.10455e+08
5-Oxooctanoic acid	3.85	157.087	286.5	C8H14O3	NEG	3.01739e+08
2'-O-Methyladenosine	3.85	282.118	204.5	C11H15N5O4	POS	775243
NAE(16:0)	3.85	300.289	537.8	C18H37NO2	POS	1.40393e+07
MG(18:3)	3.85	353.268	480.1	C21H36O4	POS	5.00645e+07
Entinostat	3.85	359.148	278.3	C21H20N4O3	POS	1.36253e+08
4-methoxy-6-methyl-7,8-dihydro-5H-[1,3]dioxolo[4,5-g]isoquinoline	3.85	222.112	191.3	C12H15NO3	POS	2.2642e+07
Tyramine	3.85	120.081	51.4	C8H11NO	POS	1.05473e+07
Isomaltose	3.85	325.112	41.9	C12H22O11	POS	1.88638e+07
7-Hydroxydihydrobotrydial	3.85	309.171	326.7	C17H28O6	NEG	4.68475e+06
2,3-bis[(4-hydroxy-3-methoxy-phenyl)methyl]butane-1,4-diol	3.85	361.166	307.5	C20H26O6	NEG	9.64434e+09
Actarit	3.85	192.067	265.1	C10H11NO3	NEG	2.54439e+08
Magnolioside	3.85	353.088	252	C16H18O9	NEG	1.95419e+08
14-methyl-7,9,20,22-tetraoxa-14-azapentacyclo[15.7.0.04,12.06,10.019,23]tetracosa-1(24),4,6(10),11,17,19(23)-hexaen-2-one	3.85	354.133	57.2	C20H19NO5	POS	7.98043e+07
PC(18:0)	3.85	520.339	216.4	C26H52NO8P	POS	7.17021e+07
Lappaconine	3.85	424.269	207.7	C23H37NO6	POS	2.94461e+06
Harmine	3.85	213.102	35	C13H12N2O	POS	7.70559e+07
2-[(3-oxo-3-phenyl-propyl)amino]acetic acid	3.85	208.096	178.3	C11H13NO3	POS	1.34687e+08
3,5-Dihydroxybenzoic acid	3.85	153.019	244.2	C7H6O4	NEG	5.47027e+08
Melibiose	3.84	341.109	42.8	C12H22O11	NEG	2.57867e+07
Oleamide	3.84	282.278	546.4	C18H35NO	POS	6.24345e+08
Methyl caffeate	3.84	193.051	294.1	C10H10O4	NEG	6.08942e+08
LPC(18:0/0:0)	3.84	524.37	541.9	C26H54NO7P	POS	1.93552e+06
Linoleamide	3.84	280.263	526.1	C18H33NO	POS	7.34219e+07
6-hydroxy-4-methyl-chromen-2-one	3.84	177.054	273.5	C10H8O3	POS	3.9943e+07
(2E,4E)-1-(2,4-dihydroxy-3,5-dimethyl-phenyl)hexa-2,4-dien-1-one	3.84	231.103	424.8	C14H16O3	NEG	3.60359e+07
(10E,15Z)-9,12,13-trihydroxyoctadeca-10,15-dienoic acid	3.84	327.218	377.7	C18H32O5	NEG	1.58899e+09
1,3,8,9-tetrahydroxybenzofurano[3,2-c]chromen-6-one	3.84	299.02	346.2	C15H8O7	NEG	3.46385e+08
Helicin	3.84	283.082	239.2	C13H16O7	NEG	3.12705e+07
2-Hydroxyhexanedioic acid	3.84	143.035	89.1	C6H10O5	NEG	9.93373e+06
5,7-Dihydroxychromone	3.84	177.019	48.1	C9H6O4	NEG	9.15052e+08
Mono(2-ethylhexyl) phthalate	3.84	277.144	49.4	C16H22O4	NEG	3.1433e+07
Sph(d18:0)	3.84	302.305	112.9	C18H39NO2	POS	2.78246e+07
Dodecenedioylcarnitine (Car(12:1-O2))	3.84	372.237	327.3	C19H33NO6	POS	6.32254e+06
5-[(2S,3R,4S,5S,6R)-4,5-dihydroxy-6-(hydroxymethyl)-3-[(2S,3R,4R,5R,6S)-3,4,5-trihydroxy-6-methyl-tetrahydropyran-2-yl]oxy-tetrahydropyran-2-yl]oxy-7-hydroxy-2-(4-hydroxyphenyl)chromen-4-one	3.84	577.156	300.2	C27H30O14	NEG	13630.2
Neoamygdalin	3.84	456.151	245.9	C20H27NO11	NEG	648991
Kaempferol 3-neohesperidoside	3.83	595.165	306.6	C27H30O15	POS	5.27233e+08
(Z)-3-(4-hydroxyphenyl)-N-[4-[[(E)-3-(4-hydroxyphenyl)prop-2-enoyl]amino]butyl]prop-2-enamide	3.83	381.18	323.2	C22H24N2O4	POS	9.49246e+07
3,4-Dimethylbenzoic acid	3.83	149.061	389.7	C9H10O2	NEG	7.52869e+08
2-(2,6-dihydroxyphenyl)-3,5,7-trihydroxy-chromone	3.83	303.049	298.9	C15H10O7	POS	3.71768e+07
6-Hydroxyluteolin 7-glucoside	3.83	465.102	298.9	C21H20O12	POS	4.74444e+07
Oxodecenoylcarnitine (Car(10:2-O))	3.83	328.211	250.8	C17H29NO5	POS	5.15276e+07
5-Hydroxyindole	3.83	134.06	250.7	C8H7NO	POS	1.09972e+07
(4aS,6aR,6aS,6bR,8aR,10S,12aR,14bS)-10-hydroxy-1,2,6a,6b,9,9,12a-heptamethyl-4,5,6,6a,7,8,8a,10,11,12,13,14b-dodecahydro-3H-picene-4a-carboxylic acid	3.83	453.338	547.9	C30H46O3	NEG	6.90149e+06
(10E,12E)-9-hydroxyoctadeca-10,12-dienoic acid	3.83	277.217	493.1	C18H32O3	NEG	6.39266e+06
(10R,11R)-10,11-dihydroxy-9-(hydroxymethyl)-1,6a,6b,9,12a-pentamethyl-2-methylene-1,3,4,5,6,6a,7,8,8a,10,11,12,13,14b-tetradecahydropicene-4a-carboxylic acid	3.83	485.327	410.8	C30H46O5	NEG	3.39762e+06
3-hydroxy-2-octyl-pentanedioic acid	3.83	241.145	405.6	C13H24O5	NEG	4.42739e+07
poriol	3.83	285.077	395.9	C16H14O5	NEG	8.82756e+08
(3R,4R,6aR,6bS,8aS,14bR)-8a-[6-[[3,4-dihydroxy-6-(hydroxymethyl)-5-[(2S,3R,4R,5R,6S)-3,4,5-trihydroxy-6-methyl-tetrahydropyran-2-yl]oxy-tetrahydropyran-2-yl]oxymethyl]-3,4,5-trihydroxy-tetrahydropyran-2-yl]oxycarbonyl-3-hydroxy-4,6a,6b,11,11,14b-hexamethyl-1,2,3,4a,5,6,7,8,9,10,12,12a,14,14a-tetradecahydropicene-4-carboxylic acid	3.83	955.492	384.1	C48H76O19	NEG	3.62772e+06
(E)-3,10-dihydroxy-4,9-dimethyl-dodec-6-enedioic acid	3.83	287.15	313.7	C14H24O6	NEG	9.41979e+07
2-[(2-hydroxy-3-methyl-butanoyl)amino]-3-methyl-butanoic acid	3.83	216.124	293.5	C10H19NO4	NEG	4.6212e+07
Acetoacetic acid	3.83	101.024	41.1	C4H6O3	NEG	2.43996e+07
1-(1H-indol-3-yl)ethanone	3.83	160.075	40.3	C10H9NO	POS	1.64275e+07
(3aR,5S,7S,8R,8aS,9aR)-7,8-dihydroxy-5,8a-dimethyl-1-methylene-4,5,5a,6,7,8,9,9a-octahydro-3aH-azuleno[6,5-b]furan-2-one	3.83	265.145	45.4	C15H22O4	NEG	1.98444e+07
Decenedioylcarnitine (Car(10:1-O2))	3.83	344.206	286.4	C17H29NO6	POS	5.20669e+06
Acetaminophen	3.83	150.056	26.3	C8H9NO2	NEG	486819
Maltotriose	3.82	503.162	43.5	C18H32O16	NEG	3.86474e+06
Glucosamine	3.82	162.076	35.9	C6H13NO5	POS	7.34869e+06
Cellobiose	3.82	325.112	41.9	C12H22O11	POS	1.88638e+07
PC(18:1(9Z)/18:1(9Z))	3.82	786.599	603.4	C44H84NO8P	POS	6.77305e+06
3-hydroxy-5,5-bis(hydroxymethyl)-9,13-dimethyl-pentacyclo[11.2.1.01,10.04,9.012,14]hexadecan-7-one	3.82	317.211	408.6	C20H30O4	POS	4.81573e+07
(2R,3S,4S,5R,6R)-2-(hydroxymethyl)-6-(2-phenylethoxy)tetrahydropyran-3,4,5-triol	3.82	285.133	279.6	C14H20O6	POS	6.11976e+08
Dopamine	3.82	136.075	51.2	C8H11NO2	POS	3.66995e+07
2-Methylbenzoic acid	3.82	135.045	359.5	C8H8O2	NEG	3.53363e+07
Choerospondin	3.82	433.114	324.9	C21H22O10	NEG	1.13057e+08
(E)-2,7-dimethyl-8-[(2R,3R,4S,5S,6R)-3,4,5-trihydroxy-6-(hydroxymethyl)oxan-2-yl]oxydec-4-enedioic acid	3.82	405.177	306.1	C18H30O10	NEG	4.30431e+07
5,7-dihydroxy-3-[(2S,3R,4S,5R,6R)-3,4,5-trihydroxy-6-(hydroxymethyl)tetrahydropyran-2-yl]oxy-2-(3,4,5-trihydroxyphenyl)chromen-4-one	3.82	479.084	283	C21H20O13	NEG	2.17613e+07
(2S,3R,4R,5R,6R)-2-methyl-6-[[(2R,3S,4S,5R,6R)-3,4,5-trihydroxy-6-(2-phenylethoxy)tetrahydropyran-2-yl]methoxy]tetrahydropyran-3,4,5-triol	3.82	429.177	279.2	C20H30O10	NEG	2.86699e+07
(1S,3R,4R,5R)-1,3,4-trihydroxy-5-[(E)-3-(4-hydroxy-3-methoxy-phenyl)prop-2-enoyl]oxy-cyclohexanecarboxylic acid	3.82	367.103	262.2	C17H20O9	NEG	1.20566e+08
7-[(2S,3R,4S,5S,6R)-4,5-dihydroxy-6-(hydroxymethyl)-3-[(2S,3R,4R,5R,6S)-3,4,5-trihydroxy-6-methyl-tetrahydropyran-2-yl]oxy-tetrahydropyran-2-yl]oxy-3,5-dihydroxy-2-(4-hydroxyphenyl)chromen-4-one	3.82	595.165	255.4	C27H30O15	POS	2.33049e+08
3-[4,5-dihydroxy-6-(hydroxymethyl)-3-[(2S,3R,4R,5R,6S)-3,4,5-trihydroxy-6-methyl-tetrahydropyran-2-yl]oxy-tetrahydropyran-2-yl]oxy-5,7-dihydroxy-2-(4-hydroxyphenyl)chromen-4-one	3.82	595.165	255.4	C27H30O15	POS	2.33049e+08
2-[(3S,3aR,5R,7aS)-3a-acetyl-3-hydroxy-7a-methyl-2,3,4,5,6,7-hexahydro-1H-inden-5-yl]prop-2-enoic acid	3.82	265.145	45.4	C15H22O4	NEG	1.98444e+07
(2Z,4E)-5-[(1R,3R,5S,8S)-3,8-dihydroxy-1,5-dimethyl-6-oxabicyclo[3.2.1]octan-8-yl]-3-methyl-penta-2,4-dienoic acid	3.82	281.139	265.2	C15H22O5	NEG	8.245e+06
2-(1-hydroxypropan-2-yl)-3,3,6-trimethyl-5,6-dihydro-2H-1-benzofuran-7-carbaldehyde	3.82	249.149	26	C15H22O3	NEG	1.82397e+07
(2S)-5,7-dimethoxy-2-(4-methoxyphenyl)chroman-4-one	3.82	313.108	21.5	C18H18O5	NEG	2.15563e+06
Lonicerin	3.81	595.165	306.6	C27H30O15	POS	5.27233e+08
(3R,4S,5S,6R)-6-[[(2S,3R,4S,5R,6R)-3,4,5-trihydroxy-6-[[(2S,3R,4S,5R,6R)-3,4,5-trihydroxy-6-(hydroxymethyl)tetrahydropyran-2-yl]oxymethyl]tetrahydropyran-2-yl]oxymethyl]tetrahydropyran-2,3,4,5-tetrol	3.81	503.162	43.5	C18H32O16	NEG	3.86474e+06
Isohomovanillic acid	3.81	181.051	234	C9H10O4	NEG	1.95194e+08
3-Amino-4-hydroxybenzoic acid	3.81	154.049	91.3	C7H7NO3	POS	1.53356e+07
Oxypurinol	3.81	151.026	48.9	C5H4N4O2	NEG	385950
Hoechst 33342	3.81	453.238	291	C27H28N6O	POS	7.53658e+08
Guvacine	3.81	128.07	51.8	C6H9NO2	POS	1.02086e+07
(E)-6-(1,3-dihydroxy-4,4,8,10,14-pentamethyl-2,3,5,6,7,9,11,15,16,17-decahydro-1H-cyclopenta[a]phenanthren-17-yl)-2-methyl-hept-2-enoic acid	3.81	471.349	532.7	C30H48O4	NEG	4.90067e+06
18α-Glycyrrhetinic acid	3.81	469.334	520	C30H46O4	NEG	1.18672e+07
(E)-5-[(1S,4aR,8aR)-2-formyl-5,5,8a-trimethyl-1,4,4a,6,7,8-hexahydronaphthalen-1-yl]-3-(acetoxymethyl)pent-2-enoic acid	3.81	357.207	451.1	C22H32O5	NEG	1.29214e+07
GeloMulideN	3.81	431.209	381.6	C24H32O7	NEG	1.06968e+06
Nialamide	3.81	279.124	311.6	C16H18N4O2	NEG	1.09351e+08
N-Tigloylglycine	3.81	156.067	180.7	C7H11NO3	NEG	8.763e+06
N-Lactoyl-Phenylalanine	3.81	236.093	301.1	C12H15NO4	NEG	8.72623e+07
(1R,2S,5R,8R,9R,10R,13R,17S)-9-hydroxy-1,13-dimethyl-6-methylene-11-oxapentacyclo[8.6.1.15,8.02,8.013,17]octadecan-12-one	3.81	315.196	53.9	C20H28O3	NEG	2.91612e+07
Rubiadin-1-methyl ether	3.81	269.08	46.9	C16H12O4	POS	1.32151e+08
trans-3'-Hydroxycotinine	3.81	193.097	47.1	C10H12N2O2	POS	6.96545e+06
Glucovanillin	3.81	295.082	120.7	C14H18O8	NEG	1.45203e+07
[(5E)-3,4-dihydroxy-10-oxo-2-propyl-2,3,4,7,8,9-hexahydrooxecin-9-yl] (2E,4E)-hexa-2,4-dienoate	3.81	337.166	51.5	C18H26O6	NEG	1.20077e+07
[2-(hydroxymethyl)-3-methoxy-4-methyl-5-(3-methylbut-2-enoxy)phenyl]methanol	3.81	265.147	23.9	C15H22O4	NEG	1.0925e+10
9-methoxy-4,4-dimethyl-13-phenyl-6,14-dioxatetracyclo[8.4.0.02,7.03,5]tetradeca-1,7,9-trien-11-one	3.81	335.13	20.9	C21H20O4	NEG	3.4253e+08
2-indolecarboxylic-acid	3.8	160.04	317.1	C9H7NO2	NEG	8.21137e+07
Erucamide	3.8	338.341	590.3	C22H43NO	POS	1.22528e+09
Indole	3.8	118.065	389.6	C8H7N	POS	3.86447e+06
Propiverine (hydrochloride)	3.8	368.22	366.2	C23H29NO3	POS	8.43475e+06
6-Hydroxymelatonin	3.8	249.123	261.8	C13H16N2O3	POS	6.96048e+07
Monocrotaline	3.8	326.159	94.2	C16H23NO6	POS	2.16775e+07
N-Lauroylglycine	3.8	256.192	488.2	C14H27NO3	NEG	4.35362e+07
12(S)-HHTrE	3.8	279.197	442.5	C17H28O3	NEG	2.09058e+07
Propyl paraben	3.8	179.071	404.9	C10H12O3	NEG	2.23094e+07
5-[[(2R,3S,4S,5R,6R)-6-(1-ethylhexoxy)-3,4,5-trihydroxy-tetrahydropyran-2-yl]methoxy]-3-hydroxy-3-methyl-5-oxo-pentanoic acid	3.8	435.225	388.3	C20H36O10	NEG	8.06243e+07
(2S,3S)-3,5,7-trihydroxy-2-(4-hydroxyphenyl)chroman-4-one	3.8	287.056	317.7	C15H12O6	NEG	3.3088e+08
4-hydroxy-4-[(E)-3-hydroxybut-1-enyl]-3,5,5-trimethyl-cyclohex-2-en-1-one	3.8	223.134	279.9	C13H20O3	NEG	4.11971e+07
Isoviolanthin	3.8	577.156	300.2	C27H30O14	NEG	13630.2
Harmaline	3.8	215.117	202.5	C13H14N2O	POS	1.52254e+08
Mitraphylline	3.8	369.18	48	C21H24N2O4	POS	5.79924e+07
6-(6,8-dihydroxy-7-methoxy-3-methyl-1-oxo-isochroman-4-yl)oxy-4,8-dihydroxy-7-methoxy-3-methyl-isochroman-1-one	3.8	445.112	20.9	C22H22O11	POS	29208.7
Momordin Ic	3.8	763.427	264.1	C41H64O13	NEG	3.65791e+06
2-Ketobutyric acid	3.8	101.024	109	C4H6O3	NEG	1.88526e+07
3,5-Dimethoxycinnamic acid	3.8	207.066	105.1	C11H12O4	NEG	1.00447e+08
Flopropione	3.8	181.05	61.2	C9H10O4	NEG	9.93007e+07
(1S,3R,4R,5R)-1,3-bis[[(E)-3-(3,4-dihydroxyphenyl)prop-2-enoyl]oxy]-4,5-dihydroxy-cyclohexanecarboxylic acid	3.79	499.123	296.4	C25H24O12	POS	2.45645e+06
2-hydroxy-3-methoxy-benzaldehyde	3.79	151.04	276	C8H8O3	NEG	4.59353e+08
cis-Jasmone	3.79	165.127	390	C11H16O	POS	4.19894e+08
methyl 1-methyl-2'-oxo-spiro[1,4a,5,5a,7,8,10,10a-octahydropyrano[3,4-f]indolizine-6,3'-indoline]-4-carboxylate	3.79	369.18	302.1	C21H24N2O4	POS	1.73559e+07
Rhodiosin	3.79	611.16	292.8	C27H30O16	POS	4.69364e+07
3-Methyloxindole	3.79	130.065	275.2	C9H9NO	POS	1.63477e+07
3,7-Dimethyluric acid	3.79	179.056	137.6	C7H8N4O3	POS	2.96529e+07
Nicotinuric acid	3.79	181.06	123.2	C8H8N2O3	POS	3.72187e+07
Phytolaccoside A	3.79	647.381	422.1	C36H56O10	NEG	564387
Sumiki's-acid	3.79	141.019	87.6	C6H6O4	NEG	9.07402e+06
Xylose	3.79	131.035	20.2	C5H10O5	NEG	3.55495e+06
(E)-9,10-dihydroxytetradec-6-enedioic acid	3.79	287.15	365.1	C14H24O6	NEG	1.90093e+06
Ilexpernoside D	3.79	663.375	313	C36H56O11	NEG	107376
2,6-dihydroxy-4-(2-hydroxy-1-methyl-propyl)-3-methyl-benzoic acid	3.79	239.092	45.6	C12H16O5	NEG	1.30114e+08
6-[(2E)-3,7-dimethylocta-2,6-dienyl]-7-hydroxy-chromen-2-one	3.79	297.152	26.6	C19H22O3	NEG	3.70272e+09
3,5-dihydroxy-2-(3-hydroxy-4-methoxy-phenyl)-7-methoxy-chromen-4-one	3.78	331.081	389.6	C17H14O7	POS	1.3494e+08
Quillaic acid	3.78	485.328	482.7	C30H46O5	NEG	2.55889e+07
Methylmalonic acid	3.78	117.019	59.7	C4H6O4	NEG	3.54591e+07
Ribose	3.78	131.035	20.2	C5H10O5	NEG	3.55495e+06
MG(18:2)	3.78	355.284	501.2	C21H38O4	POS	1.65527e+07
Pilocarpine	3.78	209.128	52.2	C11H16N2O2	POS	6.5278e+06
5,5,6b-trimethyl-3a,4,6,6a-tetrahydro-1H-cyclopropa[e]indene-1a,2-dicarboxylic acid	3.78	263.129	433.3	C15H20O4	NEG	9.06484e+06
(1S,2Z,10R)-11,11-dimethyl-7-methylidene-6-oxobicyclo[8.1.0]undec-2-ene-3-carboxylic acid	3.78	247.134	423.6	C15H20O3	NEG	2.11314e+07
Nordihydroguaiaretic acid	3.78	301.144	418	C18H22O4	NEG	2.15567e+07
(E)-2-[4-[(E)-2-carboxyvinyl]-2-methoxy-phenoxy]-3-(4-hydroxy-3-methoxy-phenyl)prop-2-enoic acid	3.78	385.093	334.4	C20H18O8	NEG	1.92356e+07
2-[(1R,2R)-3-oxo-2-[(Z)-5-[3,4,5-trihydroxy-6-(hydroxymethyl)tetrahydropyran-2-yl]oxypent-2-enyl]cyclopentyl]acetic acid	3.78	387.166	252	C18H28O9	NEG	1.91778e+08
3,5-dimethoxy-4-[(2S,3R,4S,5S,6R)-3,4,5-trihydroxy-6-(hydroxymethyl)tetrahydropyran-2-yl]oxy-benzoic acid	3.78	359.098	221.6	C15H20O10	NEG	1.87245e+07
Propionic acid	3.78	73.0296	74.3	C3H6O2	NEG	9.12777e+06
p-Hydroxymandelic acid	3.78	167.035	57.7	C8H8O4	NEG	1.36391e+08
8-[(2E)-3,7-dimethylocta-2,6-dienyl]-7-hydroxy-chromen-2-one	3.78	297.152	26.6	C19H22O3	NEG	3.70272e+09
N6,N6,N6-Trimethyllysine	3.78	189.159	546.6	C9H20N2O2	POS	1.16999e+08
Pyrrolidine	3.78	72.08	291.6	C4H9N	POS	1.38533e+07
(1S,4S,13S)-4'-methoxy-3',11-dimethyl-4-[(2S,4S)-4-methyl-5-oxo-tetrahydrofuran-2-yl]spiro[5-azatricyclo[8.3.0.01,5]tridec-10-ene-13,5'-furan]-2',12-dione	3.78	416.206	47.6	C23H29NO6	POS	5.64663e+07
Fomepizole	3.78	83.0601	17.3	C4H6N2	POS	4.59178e+06
Undecenedioylcarnitine (Car(11:1-O2))	3.78	358.222	333.8	C18H31NO6	POS	2.13783e+06
Trigonelline	3.78	136.04	311.3	C7H7NO2	NEG	2.30315e+07
Phe-Leu	3.78	277.156	207.2	C15H22N2O3	NEG	2.95541e+07
Leucylphenylalanine	3.78	277.156	207.2	C15H22N2O3	NEG	2.95541e+07
Purine	3.78	119.035	108.2	C5H4N4	NEG	6.95397e+06
(E)-5-[(1R,3S,4aS,5S,8aS)-3-hydroxy-1,4a,5-trimethyl-2-methylidene-4,5,6,7,8,8a-hexahydro-3H-naphthalen-1-yl]-3-methylpent-2-enoic acid	3.77	319.228	458.8	C20H32O3	NEG	1.46215e+07
(1aS,3aS,6aS,6bR)-2-formyl-5,5,6b-trimethyl-3a,4,6,6a-tetrahydro-1H-cyclopropa[e]indene-1a-carboxylic acid	3.77	247.134	423.6	C15H20O3	NEG	2.11314e+07
Tetrabenazine	3.77	318.206	359.5	C19H27NO3	POS	6.97038e+07
(2S,3S,4S,5R,6R)-6-[[(3S,6aR,6bS,8aS,14bR)-8a-carboxy-4-(hydroxymethyl)-4,6a,6b,11,11,14b-hexamethyl-1,2,3,4a,5,6,7,8,9,10,12,12a,14,14a-tetradecahydropicen-3-yl]oxy]-3,4,5-trihydroxy-tetrahydropyran-2-carboxylic acid	3.77	647.381	437.8	C36H56O10	NEG	826887
1-Methyl-6-phenyl-1H-imidazo[4,5-b]pyridin-2-amine	3.77	223.098	385.1	C13H12N4	NEG	2.74776e+08
(2R)-6-Oxo-2-piperidinecarboxylic acid	3.77	142.051	102.1	C6H9NO3	NEG	1.02811e+06
3,4-Dihydroxymandelic acid	3.77	165.019	73.6	C8H8O5	NEG	3.76238e+06
7-hydroxy-3-(4-hydroxyphenyl)-5-methoxy-chromen-4-one	3.77	285.075	62.3	C16H12O5	POS	1.9721e+07
(1S,3R,17S,19S)-3-hydroxy-9,9,16,16-tetramethyl-8-oxa-14,23,25-triazaheptacyclo[17.5.2.01,17.03,15.04,13.07,12.019,23]hexacosa-4(13),5,7(12),10,14-pentaene-24,26-dione	3.77	448.22	29.7	C26H29N3O4	POS	1.0842e+06
Pivagabine	3.77	186.113	227.6	C9H17NO3	NEG	1.19302e+07
Bergaptol	3.77	201.02	19.3	C11H6O4	NEG	249904
Okanin	3.76	287.057	337.2	C15H12O6	NEG	3.48197e+07
Prunin	3.76	433.114	324.9	C21H22O10	NEG	1.13057e+08
PC(35:3)	3.76	770.567	637.8	C43H80NO8P	POS	1.24609e+06
(2S)-2-benzamido-3-phenyl-propanoic acid	3.76	252.102	381.7	C16H15NO3	POS	6.00729e+06
(3aR,5S,5aS,9aR)-5,8-dimethyl-1-methylene-4,5,5a,6,9,9a-hexahydro-3aH-azuleno[6,5-b]furan-2,7-dione	3.76	247.132	292.7	C15H18O3	POS	2.22353e+07
3-methoxy-1-methyl-quinolin-4-one	3.76	190.086	212.7	C11H11NO2	POS	5.79776e+07
Ecabet (sodium)	3.76	379.157	399	C20H28O5S	NEG	1.25035e+08
3-O-Acetylpinobanksin	3.76	313.072	381.6	C17H14O6	NEG	1.88175e+07
Sulochrin	3.76	331.083	332.6	C17H16O7	NEG	3.69511e+07
[(2S,3R,4S,5S,6R)-2-[[(3S,4R,4aS)-8-oxo-4-vinyl-4,4a,5,6-tetrahydro-3H-pyrano[3,4-c]pyran-3-yl]oxy]-4,5-dihydroxy-6-(hydroxymethyl)tetrahydropyran-3-yl] 3-hydroxybenzoate	3.76	477.14	305.9	C23H26O11	NEG	3.03522e+07
6-hydroxy-6-(3-hydroxy-2,3-dimethyl-cyclopentyl)-2-methyl-heptanoic acid	3.76	271.192	295	C15H28O4	NEG	3.20303e+07
2-Hydroxy-4-methoxybenzoic acid	3.76	167.035	57.7	C8H8O4	NEG	1.36391e+08
Tarasaponin VI	3.76	763.427	264.1	C41H64O13	NEG	3.65791e+06
(2Z)-6-hydroxy-2-[(4-hydroxy-3-methoxy-phenyl)methylene]benzofuran-3-one	3.76	285.075	62.3	C16H12O5	POS	1.9721e+07
Triamterene	3.76	254.117	97.4	C12H11N7	POS	3.45203e+07
(1S,19R)-8,10-dioxa-4,17-diazaheptacyclo[15.4.3.01,18.04,19.05,13.07,11.014,19]tetracosa-5,7(11),12,22-tetraen-3-one	3.76	337.154	54.3	C20H20N2O3	POS	1.62741e+08
Fraxinol	3.76	223.063	28.9	C11H10O5	POS	1.0822e+06
Eurycomalactone	3.76	347.15	58.7	C19H24O6	NEG	7.34002e+06
5-Hydroxy-7,8-dimethoxyflavone,Moslosooflavone	3.75	299.091	448.4	C17H14O5	POS	2.88466e+07
5,7-dihydroxy-2-[4-[3,4,5-trihydroxy-6-(hydroxymethyl)tetrahydropyran-2-yl]oxyphenyl]chroman-4-one	3.75	433.114	324.9	C21H22O10	NEG	1.13057e+08
3',4,4,7a-tetramethyl-3-oxo-3'-vinyl-spiro[3a,5,6,7-tetrahydroisobenzofuran-1,6'-cyclohexene]-1'-carboxylic acid	3.75	315.195	430.3	C20H28O4	POS	1.34321e+08
5-[2-(3-furyl)ethyl]-8-hydroxy-5,6,8a-trimethyl-3,4,4a,6,7,8-hexahydronaphthalene-1-carboxylic acid	3.75	331.192	470.3	C20H28O4	NEG	2.14347e+07
(9a-methoxy-3,5,8a-trimethyl-2,7-dioxo-4,4a,8,9-tetrahydrobenzo[f][1]benzofuran-8-yl) acetate	3.75	333.135	302.8	C18H22O6	NEG	2.2639e+07
N-Methylflindersine	3.75	242.117	52.3	C15H15NO2	POS	1.71995e+08
Norepinephrine	3.75	152.07	195.7	C8H11NO3	POS	1.55129e+06
Denticetic-acid	3.75	179.144	70.5	C12H22O2	NEG	4.31814e+07
3-Methyluridine	3.74	257.078	105.1	C10H14N2O6	NEG	1.71622e+07
Homogentisic acid	3.74	149.024	212.8	C8H8O4	NEG	1.6484e+07
1,11-dihydroxy-1,2,6a,6b,9,9,12a-heptamethyl-10-oxo-3,4,5,6,6a,7,8,8a,11,12,13,14b-dodecahydro-2H-picene-4a-carboxylic acid	3.74	485.328	482.7	C30H46O5	NEG	2.55889e+07
Isoliquiritigenin	3.74	255.066	337.9	C15H12O4	NEG	3.10667e+07
(Z)-3-(4-hydroxyphenyl)-N-[4-[[(Z)-3-(4-hydroxyphenyl)prop-2-enoyl]amino]butyl]prop-2-enamide	3.74	381.18	323.2	C22H24N2O4	POS	9.49246e+07
(Z)-2-hydroxyoctadec-9-enoic acid	3.74	297.244	520	C18H34O3	NEG	2.36337e+08
methyl 2-hydroxy-3-[(2S,3R,4S,5S,6R)-3,4,5-trihydroxy-6-(hydroxymethyl)tetrahydropyran-2-yl]oxy-benzoate	3.74	329.088	200.6	C14H18O9	NEG	1.00849e+07
(1R,4S,8R,9R,12S,13S,16S,19R)-9,19-dihydroxy-7,7-dimethyl-17-methylene-3,10-dioxapentacyclo[14.2.1.01,13.04,12.08,12]nonadecane-2,18-dione	3.74	361.166	307.5	C20H26O6	NEG	9.64434e+09
(10S,11R)-10,11-dihydroxy-9-(hydroxymethyl)-1,6a,6b,9,12a-pentamethyl-2-methylidene-1,3,4,5,6,6a,7,8,8a,10,11,12,13,14b-tetradecahydropicene-4a-carboxylic acid	3.74	485.327	410.8	C30H46O5	NEG	3.39762e+06
5-(2-hydroxy-4-methylphenyl)-6-methylheptan-2-one	3.74	235.169	412.5	C15H22O2	POS	1.03804e+08
6-[2-(1,3-benzodioxol-5-yl)ethyl]-4-methoxy-pyran-2-one	3.74	257.081	404.5	C15H14O5	POS	1.91297e+08
(6S,7aR)-6-hydroxy-4,4,7a-trimethyl-6,7-dihydro-5H-benzofuran-2-one	3.74	179.106	266.3	C11H16O3	POS	2.55422e+08
Diacetyl	3.74	87.0439	141.1	C4H6O2	POS	2.57544e+07
1,9b-dihydroxy-6,6,9a-trimethyl-1,5,5a,7,8,9-hexahydrobenzo[e]isobenzofuran-3-one	3.74	265.145	420.9	C15H22O4	NEG	1.277e+08
[(2S,3R,4S,5S,6R)-3,4,5-trihydroxy-6-(hydroxymethyl)tetrahydropyran-2-yl] (2E,6E)-8-hydroxy-2,6-dimethyl-octa-2,6-dienoate	3.74	345.156	329.5	C16H26O8	NEG	3.44644e+08
4(3H)-Quinazolinone	3.74	145.041	294	C8H6N2O	NEG	541206
(2R,3S,4S,5R,6R)-2-(hydroxymethyl)-6-[(3-hydroxy-2,6,6-trimethyl-cyclohexen-1-yl)methoxy]tetrahydropyran-3,4,5-triol	3.74	331.176	293.8	C16H28O7	NEG	1.92686e+07
(2R,3R,4S,5S,6R)-2-[(2E,6R)-6-hydroxy-2,6-dimethyl-octa-2,7-dienoxy]-6-(hydroxymethyl)tetrahydropyran-3,4,5-triol	3.74	331.176	293.8	C16H28O7	NEG	1.92686e+07
Indole-3-pyruvic acid	3.74	202.051	277.1	C11H9NO3	NEG	5.93011e+06
3-Hydroxyhippuric acid	3.74	194.046	175.6	C9H9NO4	NEG	3.64586e+06
4-Ethoxybenzoic acid	3.74	165.055	64.6	C9H10O3	NEG	1.26858e+09
Sulfaquinoxaline (sodium salt)	3.74	299.057	36.7	C14H12N4O2S	NEG	2.93627e+08
Gelsemine	3.74	323.175	81.3	C20H22N2O2	POS	1.42476e+08
Epicatechin	3.74	273.075	25	C15H14O6	POS	50952.9
(-)-Catechin	3.74	273.075	25	C15H14O6	POS	50952.9
Ligustrazine	3.74	137.107	10.2	C8H12N2	POS	5.20455e+06
12,14-dihydroxy-11-methyl-6-methylene-16-oxo-15-oxapentacyclo[9.3.2.15,8.01,10.02,8]heptadecane-9-carboxylic acid	3.74	329.139	215.4	C19H24O6	NEG	1.57776e+06
Gabapentin	3.74	152.108	196.6	C9H17NO2	NEG	323039
Diabeton	3.74	152.035	79.6	C7H7NO3	NEG	2.68865e+07
Butin	3.74	271.061	76.4	C15H12O5	NEG	5.13762e+07
Butein	3.74	271.061	76.4	C15H12O5	NEG	5.13762e+07
(3aS,5aS,5bR,9S,11aR,13aR)-9-hydroxy-1-isopropenyl-5b,8,8,11a-tetramethyl-1,2,3,4,5,6,7,7a,9,10,11,11b,12,13,13a,13b-hexadecahydrocyclopenta[a]chrysene-3a,5a-dicarboxylic acid	3.73	485.328	482.7	C30H46O5	NEG	2.55889e+07
3-Hydroxyvaleric acid	3.73	99.0452	164.5	C5H10O3	NEG	1.11723e+07
(Z)-5,8,11-trihydroxyoctadec-9-enoic acid	3.73	329.234	406.8	C18H34O5	NEG	4.77704e+08
7,8-dihydroxy-4-phenyl-chromen-2-one	3.73	255.065	409.4	C15H10O4	POS	1.18907e+09
14-hydroxy-14-(hydroxymethyl)-5,9-dimethyl-tetracyclo[11.2.1.01,10.04,9]hexadecane-5-carboxylic acid	3.73	335.223	446.7	C20H32O4	NEG	4.08323e+07
4-[2-[(1R,4aS,5R,8aS)-6-hydroxy-5-(hydroxymethyl)-5,8a-dimethyl-2-methylene-decalin-1-yl]ethyl]-2H-furan-5-one	3.73	333.207	408.3	C20H30O4	NEG	3.88632e+07
1-[2,4-dihydroxy-6-[(2S,3R,4S,5S,6R)-3,4,5-trihydroxy-6-(hydroxymethyl)tetrahydropyran-2-yl]oxy-phenyl]ethanone	3.73	329.088	200.6	C14H18O9	NEG	1.00849e+07
5-hydroxy-2-(4-hydroxyphenyl)-7-[(2S,3R,4S,5S,6R)-3,4,5-trihydroxy-6-(hydroxymethyl)tetrahydropyran-2-yl]oxy-chroman-4-one	3.73	433.114	324.9	C21H22O10	NEG	1.13057e+08
(2S,4aS,6aS,6bR,10S,12aS,14bS)-10-hydroxy-2,4a,6a,6b,9,9,12a-heptamethyl-13-oxo-3,4,5,6,6a,7,8,8a,10,11,12,14b-dodecahydro-1H-picene-2-carboxylic acid	3.73	469.334	520	C30H46O4	NEG	1.18672e+07
1,4-dihydroxy-6,6,9a-trimethyl-4,5,5a,7,8,9-hexahydro-1H-benzo[e]isobenzofuran-3-one	3.73	265.145	420.9	C15H22O4	NEG	1.277e+08
Duroquinone	3.73	165.091	438.5	C10H12O2	POS	8.26298e+06
5,7,11,19-tetraoxapentacyclo[10.8.0.02,10.04,8.013,18]icosa-2,4(8),9,13(18),14,16-hexaen-16-ol	3.73	285.075	409.1	C16H12O5	POS	5.04122e+08
(3aS)-2-[(3S)-quinuclidin-3-yl]-3a,4,5,6-tetrahydro-3H-benzo[de]isoquinolin-1-one	3.73	297.196	309.4	C19H24N2O	POS	1.39759e+08
Diaveridine	3.73	243.122	228.1	C13H16N4O2	POS	3.25078e+07
Pyridoxine	3.73	170.081	56.2	C8H11NO3	POS	8.06127e+06
1-(2,6-dihydroxyphenyl)-9-phenyl-nonan-1-one	3.73	325.184	568.5	C21H26O3	NEG	1.90963e+08
methyl (E)-8-(4-hydroxy-6-methoxy-7-methyl-3-oxo-1H-2-benzofuran-5-yl)-2,6-dimethyloct-6-enoate	3.73	375.185	461	C21H28O6	NEG	3.49355e+07
beta-Estradiol	3.73	271.171	445.7	C18H24O2	NEG	995898
3-hydroxy-4-phenyl-1H-quinolin-2-one	3.73	236.072	427.4	C15H11NO2	NEG	248393
[6-[cyano(phenyl)methoxy]-3,4,5-trihydroxyoxan-2-yl]methyl benzoate	3.73	380.114	404	C21H21NO7	NEG	5.18574e+07
1,3,5,6-tetrahydroxy-2-methyl-anthracene-9,10-dione	3.73	285.041	370.1	C15H10O6	NEG	6.82531e+09
(2S,3S,4aS)-2,3,7-trihydroxy-9-methoxy-4a-methyl-3,4-dihydro-2H-benzo[c]chromen-6-one	3.73	291.088	358	C15H16O6	NEG	4.35657e+07
4-(3,4-dihydroxyphenyl)-7-hydroxy-5-[(2S,3R,4S,5S,6R)-3,4,5-trihydroxy-6-(hydroxymethyl)tetrahydropyran-2-yl]oxy-chromen-2-one	3.73	447.094	312.9	C21H20O11	NEG	1.14464e+08
2-Methoxycinnamic acid	3.73	177.056	302.5	C10H10O3	NEG	2.66311e+07
2-(1,5,8-trihydroxy-4a,8-dimethyl-1,2,3,4,5,6,7,8a-octahydronaphthalen-2-yl)prop-2-enoic acid	3.73	283.155	279.8	C15H24O5	NEG	7.49185e+08
3-(2,3-dihydroxypropyl)-6,8-dihydroxy-isochromen-1-one	3.73	251.056	240.7	C12H12O6	NEG	4.38463e+07
2-Hydroxyisobutyric acid	3.73	85.0296	116.6	C4H8O3	NEG	4.47224e+06
2-Hydroxybutyric acid	3.73	85.0296	116.6	C4H8O3	NEG	4.47224e+06
beta-Alanine	3.73	88.0403	338.9	C3H7NO2	NEG	1.88416e+06
Dropropizine	3.73	237.159	72	C13H20N2O2	POS	1.54335e+07
Malic acid	3.73	133.014	450.6	C4H6O5	NEG	1.19988e+06
(1R,4aS,6aS,6bR,10S,12aR,14bS)-10-[(2S,3R,4S,5S)-4,5-dihydroxy-3-[(2S,3R,4S,5S,6R)-3,4,5-trihydroxy-6-(hydroxymethyl)oxan-2-yl]oxyoxan-2-yl]oxy-1-hydroxy-1,2,6a,6b,9,9,12a-heptamethyl-2,3,4,5,6,6a,7,8,8a,10,11,12,13,14b-tetradecahydropicene-4a-carboxylic acid	3.73	765.442	269.5	C41H66O13	NEG	3.28496e+07
Tetradecanedioic acid	3.73	257.176	243.4	C14H26O4	NEG	6.02401e+07
(E)-3-(3,4-dihydroxyphenyl)-N-[2-(4-hydroxyphenyl)ethyl]prop-2-enamide	3.73	298.108	84.4	C17H17NO4	NEG	5.23627e+07
(1S,5R,8S,9S)-7,9-dihydroxy-2,5,9-trimethyltricyclo[6.3.0.01,5]undec-2-ene-3-carboxylic acid	3.73	265.145	80.9	C15H22O4	NEG	2.19362e+07
2,4,8,9-tetrahydroxybenzofuro[3,2-c]chromen-6-one	3.73	299.02	59	C15H8O7	NEG	6.35701e+08
Cynarin	3.72	499.123	296.4	C25H24O12	POS	2.45645e+06
8-[4,5-dihydroxy-6-(hydroxymethyl)-3-[3,4,5-trihydroxy-6-(hydroxymethyl)tetrahydropyran-2-yl]oxy-tetrahydropyran-2-yl]-5,7-dihydroxy-2-(4-hydroxyphenyl)chromen-4-one	3.72	595.165	306.6	C27H30O15	POS	5.27233e+08
2-(3,4-dihydroxyphenyl)-7-hydroxy-5-[(2S,3R,4S,5S,6R)-3,4,5-trihydroxy-6-[[(2R,3R,4R,5R,6S)-3,4,5-trihydroxy-6-methyl-tetrahydropyran-2-yl]oxymethyl]tetrahydropyran-2-yl]oxy-chromen-4-one	3.72	595.165	306.6	C27H30O15	POS	5.27233e+08
3,5-dihydroxy-7-methoxy-2-(4-methoxyphenyl)chromen-4-one	3.72	315.086	401.9	C17H14O6	POS	4.20748e+07
1,3-dihydroxy-6-(hydroxymethyl)-8-methoxy-anthracene-9,10-dione	3.72	301.07	375.3	C16H12O6	POS	1.43679e+08
6-hydroxy-2-(2-hydroxyphenyl)chromen-4-one	3.72	255.065	409.4	C15H10O4	POS	1.18907e+09
Corosolic acid	3.72	471.349	532.7	C30H48O4	NEG	4.90067e+06
(1S,2R,4aS,6aS,6bR,10S,11R,12aR,14bS)-10,11-dihydroxy-1,2,6a,6b,9,9,12a-heptamethyl-2,3,4,5,6,6a,7,8,8a,10,11,12,13,14b-tetradecahydro-1H-picene-4a-carboxylic acid	3.72	471.349	532.7	C30H48O4	NEG	4.90067e+06
(1S,2R,4aS,6aS,6bR,10R,11R,12aR,14bS)-10,11-dihydroxy-1,2,6a,6b,9,9,12a-heptamethyl-2,3,4,5,6,6a,7,8,8a,10,11,12,13,14b-tetradecahydro-1H-picene-4a-carboxylic acid	3.72	471.349	532.7	C30H48O4	NEG	4.90067e+06
(4aR,5S)-9,9a-dihydroxy-3,4a,5-trimethyl-5,6,7,8,8a,9-hexahydro-4H-benzo[f]benzofuran-2-one	3.72	265.145	420.9	C15H22O4	NEG	1.277e+08
7,3',4'-Trihydroxyflavone	3.72	269.046	369	C15H10O5	NEG	2.67008e+08
Mefenamic acid	3.72	224.107	423.5	C15H15NO2	POS	3.21569e+07
Ligustilide	3.72	191.106	391.9	C12H14O2	POS	3.28986e+07
N-[(4-hydroxy-3-methoxy-phenyl)methyl]octanamide	3.72	280.19	350.6	C16H25NO3	POS	8.22544e+06
PD98059	3.72	268.096	324.8	C16H13NO3	POS	2.43499e+07
N-Benzyloxycarbonylglycine	3.72	192.065	269.4	C10H11NO4	POS	9.35539e+07
3-(1-carboxyvinyloxy)benzoic acid	3.72	209.044	231.8	C10H8O5	POS	2.8867e+07
7-hydroxy-3-(hydroxymethyl)-5-methyl-isochromen-1-one	3.72	207.065	223.5	C11H10O4	POS	4.87002e+07
Antipyrine (Phenazone)	3.72	189.102	209.9	C11H12N2O	POS	5.56528e+07
3-Hydroxyanthranilic acid	3.72	136.039	141.9	C7H7NO3	POS	6.62284e+07
5-Hydroxymethylfurfural	3.72	127.039	99.5	C6H6O3	POS	3.10723e+07
N-Acetylcadaverine	3.72	145.133	52.2	C7H16N2O	POS	5.35055e+06
Sophocarpine	3.72	247.18	45.3	C15H22N2O	POS	5.14214e+06
Ginkgolic acid C15:0	3.72	347.261	611.2	C22H36O3	NEG	3.62675e+06
3,3,5-trimethyl-11H-pyrano[3,2-a]carbazole	3.72	262.124	443.9	C18H17NO	NEG	911454
Medicagenic acid	3.72	501.323	413.6	C30H46O6	NEG	2.05157e+06
Homovanillic acid	3.72	181.05	172.2	C9H10O4	NEG	9.41369e+07
L-Hyoscyamin	3.72	290.175	213.8	C17H23NO3	POS	1.56411e+07
5,6-Dihydroxytetradecanedioic acid	3.72	289.165	357.7	C14H26O6	NEG	1.74191e+06
3-Hydroxypropionic acid (beta-lactic acid)	3.72	89.0243	293.2	C3H6O3	NEG	1.35467e+07
Propionylcarnitine (Car(3:0))	3.72	216.124	261.9	C10H19NO4	NEG	1.65874e+06
2'-Deoxyuridine	3.72	227.067	78.5	C9H12N2O5	NEG	3.94823e+07
[(7R,8R,10R,13S,17R)-17-(3-furyl)-4,4,8,10,13-pentamethyl-3,16-dioxo-6,7,9,11,12,17-hexahydro-5H-cyclopenta[a]phenanthren-7-yl] acetate	3.72	449.229	37.4	C28H34O5	NEG	2.44107e+07
Allopurinol	3.71	137.046	50.7	C5H4N4O	POS	4.26705e+06
3-IsopropoxybenzoicAcid	3.71	179.071	404.9	C10H12O3	NEG	2.23094e+07
3-isopropyl-4-methyl-2,3-dihydropyrrolo[3,4-b]quinoline-1,9-dione	3.71	257.128	308	C15H16N2O2	POS	7.86843e+07
Axillarin	3.71	347.076	294	C17H14O8	POS	1.07333e+08
[(6aR,9R)-7-methyl-6,6a,8,9-tetrahydro-4H-indolo[4,3-fg]quinolin-9-yl]methanol	3.71	255.149	250	C16H18N2O	POS	1.64817e+07
Melatonin	3.71	233.128	248	C13H16N2O2	POS	6.64376e+08
(1R,9S)-11-acetyl-7,11-diazatricyclo[7.3.1.02,7]trideca-2,4-dien-6-one	3.71	233.128	248	C13H16N2O2	POS	6.64376e+08
Racanisodamine	3.71	306.17	241.7	C17H23NO4	POS	4.53281e+07
3-Aminosalicylic acid	3.71	136.039	109.9	C7H7NO3	POS	3.05547e+06
Methionine sulfone	3.71	164.037	59.5	C5H11NO4S	POS	1.00123e+08
3-[(1S,2S,4aS,7S,8aR)-4,7-dimethyl-1-[(E)-prop-1-enyl]-1,2,4a,5,6,7,8,8a-octahydronaphthalene-2-carbonyl]-4-hydroxy-5-(4-hydroxyphenyl)-1H-pyridin-2-one	3.71	432.219	456.7	C27H31NO4	NEG	2.37332e+07
(E)-2-(4-Methylpent-3-enyl)-6-oxohept-2-enoic acid	3.71	223.134	423.1	C13H20O3	NEG	2.55777e+07
(Z)-2-(4-Methylpent-3-enyl)-6-oxohept-2-enoic acid	3.71	223.134	423.1	C13H20O3	NEG	2.55777e+07
1-(4-hydroxy-2-methoxy-phenyl)-3-(4-hydroxyphenyl)prop-2-en-1-one	3.71	269.082	399.4	C16H14O4	NEG	2.53854e+08
(3S,4S)-3,4-bis(1,3-benzodioxol-5-ylmethyl)-3-hydroxy-tetrahydrofuran-2-one	3.71	369.098	362.6	C20H18O7	NEG	1.93854e+07
(2R,3S,4S,5R,6R)-2-(hydroxymethyl)-6-[(5-hydroxy-4,7,7-trimethyl-2-bicyclo[2.2.1]heptanyl)oxy]oxane-3,4,5-triol	3.71	331.177	312.2	C16H28O7	NEG	8.69157e+06
Daphnetin	3.71	177.019	255.9	C9H6O4	NEG	2.7794e+09
2-Methylbutyrylglycine	3.71	158.082	255.4	C7H13NO3	NEG	9.61861e+07
(9a-methyl-2',3-dioxo-spiro[4,5,5a,7,8,9-hexahydro-1H-benzo[e]isobenzofuran-6,3'-oxetane]-5-yl) acetate	3.71	319.119	235.6	C17H20O6	NEG	1.20987e+08
methyl (2S)-2-acetamido-3-phenyl-propanoate	3.71	222.112	51.3	C12H15NO3	POS	8.11948e+07
Hypaconine	3.71	470.274	347.1	C24H39NO8	POS	267193
Quinine	3.71	325.19	172	C20H24O2N2	POS	5.13838e+07
(+)-Quinidine	3.71	325.19	172	C20H24N2O2	POS	5.13838e+07
(6-methoxy-4-quinolyl)-[(2R,4S,5R)-5-vinylquinuclidin-2-yl]methanol	3.71	325.19	172	C20H24N2O2	POS	5.13838e+07
Strychnine	3.71	335.175	157.7	C21H22N2O2	POS	3.88647e+07
Naratriptan (hydrochloride)	3.71	336.174	125.1	C17H25N3O2S	POS	3.69468e+08
Yohimbine	3.71	355.201	61.6	C21H26N2O3	POS	6.93301e+07
2-Furoylglycine	3.71	168.03	247.6	C7H7NO4	NEG	1.31589e+06
1-hydroxy-1-(hydroxymethyl)-8,8-dimethyl-2-oxo-4a,6a,7,9-tetrahydro-4H-pentaleno[1,6a-c]pyran-5-carboxylic acid	3.71	295.119	207.7	C15H20O6	NEG	2.48908e+07
Pro-Phe	3.71	261.124	206.4	C14H18N2O3	NEG	1.06211e+07
Mevalonic acid	3.71	129.056	185.2	C6H12O4	NEG	1.2741e+07
4-ethoxychromen-2-one	3.71	189.055	63.4	C11H10O3	NEG	8.68757e+07
2-(3,4-dihydroxyphenyl)-5,7-dihydroxy-6,8-dimethoxy-chromen-4-one	3.7	347.076	294	C17H14O8	POS	1.07333e+08
2-(hydroxymethyl)-6-[[(1S,4R)-1,3,3-trimethyl-2-oxabicyclo[2.2.2]octan-6-yl]oxy]tetrahydropyran-3,4,5-triol	3.7	331.177	312.2	C16H28O7	NEG	8.69157e+06
methyl (E)-2-[(2S,3R,12bR)-3-vinyl-1,2,3,4,6,7,12,12b-octahydroindolo[2,3-a]quinolizin-2-yl]-3-methoxy-prop-2-enoate	3.7	367.201	338	C22H26N2O3	POS	1.85787e+07
Hexanoylcarnitine (Car(6:0))	3.7	242.175	313.6	C13H25NO4	POS	5.71574e+06
(R)-[(2S,4S,5R)-5-ethylquinuclidin-2-yl]-(6-methoxy-4-quinolyl)methanol	3.7	327.206	309.5	C20H26N2O2	POS	9.25566e+07
(S)-[(2R,4S,5R)-5-ethylquinuclidin-2-yl]-(6-methoxy-4-quinolyl)methanol	3.7	327.206	309.5	C20H26N2O2	POS	9.25566e+07
m-Tyramine (hydrobromide)	3.7	120.08	121.5	C8H11NO	POS	2.10528e+06
Imidazol-1-yl-acetic acid	3.7	127.05	106.9	C5H6N2O2	POS	3.02213e+07
Thymine	3.7	127.05	106.9	C5H6N2O2	POS	3.02213e+07
methyl 3-aminopropanoate	3.7	86.0599	84.1	C4H9NO2	POS	1.69613e+07
5-[(E)-4-carboxy-3-methyl-but-3-enyl]-3-hydroxy-1,4a-dimethyl-6-methylene-decalin-1-carboxylic acid	3.7	349.202	430.7	C20H30O5	NEG	4.65848e+08
(9a-hydroxy-3,8a-dimethyl-5-methylene-2-oxo-4,4a,6,7,8,9-hexahydrobenzo[f]benzofuran-6-yl) acetate	3.7	287.129	315	C17H22O5	NEG	1.73789e+08
4-Aminobenzoic acid	3.7	136.041	144.3	C7H7NO2	NEG	1.79481e+07
Inosine	3.7	267.073	47.5	C10H12N4O5	NEG	4.45049e+06
Prolylalanine	3.7	169.097	385.5	C8H14N2O3	POS	2.14269e+06
MeAIB	3.7	100.075	279.1	C5H11NO2	POS	3.31114e+06
5,7-dihydroxy-2-[4-hydroxy-3-[(2S,3R,4S,5S,6R)-3,4,5-trihydroxy-6-(hydroxymethyl)tetrahydropyran-2-yl]oxy-phenyl]-3-methoxy-chromen-4-one	3.7	479.117	243.9	C22H22O12	POS	2.27954e+07
Pantothenol	3.7	186.113	100.8	C9H19NO4	NEG	9.81052e+06
3-(2,6-dimethoxyphenyl)-1-(4-hydroxyphenyl)propan-1-one	3.7	285.116	21.5	C17H18O4	NEG	2.10153e+08
(3aR,5aR,9bR)-3a-hydroxy-5a,9-dimethyl-3-methylene-4,5,6,7,8,9b-hexahydrobenzo[g]benzofuran-2-one	3.69	247.134	423.6	C15H20O3	NEG	2.11314e+07
methyl (1S,15S,17S,18S)-17-ethyl-14-oxo-3,13-diazapentacyclo[13.3.1.02,10.04,9.013,18]nonadeca-2(10),4,6,8-tetraene-1-carboxylate	3.69	353.185	372.8	C21H24N2O3	POS	3.04219e+07
Androstendione	3.69	287.2	340.5	C19H26O2	POS	2.04975e+07
2-Methoxybenzoic-acid	3.69	153.054	287.6	C8H8O3	POS	1.614e+08
Sinomenine N-oxide	3.69	346.164	246.6	C19H23NO5	POS	1.05894e+09
1,7-diazatricyclo[7.3.0.03,7]dodecane-2,8-dione	3.69	195.112	229.3	C10H14N2O2	POS	2.09304e+07
Syringaldehyde	3.69	183.065	221.6	C9H10O4	POS	3.01905e+08
Epinephrine	3.69	166.086	77.7	C9H13NO3	POS	2.00952e+06
8,8-dimethyl-2-phenyl-pyrano[2,3-f]chromen-4-one	3.69	303.106	477.1	C20H16O3	NEG	1.29839e+07
DPCPX	3.69	303.182	388.7	C16H24N4O2	NEG	2.62239e+07
3-Pyridylacetic acid	3.69	136.04	311.3	C7H7NO2	NEG	2.30315e+07
2'-Aminoacetophenone	3.69	136.075	54.4	C8H9NO	POS	1.65263e+07
N-[(7S)-1,2,3,10-tetramethoxy-9-oxo-6,7-dihydro-5H-benzo[a]heptalen-7-yl]acetamide	3.69	400.175	90.8	C22H25NO6	POS	1.71168e+07
Mannose	3.69	161.045	267.8	C6H12O6	NEG	3.96262e+08
Piperonylic acid	3.69	165.019	137.6	C8H6O4	NEG	1.97242e+08
(E)-7-(4-hydroxyphenyl)-1-phenyl-hept-4-en-3-one	3.69	279.137	51.8	C19H20O2	NEG	6.45582e+07
(E)-3-(2,5-dihydroxyphenyl)prop-2-enoic acid	3.68	179.035	263.4	C9H8O4	NEG	7.85347e+09
Monomethyl fumarate	3.68	129.019	95.5	C5H6O4	NEG	1.4707e+07
Allopurinol-1-ribonucleoside	3.68	267.073	47.5	C10H12N4O5	NEG	4.45049e+06
Dihydrotachysterol	3.68	399.361	631.2	C28H46O	POS	7.89015e+06
6-[(2S)-2-hydroxy-3-methyl-but-3-enyl]-5,7-dimethoxy-chromen-2-one	3.68	291.122	297.3	C16H18O5	POS	1.01393e+08
(2R,3S,4S,5R,6S)-2-(hydroxymethyl)-6-[4-[(E)-3-hydroxyprop-1-enyl]phenoxy]tetrahydropyran-3,4,5-triol	3.68	311.114	243.9	C15H20O7	NEG	3.30426e+07
2-hydroxy-3,4-bis(hydroxymethyl)benzoic acid	3.68	197.046	207.6	C9H10O5	NEG	9.27567e+06
N1-Methyl-4-pyridone-3-carboxamide	3.68	153.065	109.8	C7H8N2O2	POS	7.59372e+07
Oxybutynin	3.68	358.237	72.2	C22H31NO3	POS	2.48521e+08
13-oxo-7-[3,4,5-trihydroxy-6-(methoxymethyl)tetrahydropyran-2-yl]oxy-tetradecanoic acid	3.68	433.244	318.2	C21H38O9	NEG	185046
(2E,4E)-3,5,7-trimethylocta-2,4-dienedioic acid	3.68	211.097	317.8	C11H16O4	NEG	1.1522e+07
Selisistat	3.68	247.061	29.4	C13H13ClN2O	NEG	2.26836e+07
1-Caffeoylquinic acid	3.67	353.088	216.9	C16H18O9	NEG	2.43144e+07
(3,11-dihydroxy-7,7,11-trimethyl-6,15-dioxatetracyclo[10.2.1.05,14.08,13]pentadeca-1(14),2,4-trien-4-yl)-phenyl-methanone	3.67	379.157	399	C23H24O5	NEG	1.25035e+08
5-(1,2,4a,5-tetramethyl-7-oxo-3,4,8,8a-tetrahydro-2H-naphthalen-1-yl)-3-methyl-pentanoic acid	3.67	303.231	484.4	C20H32O3	POS	9.30778e+07
Methyl dihydrojasmonate	3.67	227.164	404.9	C13H22O3	POS	7.29156e+07
(9a-hydroxy-3,8a-dimethyl-5-methylene-2-oxo-4,4a,6,7,8,9-hexahydrobenzo[f]benzofuran-8-yl) acetate	3.67	289.143	332.9	C17H22O5	POS	1.13932e+07
Neoastilbin	3.67	433.112	329.5	C21H22O11	POS	1.08735e+07
L-tyrosine-methyl-ester	3.67	178.086	148	C10H13NO3	POS	4.36455e+07
FGIN 1-27	3.67	435.278	563.1	C28H37FN2O	NEG	1.92104e+06
6-[(3E,5E,7S)-5,7-dimethyl-2-oxo-nona-3,5-dienyl]-2,4-dihydroxy-3-methyl-benzaldehyde	3.67	315.161	427.4	C19H24O4	NEG	7.48455e+07
5-chloro-2,4-dihydroxy-6-methyl-3-[(2E,4E)-3-methyl-5-(1,2,6-trimethyl-5-oxo-cyclohex-3-en-1-yl)penta-2,4-dienyl]benzaldehyde	3.67	401.151	423.1	C23H27ClO4	NEG	7.50634e+06
(2S,3R,4S,5S,6R)-2-(3,5-dihydroxyphenoxy)-6-(hydroxymethyl)tetrahydropyran-3,4,5-triol	3.67	287.077	122.4	C12H16O8	NEG	1.98514e+06
3-Dehydroquinic acid	3.67	171.03	95.2	C7H10O6	NEG	2.15795e+06
7-hydroxy-6-methoxy-2-methyl-spiro[3,4-dihydroisoquinoline-1,7'-6H-cyclopenta[g][1,3]benzodioxole]-8'-one	3.67	354.133	57.2	C20H19NO5	POS	7.98043e+07
Phenylpyruvic acid	3.67	163.04	131.8	C9H8O3	NEG	1.79878e+08
Colchicine	3.67	400.175	90.8	C22H25NO6	POS	1.71168e+07
2-[(6,7-dimethoxy-1,2,3,4-tetrahydroisoquinolin-1-yl)methyl]-3-ethyl-9,10-dimethoxy-2,3,4,6,7,11b-hexahydro-1H-benzo[a]quinolizine	3.67	481.305	169.7	C29H40N2O4	POS	1.87477e+07
(Z)-3-phenyl-2-[(2S,3R,4S,5S,6R)-3,4,5-trihydroxy-6-(hydroxymethyl)tetrahydropyran-2-yl]oxy-prop-2-enoic acid	3.67	325.093	319.1	C15H18O8	NEG	3.60716e+06
(3R,4S)-6,8-dihydroxy-3,4,5-trimethyl-1-oxo-isochromane-7-carboxylic acid	3.67	265.072	54.8	C13H14O6	NEG	7.82803e+07
(3R,4S)-4,6,8-trihydroxy-7-methoxy-3-methyl-isochroman-1-one	3.67	239.06	29	C11H12O6	NEG	2.13524e+07
Helioscopinolide A	3.66	317.211	438.1	C20H28O3	POS	1.05989e+08
2-[(1R,6R)-6-isopropenyl-3-methyl-cyclohex-2-en-1-yl]-5-propyl-benzene-1,3-diol	3.66	287.2	429.9	C19H26O2	POS	1.10334e+08
Nikethamide	3.66	179.117	284.8	C10H14N2O	POS	1.26955e+07
6a,7,8-trihydroxy-3-methyl-3,4,5,6,7,12a-hexahydro-2H-benzo[a]anthracene-1,12-dione	3.66	311.127	258.3	C19H20O5	POS	2.02653e+07
(6E,10Z,14E)-6,14-dimethyl-3-methylene-2-oxo-3a,4,5,8,9,12,13,15a-octahydrocyclotetradeca[b]furan-10-carboxylic acid	3.66	329.176	459.3	C20H26O4	NEG	2.09537e+07
methyl 2-(2,6-dihydroxy-4-methyl-benzoyl)-3,5-dimethoxy-benzoate	3.66	327.088	334.9	C18H18O7	NEG	1.62633e+07
Nevirapine	3.66	265.108	330.5	C15H14N4O	NEG	4.35565e+07
(2E,5E)-3,5,7-trimethylocta-2,5-dienedioic acid	3.66	211.098	284.2	C11H16O4	NEG	8.41695e+06
(2S,3R,4R,5R,6R)-2-methyl-6-[[(2R,3S,4S,5R,6S)-3,4,5-trihydroxy-6-[2-hydroxy-5-(2-hydroxyethyl)phenoxy]tetrahydropyran-2-yl]methoxy]tetrahydropyran-3,4,5-triol	3.66	461.166	249.1	C20H30O12	NEG	6.77729e+07
2,4-Hexadienoic-acid	3.66	111.045	88.7	C6H8O2	NEG	5.72865e+06
1-(6-methoxy-4-quinolyl)-3-[(3R,4R)-3-vinyl-4-piperidyl]propan-1-one	3.66	325.19	172	C20H24N2O2	POS	5.13838e+07
Nipecotic acid	3.66	130.086	340.7	C6H11NO2	POS	5.65852e+06
Oxooctenoylcarnitine (Car(8:2-O))	3.66	300.18	216.6	C15H25NO5	POS	2.8163e+07
5-Hydroxytryptophan	3.66	219.077	254	C11H12N2O3	NEG	1.43492e+06
[4-[(2S,3R,4S,5S,6R)-3,4,5-trihydroxy-6-(hydroxymethyl)tetrahydropyran-2-yl]oxyphenyl]methyl 3,4-dihydroxybenzoate	3.66	403.103	64.9	C20H22O10	NEG	8.03981e+07
5-ethyl-6-oxo-4-[2-[(2R,3R,4S,5S,6R)-3,4,5-trihydroxy-6-(hydroxymethyl)oxan-2-yl]oxyethyl]-2,3-dihydropyran-3-carboxylic acid	3.65	375.13	247.1	C16H24O10	NEG	1.41661e+07
2,4-Dihydroxybutanoic acid	3.65	119.035	90.6	C4H8O4	NEG	1.27715e+07
4-Vinylphenol	3.65	121.064	334.9	C8H8O	POS	3.68255e+07
Amotosalen (hydrochloride)	3.65	302.138	322.5	C17H19NO4	POS	1.55211e+08
7-ethyl-8-hydroxy-4,7-dimethyl-6-oxo-8H-isochromene-3-carboxylic acid	3.65	265.105	229	C14H16O5	POS	3.88476e+07
4-Methyldaphnetin	3.65	193.049	223.4	C10H8O4	POS	3.26871e+07
(14Z)-9-(1,1-dimethylallyl)-11-hydroxy-14-(1H-imidazol-5-ylmethylene)-2-methoxy-2,13,16-triazatetracyclo[7.7.0.01,13.03,8]hexadeca-3,5,7,10-tetraene-12,15-dione	3.65	432.167	356.2	C23H23N5O4	NEG	5.46283e+06
2-[5-(2-hydroxypropyl)tetrahydrofuran-2-yl]propanoic acid	3.65	183.103	312.3	C10H18O4	NEG	4.28367e+07
methyl (E)-3-(3-hydroxy-4-methoxy-phenyl)prop-2-enoate	3.65	207.066	65.1	C11H12O4	NEG	2.34197e+08
2,4,5-Trimethoxybenzoic acid	3.64	211.061	305.5	C10H12O5	NEG	1.3399e+09
8a-Hydroxy-4a,8-dimethyl-3,4,5,6,7,8-hexahydronaphthalene-2-carboxylic acid	3.64	223.134	423.1	C13H20O3	NEG	2.55777e+07
DL-Norvaline	3.64	100.075	650.7	C5H11NO2	POS	1.60643e+07
6-[[3-(hydroxymethyl)-5-oxo-2H-furan-4-yl]methyl]-5,6-dimethylcyclohexene-1-carboxylic acid	3.64	263.127	311.4	C15H20O5	POS	7.51764e+07
Corydaldine (tautomeric structure 1)	3.64	208.096	296.1	C11H13NO3	POS	2.98535e+09
(E)-1,7-bis(3,4-dihydroxyphenyl)hept-4-en-3-one	3.64	311.127	278.3	C19H20O5	POS	5.9038e+07
Fusaric acid	3.64	180.101	231.2	C10H13NO2	POS	3.28015e+07
1,10a-dihydroxy-4,4,7,11b-tetramethyl-1,2,3,4a,5,6,6a,7,11,11a-decahydronaphtho[2,1-f]benzofuran-9-one	3.64	333.208	480.1	C20H30O4	NEG	1.22592e+07
Usaramine N-oxide	3.64	350.159	223.3	C18H25NO7	POS	1.2301e+07
Tetradecenedioylcarnitine (Car(14:1-O2))	3.64	400.269	322.3	C21H37NO6	POS	4.35907e+06
N-Hydroxypipecolic acid	3.63	128.07	87.5	C6H11NO3	POS	8.10774e+06
Vicenin-1	3.63	563.141	312	C26H28O14	NEG	2.32148e+07
7-Methylxanthine	3.63	165.041	54.4	C6H6N4O2	NEG	3.48428e+07
3-Methylxanthine	3.63	165.041	54.4	C6H6N4O2	NEG	3.48428e+07
5,7-dihydroxy-2-(4-hydroxy-3-methoxy-phenyl)chroman-4-one	3.63	283.064	22.1	C16H14O6	NEG	5.64393e+06
(9S,10R)-10-hydroxy-8,8-dimethyl-9-[(2S,3R,4S,5S,6R)-3,4,5-trihydroxy-6-(hydroxymethyl)tetrahydropyran-2-yl]oxy-9,10-dihydropyrano[2,3-f]chromen-2-one	3.63	423.129	193.7	C20H24O10	NEG	1.76299e+06
(2R)-7-hydroxy-8-(2-hydroxyethyl)-5-methoxy-2-methyl-chroman-4-one	3.63	251.096	27.7	C13H16O5	NEG	3.50994e+07
5,9b-dihydroxy-6,6,9a-trimethyl-5,5a,8,9-tetrahydro-3H-benzo[g]isobenzofuran-1,7-dione	3.62	263.127	311.4	C15H20O5	POS	7.51764e+07
Ajmalicine	3.62	353.185	331.1	C21H24N2O3	POS	1.01666e+07
Biopterin	3.62	220.082	102.5	C9H11N5O3	POS	8.70932e+06
(1R,6R,13R)-13-hydroxy-6-(1-hydroxy-1-methyl-ethyl)-16,17-dimethoxy-2,7,20-trioxapentacyclo[11.8.0.03,11.04,8.014,19]henicosa-3(11),4(8),9,14,16,18-hexaen-12-one	3.62	427.138	375	C23H24O8	NEG	9.77703e+07
Castanospermine	3.62	172.096	328.4	C8H15NO4	POS	472345
Buspirone	3.62	386.253	79.8	C21H31N5O2	POS	6.84335e+06
(4E,7Z)-5,9,9-trimethyl-11-oxabicyclo[8.2.1]trideca-1(13),4,7-triene-6,12-dione	3.61	247.132	264.6	C15H18O3	POS	4.23574e+07
2,2,6,6-Tetramethyl-4-piperidinyl 2-methylacrylate	3.61	226.18	108.7	C13H23NO2	POS	1.22112e+08
Emapunil	3.61	384.18	76.7	C23H23N5O2	POS	1.19077e+07
Ketotifen (fumarate)	3.6	310.128	225.9	C19H19NOS	POS	5.80736e+07
(3aS,5R,7S,7aR)-2,7-diacetyloxy-3-formyl-3a-hydroxy-1,1,3,5-tetramethyl-2,4,5,6,7,7a-hexahydroindene-4-carboxylic acid	3.6	365.164	409.2	C19H28O8	NEG	3.69878e+06
(2E,4E)-N-isobutyl-6-(2-thienyl)hexa-2,4-dienamide	3.59	250.122	407.3	C14H19NOS	POS	2.1426e+07
6-Benzylaminopurine	3.59	208.096	268.5	C12H11N5	POS	7.40927e+07
(S)-10-Hydroxycamptothecin	3.59	363.096	109.4	C20H16N2O5	NEG	6.27057e+06
(±)-10-Hydroxycamptothecin	3.59	363.096	109.4	C20H16N2O5	NEG	6.27057e+06
Gly-Gly-Leu	3.58	244.127	328.7	C10H19N3O4	NEG	5.46331e+07
Ziprasidone	3.58	411.111	21.2	C21H21ClN4OS	NEG	4.48104e+06
FOY 251	3.56	314.115	203.4	C16H15N3O4	POS	1.91773e+06
NG 52	3.55	345.119	62.9	C16H19ClN6O	NEG	5.32721e+06
Donepezil	3.54	362.208	329.8	C24H29NO3	POS	3.99206e+06
[(4E,6E,12E)-3-acetoxytetradeca-4,6,12-trien-8,10-diynyl] acetate	3.53	301.14	474.5	C18H20O4	POS	1.36899e+08
5,2'-O-Dimethyluridine	3.52	271.097	36.3	C11H16N2O6	NEG	3.19425e+07
6,8-dihydroxy-3-[(E)-6-hydroxyhept-1-enyl]isochromen-1-one	3.51	289.112	334.1	C16H18O5	NEG	2.72724e+07
Octaethylene glycol monododecyl ether	3.5	539.409	534.1	C28H58O9	POS	1.31298e+07
4-[1-hydroxy-2-[2-methoxy-4-[(E)-prop-1-enyl]phenoxy]propyl]-2-methoxy-phenol	3.5	325.148	437.8	C20H24O5	NEG	1.22201e+07
1,7,8-trihydroxy-3-methyl-2,3,4,7-tetrahydro-1H-benzo[a]anthracen-12-one	3.49	291.107	57.5	C19H18O4	NEG	3.56381e+06
4,6-dihydroxy-3-(1-hydroxyethyl)-5-methoxy-3H-isobenzofuran-1-one	3.43	239.06	29	C11H12O6	NEG	2.13524e+07
