# Supplementary material
Source: Research Square preprint supplement (doi:10.21203/rs.3.rs-10032042/v1)
Supplement: Supplementary file 2 [file 6b9ee434c006b32308e4d123.xlsx]

## Sheet: Sheet1
Supplementary Table S3. Targeted quantification of phenolic compounds in Berberis honey (BH).
Compound Name	LOD (ng/mL)	LOQ (ng/mL)	STD curve equation	Recovery(%)	RSD(%)	R2	Concentration (μg/100g honey)
Syringic acid	86.96	289.86	y=10965x+751533	97.7	2.2	0.997346	46.9807 ± 4.3035
Kaempferol	0.24	0.8	y=38878x-3046254	103.8	2.4	0.97278	30.3462 ± 2.2690
protocatechuic acid	0.48	1.58	y=19573x+2139041	100.5	3.5	0.997848	29.4643 ± 2.9793
Naringenin chalcone	0.04	0.12	y=60132x+645532	98.2	7.6	0.998248	28.7452 ± 0.4694
Vanillic acid	1.5	4.99	y=6103x+990260	97.0	2.0	0.996042	28.0135 ± 2.5917
Syringaldehyde	1.37	4.58	y=5492x+438424	107.9	5.0	0.984226	23.0313 ± 2.3318
4-Hydroxybenzoic acid	1.97	6.56	y=9830x+3458610	97.4	2.4	0.991917	22.9013 ± 2.1551
Benzoic acid	5.68	18.92	y=7775x+12034806	100.3	4.2	0.991766	21.9079 ± 2.5394
Kaempferol-3-neohesperidoside	0.44	1.47	y=5406x+17606	100.0	5.5	0.998499	21.4704 ± 2.3642
p-Hydroxycinnamic Acid	0.75	2.5	y=9808x788895	97.2	5.5	0.997046	17.5733 ± 1.4717
Nicotiflorin	0.25	0.82	y=9506x-89890	100.7	4.4	0.99925	12.5108 ± 2.1321
Pinocembrin	0.06	0.18	y=120022x+1490587	98.1	2.8	0.998248	10.6772 ± 0.9968
Galangin	0.18	0.61	y=75621x-2385522	102.6	2.7	0.997547	7.0261 ± 0.6634
Isorhamnetin-3-O-neohespeidoside	1.64	5.46	y=5599x-8023	99.6	6.5	0.998899	6.9645 ± 0.7069
Trans-Cinnamic acid	0.7	2.35	y=5670x+134836	98.8	1.2	0.9992	6.4493 ± 0.6046
Quercetin	0.3	1	y=24581x-452041	100.9	1.1	0.99915	5.5433 ± 0.5804
Trans-Ferulic acid	0.57	1.91	y=13587x+518867	98.6	4.9	0.998849	5.3886 ± 0.6886
Robinin	1.54	5.13	y=3908x+15400	99.0	3.9	0.9992	4.9829 ± 0.4114
Chrysin	0.07	0.24	y=137716x+2237936	97.3	3.3	0.997146	4.8644 ± 0.5213
Rutin	0.82	2.74	y=3333x-60653	102.5	2.7	0.997747	3.8837 ± 0.3578
Salicylic acid	40.27	134.23	y=82307x+6697318	95.2	4.4	0.992925	3.6337 ± 0.2784
Sinapic Acid	0.35	1.16	y=6951x+167435	98.0	7.6	0.998599	3.4941 ± 0.4042
Isorhamnetin	0.15	0.5	y=51446x-125327	99.0	2.4	0.99915	3.2201 ± 0.1518
Sakuranetin	0.08	0.26	y=61244x+604659	98.1	1.5	0.998599	2.8642 ± 0.2333
Narcissin	1.21	4.02	y=7613x-64059	100.1	4.4	0.9999	2.5424 ± 0.1078
Cynaroside	0.34	1.14	y=10922x-520455	104.7	1.2	0.993479	1.4947 ± 0.1071
Dihydrokaempferol	0.05	0.18	y=33705x+867966	96.1	1.3	0.995741	1.4312 ± 0.1039
Astilbin	0.55	1.83	y=7731x-118453	102.1	4.8	0.998499	1.1478 ± 0.0800
Isosakuranetin	0.06	0.19	y=84812x+1035785	98.0	3.2	0.998198	1.1281 ± 0.0641
3,7-Di-O-methylquercetin	0.24	0.8	y=32076x-968268	102.3	0.9	0.998148	1.0277 ± 0.0937
Spiraeoside	0.49	1.64	y=5672x-41729	100.3	2.5	0.9995	0.9058 ± 0.0881
Luteolin	0.54	1.79	y=20358x-666840	103.1	0.9	0.997196	0.8942 ± 0.1195
Hesperetin	0.02	0.06	y=42210x+829498	97.3	3.7	0.997046	0.8774 ± 0.0433
Hydrocinnamic acid	0.59	1.96	y=10131x+152462	99.8	4.1	0.9996	0.8370 ± 0.0659
Hyperoside	0.44	1.45	y=7314x-214652	103.1	2.7	0.997397	0.7735 ± 0.0726
Afzelin	0.08	0.26	y=14963x-1801	99.8	8.6	0.99965	0.7720 ± 0.0983
Apigenin	0.21	0.71	y=68351x+1868404	96.5	2.2	0.99559	0.7140 ± 0.0820
Persicogenin	0.14	0.46	y=16886x-16802	99.8	4.9	0.99945	0.6154 ± 0.0628
Diosmetin	0.34	1.13	y=30215x+706272	96.5	3.2	0.996042	0.5256 ± 0.0417
Phthalic Acid	0.26	0.85	y=20647x+1429808	94.0	7.3	0.986712	0.4693 ± 0.0954
Cyanidin-3-O-glucoside chloride	5.03	16.76	y=856.7x-14199	100.4	6.8	0.99965	0.4513 ± 0.0618
Taxifolin	0.07	0.24	y=12971x+127536	97.9	2.2	0.998048	0.3954 ± 0.0400
Gallic acid	0.14	0.48	y=31372x+688963	98.3	1.5	0.997196	0.3680 ± 0.0457
Typhaneoside	0.17	0.58	y=4731x-914.5	100.8	5.2	0.997046	0.3661 ± 0.0448
Astragalin	0.16	0.53	y=22148x+23888	98.9	8.4	0.99955	0.3170 ± 0.0152
Mangiferin	0.22	0.73	y=7716x-162840	101.2	5.6	0.99915	0.3102 ± 0.0487
Baimaside	1.02	3.39	y=2547x-72631	102.8	7.3	0.997898	0.3088 ± 0.0513
Acacetin	0.1	0.33	y=86223x+1849488	96.9	4.4	0.996895	0.2914 ± 0.0019
Kaempferide	0.16	0.54	y=70311x+136396	97.8	1.0	0.998349	0.2893 ± 0.0234
Oroxin B	0.49	1.65	y=4382x-37612	100.0	5.6	0.99975	0.2352 ± 0.0268
Hesperidin	1.85	6.18	y=1496x-2586	99.3	4.7	0.99925	0.2324 ± 0.0384
Naringenin-7-O-glucoside	1.22	4.07	y=5654x+2747	99.0	3.5	0.9992	0.2280 ± 0.0172
pyrocatechol	0.05	0.18	y=192417x+1202682	99.3	0.6	0.9993	0.2066 ± 0.0162
Dihydromyricetin	0.19	0.63	y=4436x-51122	99.9	6.0	0.99915	0.1916 ± 0.0352
Engeletin	0.59	1.97	y=12510x-80351	100.0	5.2	0.9992	0.1879 ± 0.0335
Myricetin	1.44	4.8	y=3878x-202750	105.2	2.6	0.992824	0.1866 ± 0.0138
Quercimeritrin	0.73	2.44	y=4846x-38999	100.9	3.6	0.998148	0.1848 ± 0.0103
Afzelechin	0.51	1.7	y=8410x+47217	98.0	4.1	0.998699	0.1791 ± 0.0165
Eriodictyol	0.08	0.28	y=22626x+139495	98.5	3.0	0.998649	0.1664 ± 0.0149
Genkwanin	0.08	0.25	y=134104x+2250224	96.5	0.7	0.996444	0.1601 ± 0.0149
Kaempferitrin	0.29	0.95	y=8996x+24672	100.6	10.4	0.998699	0.1551 ± 0.0114
Deguelin	0.65	2.16	y=681x-12327	101.6	6.0	0.997597	0.1547 ± 0.0095
Hispidulin	0.22	0.72	y=46696x+621792	97.3	2.3	0.997998	0.1547 ± 0.0071
Quercetin 3-β-D-glucoside	0.22	0.74	y=13796x-278558	103.2	7.7	0.996695	0.1489 ± 0.0228
Isorhamnetin-3-O-glucoside	0.15	0.51	y=12654x-21200	99.3	1.0	0.99945	0.1418 ± 0.0068
Genistin	0.45	1.5	y=3187x+7829	98.5	7.0	0.998799	0.1188 ± 0.0295
Pedalitin	1.49	4.98	y=6694x-162853	100.1	5.7	0.998599	0.1098 ± 0.0111
3,4'-Dihydroxyflavone	0.79	2.62	y=12452x-927212	109.9	3.2	0.976678	0.1029 ± 0.0058
Liquiritigenin	0.15	0.49	y=40737x+952124	96.7	4.7	0.996444	0.0970 ± 0.0094
Jaceosidin	0.15	0.51	y=44286x+948453	97.5	2.3	0.996594	0.0919 ± 0.0097
Isosakuranin	0.45	1.48	y=2358x+5522	98.4	2.6	0.998649	0.0806 ± 0.0158
hydroxygenkwanin	0.32	1.06	y=38811x-1853327	105.7	2.5	0.991817	0.0747 ± 0.0039
Demethyltexasin	0.25	0.82	y=9604x-555191	106.3	0.5	0.989949	0.0734 ± 0.0054
Licoflavonol	0.1	0.35	y=71651x-1170908	101.4	2.3	0.99915	0.0717 ± 0.0064
Glycitein	0.38	1.26	y=24136x+100183	98.8	2.6	0.9991	0.0670 ± 0.0033
Fisetin	0.65	2.15	y=14450x-479127	102.8	2.0	0.997447	0.0555 ± 0.0046
Morin	0.87	2.88	y=8014x-210283	102.5	4.3	0.998248	0.0534 ± 0.0072
Taxifolin-7-O-rhamnoside	0.55	1.83	y=4282x-25649	99.4	4.5	0.99975	0.0377 ± 0.0114
Phlorizin	0.24	0.8	y=9266x+17211	99.8	9.3	0.99945	0.0340 ± 0.0057
Rhoifolin	0.31	1.02	y=9433x+75941	97.6	4.1	0.998198	0.0310 ± 0.0043
Calycosin	0.16	0.55	y=55196x+955688	97.6	1.5	0.997096	0.0286 ± 0.0024
3,7,4'-Trihydroxyflavone	0.39	1.28	y=34646x-495227	99.8	1.8	0.99925	0.0268 ± 0.0034
Homoplantaginin	0.04	0.13	y=15112x-24896	99.7	3.1	0.9995	0.0200 ± 0.0026
Alpinetin	0.07	0.25	y=64519x+1742706	96.9	2.8	0.996143	0.0197 ± 0.0028
7,4'-Dihydroxyflavone	0.22	0.73	y=41777x+1376230	94.9	0.8	0.992421	0.0197 ± 0.0033
Tectorigenin	0.35	1.16	y=28383x-83434	100.3	2.0	0.99945	0.0195 ± 0.0031
Genistein	0.2	0.66	y=65157x+776496	98.1	7.6	0.998549	0.0167 ± 0.0072
Apigenin-7-glucoside	0.09	0.3	y=14779x+105678	98.3	2.7	0.998649	0.0154 ± 0.0032
Chrysosplenetin	0.02	0.07	y=21514x+51517	99.2	3.4	0.9992	0.0151 ± 0.0033
Daidzein	0.13	0.44	y=66026x+1586898	96.5	4.9	0.996042	0.0138 ± 0.0015
Formononetin	0.03	0.1	y=96028x+445435	99.0	2.6	0.9991	0.0131 ± 0.0014
Vitexin	0.13	0.42	y=9477x+40804	99.4	8.4	0.998599	0.0100 ± 0.0036
6,2'-Dihydroxyflavone	0.24	0.8	y=37645x+481928	98.7	1.2	0.998499	0.0100 ± 0.0006
2'-Hydroxygenistein	0.16	0.54	y=57531x+1020459	97.2	1.7	0.997046	0.0099 ± 0.0011
Isoliquiritigenin	0.11	0.35	y=61507x+560713	98.5	3.6	0.998649	0.0083 ± 0.0007
Wogonin	0.18	0.59	y=52191x+286317	99.1	1.8	0.998749	0.0079 ± 0.0004
2'-Hydroxydaidzein	0.25	0.82	y=55441x-126252	99.4	2.0	0.998749	0.0060 ± 0.0003
Eupatorin	0.02	0.06	y=85334x+1222325	98.3	1.0	0.997998	0.0052 ± 0.0007
7-Hydroxy-4H-chromen-4-one	0.1	0.32	y=97387x+2510888	96.1	6.1	0.99564	0.0048 ± 0.0006
(E)-Cardamonin	0.02	0.07	y=222399x+4480990	97.2	1.4	0.996644	0.0022 ± 0.0001
Phloretin	0.08	0.26	y=53935x+366935	99.4	2.6	0.998749	0.0022 ± 0.0004
Loureirin B	0.02	0.08	y=104669x+497381	99.6	1.7	0.9991	0.0015 ± 0.0004
Flavokawain C	0.03	0.1	y=102255x+1042691	98.2	2.1	0.998549	0.0008 ± 0.0001
Kushenol A	0.01	0.02	y=243035x+351391	99.5	1.1	0.99935	0.0006 ± 0.0002
Note:LOD, limit of detection; LOQ, limit of quantification; STD, standard; RSD, relative standard deviation. All concentration values are expressed as mean ± standard deviation (μg/100 g honey, n = 4).
