# Supplementary material
Source: Research Square preprint supplement (doi:10.21203/rs.3.rs-10032042/v1)
Supplement: Supplementary file 3 [file e73166c2a6ab882434e19317.xlsx]

## Sheet: Sheet1
Supplementary Table S2. List of MSI identified metabolites in Manuka honey (MH) based on UHPLC-MS/MS non-targeted metabolomics.
MS2_name	MS2_score	mz	rt	Formula	Ion Mode	Peak Area
Corosolic acid	3.97	471.348	491.8	C30H48O4	NEG	1.02615e+08
(1S,2R,4aS,6aS,6bR,10S,11R,12aR,14bS)-10,11-dihydroxy-1,2,6a,6b,9,9,12a-heptamethyl-2,3,4,5,6,6a,7,8,8a,10,11,12,13,14b-tetradecahydro-1H-picene-4a-carboxylic acid	3.97	471.348	491.8	C30H48O4	NEG	1.02615e+08
(1S,2R,4aS,6aS,6bR,10R,11R,12aR,14bS)-10,11-dihydroxy-1,2,6a,6b,9,9,12a-heptamethyl-2,3,4,5,6,6a,7,8,8a,10,11,12,13,14b-tetradecahydro-1H-picene-4a-carboxylic acid	3.97	471.348	491.8	C30H48O4	NEG	1.02615e+08
Euscaphic acid	3.96	487.342	447	C30H48O5	NEG	5.50458e+07
Echinocystic acid	3.95	471.348	491.8	C30H48O4	NEG	1.02615e+08
Ginkgolic acid C15:0	3.95	347.259	587.2	C22H36O3	NEG	250465
3-Epiursolic Acid	3.95	455.352	523.1	C30H48O3	NEG	412001
(E)-6-(1,3-dihydroxy-4,4,8,10,14-pentamethyl-2,3,5,6,7,9,11,15,16,17-decahydro-1H-cyclopenta[a]phenanthren-17-yl)-2-methyl-hept-2-enoic acid	3.95	471.348	502.1	C30H48O4	NEG	2.83053e+08
Methylsuccinic acid	3.95	131.035	150.1	C5H8O4	NEG	3.15406e+06
Cholesteryl sulfate	3.94	465.303	596.4	C27H46O4S	NEG	2.43615e+06
trans-11-Eicosenoic acid	3.94	309.279	582.1	C20H38O2	NEG	2.08365e+07
cis-11.14-Eicosadienoic acid	3.94	307.263	566.2	C20H36O2	NEG	1.07793e+06
Undecanoic acid	3.94	185.154	489	C11H22O2	NEG	1.76049e+07
Royal jelly acid	3.94	185.118	338.9	C10H18O3	NEG	5.67049e+08
Propionic acid	3.94	73.0293	113.5	C3H6O2	NEG	7.90136e+06
Levulinic acid	3.94	115.04	95.2	C5H8O3	NEG	1.00073e+07
Pinobanksin	3.94	271.06	35.3	C15H12O5	NEG	3.17678e+09
5,7-dihydroxy-2-phenyl-chroman-4-one	3.94	255.065	32.5	C15H12O4	NEG	5.66718e+09
(4aS,6aS,6bR,9R,10S,12aR,14bS)-10-hydroxy-9-(hydroxymethyl)-2,2,6a,6b,9,12a-hexamethyl-1,3,4,5,6,6a,7,8,8a,10,11,12,13,14b-tetradecahydropicene-4a-carboxylic acid	3.93	471.348	491.8	C30H48O4	NEG	1.02615e+08
3-Epioleanolic acid	3.93	455.352	523.1	C30H48O3	NEG	412001
Nervonic acid	3.93	365.341	623.8	C24H46O2	NEG	1.79192e+06
Nonadecanoic acid	3.93	297.279	593.5	C19H38O2	NEG	862086
cis-8,11,14-Eicosatrienoic acid	3.93	305.248	549.3	C20H34O2	NEG	1.01289e+07
Caprylic acid	3.93	143.107	420.6	C8H16O2	NEG	2.16242e+07
6,8-dihydroxy-3-methyl-isochromen-1-one	3.93	191.034	333.8	C10H8O4	NEG	4.06963e+07
5,7-dihydroxy-2-[4-[3,4,5-trihydroxy-6-(hydroxymethyl)tetrahydropyran-2-yl]oxyphenyl]chroman-4-one	3.93	415.103	287.9	C21H22O10	NEG	5.57121e+07
4-Hydroxyphenylglycolic acid	3.93	167.034	94.4	C8H8O4	NEG	3.35889e+07
Adipic acid	3.93	145.05	382.5	C6H10O4	NEG	4.67192e+06
Terephthalic-Acid	3.93	165.019	365.7	C8H6O4	NEG	2.41126e+07
Lactate	3.93	89.024	229.2	C3H6O3	NEG	3.25313e+07
5-Hydroxyvalproic acid	3.93	159.102	156.3	C8H16O3	NEG	4.4218e+08
Caproic acid	3.93	115.076	62.9	C6H12O2	NEG	1.59179e+07
[(2S,3R,4S,5S,6R)-3,4,5-trihydroxy-6-(hydroxymethyl)oxan-2-yl] 4-prop-1-en-2-ylcyclohexene-1-carboxylate	3.93	327.144	47.3	C16H24O7	NEG	4.79842e+07
Emodin	3.93	269.044	36	C15H10O5	NEG	1.00958e+09
1-(5-hydroxy-2,2-dimethyl-chromen-6-yl)ethanone	3.93	217.086	32.9	C13H14O3	NEG	6.93925e+07
(1S,2R,4aS,6aS,6bR,9R,10S,11R,12aR,14bS)-10,11-dihydroxy-9-(hydroxymethyl)-1,2,6a,6b,9,12a-hexamethyl-2,3,4,5,6,6a,7,8,8a,10,11,12,13,14b-tetradecahydro-1H-picene-4a-carboxylic acid	3.92	487.342	447	C30H48O5	NEG	5.50458e+07
(4aR,5R,6aR,6aS,6bR,8aR,9R,10S,12aR,14bS)-5,10-dihydroxy-9-(hydroxymethyl)-2,2,6a,6b,9,12a-hexamethyl-1,3,4,5,6,6a,7,8,8a,10,11,12,13,14b-tetradecahydropicene-4a-carboxylic acid	3.92	487.342	447	C30H48O5	NEG	5.50458e+07
Valproic acid	3.92	143.107	420.6	C8H16O2	NEG	2.16242e+07
5-hydroxy-2-(4-hydroxyphenyl)-7-[(2S,3R,4S,5S,6R)-3,4,5-trihydroxy-6-(hydroxymethyl)tetrahydropyran-2-yl]oxy-chroman-4-one	3.92	415.103	287.9	C21H22O10	NEG	5.57121e+07
Pantothenic acid	3.92	220.117	177.3	C9H17NO5	POS	2.82369e+07
Erucic acid	3.92	337.31	602.2	C22H42O2	NEG	4.00528e+06
Heptadecanoic acid	3.92	269.248	572	C17H34O2	NEG	5.95074e+06
trans-Vaccenic acid	3.92	281.247	562.6	C18H34O2	NEG	2.5703e+08
Pentadecanoic acid	3.92	241.216	548	C15H30O2	NEG	2.05307e+07
2-Hydroxypalmitic acid	3.92	271.227	507.5	C16H32O3	NEG	1.71636e+06
Capric acid	3.92	171.138	470.1	C10H20O2	NEG	4.20896e+07
4-Ethyloctanoic acid	3.92	171.138	458.1	C10H20O2	NEG	6.86972e+06
(1R,8S,9S)-3,4,8-trihydroxy-5-isopropyl-11,11-dimethyl-16-oxatetracyclo[7.5.2.01,10.02,7]hexadeca-2,4,6-trien-15-one	3.92	345.17	428.2	C20H26O5	NEG	3.51987e+06
Isocaproic acid	3.92	115.076	347.2	C6H12O2	NEG	1.35527e+07
2-Ketocaproic acid	3.92	129.055	263.1	C6H10O3	NEG	3.34564e+06
Acetylleucine	3.92	172.097	263.1	C8H15NO3	NEG	1.30316e+07
Phenylacetylglycine	3.92	192.066	258	C10H11NO3	NEG	1.96461e+08
3-Hydroxybenzoic acid	3.92	137.024	248.2	C7H6O3	NEG	1.10905e+09
4-Hydroxyphenethylalcohol	3.92	137.06	236.1	C8H10O2	NEG	1.27747e+08
5-ketocaproate	3.92	129.055	172.2	C6H10O3	NEG	2.84813e+07
Galactose	3.92	179.055	42.2	C6H12O6	NEG	2.59589e+06
3-phenyl-1-(2,4,6-trihydroxyphenyl)prop-2-en-1-one	3.92	255.065	32.5	C15H12O4	NEG	5.66718e+09
6,7,4'-Trihydroxyisoflavone	3.92	269.044	36	C15H10O5	NEG	1.00958e+09
Kaempferol-3-O-galactoside	3.92	449.106	177.5	C21H20O11	POS	1.58777e+07
4-Hydroxyphenylacetic acid	3.92	151.039	198.6	C8H8O3	NEG	3.13623e+08
2-Hydroxy-2-methylbutyric acid	3.92	117.055	147.5	C5H10O3	NEG	4.94309e+07
Cinnamylideneacetic acid	3.92	173.06	89.5	C11H10O2	NEG	9.2216e+07
9-Oxo-10(E),12(E)-octadecadienoic acid	3.92	293.211	48.2	C18H30O3	NEG	3.35192e+07
12-Hydroxystearic acid	3.92	299.258	47.2	C18H36O3	NEG	2.10285e+08
cis-11-Eicosenoic acid	3.92	309.279	34.9	C20H38O2	NEG	1.76879e+07
3-hydroxybenzaldehyde	3.92	121.029	34.2	C7H6O2	NEG	6.94685e+07
4-Hydroxybenzaldehyde	3.92	121.029	34.2	C7H6O2	NEG	6.94685e+07
Xanthoxylin	3.92	195.066	31.5	C10H12O4	NEG	3.62408e+08
(2E,4E)-1-(2,4-dihydroxy-3,5-dimethyl-phenyl)hexa-2,4-dien-1-one	3.92	231.102	31.2	C14H16O3	NEG	5.44828e+07
Pomolic acid	3.91	471.348	491.8	C30H48O4	NEG	1.02615e+08
(1S,2R,4aS,6aS,6bR,9R,10R,11R,12aR)-10,11-dihydroxy-9-(hydroxymethyl)-1,2,6a,6b,9,12a-hexamethyl-2,3,4,5,6,6a,7,8,8a,10,11,12,13,14b-tetradecahydro-1H-picene-4a-carboxylic acid	3.91	487.342	447	C30H48O5	NEG	5.50458e+07
Oleic acid	3.91	281.247	562.6	C18H34O2	NEG	2.5703e+08
ethyl octanoate	3.91	171.138	470.1	C10H20O2	NEG	4.20896e+07
Fructose	3.91	179.055	42.2	C6H12O6	NEG	2.59589e+06
LPC(16:0)	3.91	496.338	507.9	C24H50NO7P	POS	2.08511e+07
LPC(18:2/0:0)	3.91	520.338	490.3	C26H50NO7P	POS	2.15989e+07
Palmitic acid	3.91	255.232	559.7	C16H32O2	NEG	1.28757e+08
cis-9-Palmitoleic acid	3.91	253.216	539.2	C16H30O2	NEG	9.99931e+07
Ursolic acid	3.91	455.352	536.7	C30H48O3	NEG	4.99434e+06
Myristic acid	3.91	227.201	536.1	C14H28O2	NEG	2.3819e+08
(1R,2R,5S,8R,14R,15R,16S)-16-hydroxy-8-isopropenyl-1,2,14,17,17-pentamethyl-pentacyclo[11.7.0.02,10.05,9.014,18]icosane-5,15-dicarboxylic acid	3.91	485.325	477.7	C30H46O5	NEG	1.36587e+07
16-Hydroxypalmitic acid	3.91	271.226	472.6	C16H32O3	NEG	9.26103e+08
Hexadecanedioic acid	3.91	285.206	468.4	C16H30O4	NEG	3.35511e+07
13(S)-HpOTrE	3.91	291.196	463.3	C18H30O4	NEG	1.63024e+07
Pelargonic acid	3.91	157.123	448.9	C9H18O2	NEG	1.12288e+08
5-[(E)-4-carboxy-3-methyl-but-3-enyl]-1,4a-dimethyl-6-methylene-decalin-1-carboxylic acid	3.91	333.206	441.8	C20H30O4	NEG	6.32804e+07
2-hydroxy-1',4,4'a-trimethyl-5'-oxo-4-vinyl-spiro[cyclopentane-1,6'-decalin]-1'-carboxylic acid	3.91	333.206	441.8	C20H30O4	NEG	6.32804e+07
4,18-dihydroxy-15-(3-hydroxy-3-methyl-butyl)-2-methoxy-7,9,13-trioxapentacyclo[10.8.0.03,10.04,8.014,19]icosa-1,3(10),5,11,14,16,18-heptaen-20-one	3.91	425.123	375.3	C23H22O8	NEG	2.29722e+07
Traumatic acid	3.91	227.128	373.7	C12H20O4	NEG	1.4045e+07
13,14-Dihydro-15-ketotetranorprostaglandin F1.beta.	3.91	299.185	338.6	C16H28O5	NEG	5.84397e+06
6-hydroxy-1,5-dimethoxy-xanthen-9-one	3.91	271.06	337	C15H12O5	NEG	4.72179e+07
Indolelactic acid	3.91	204.066	290.3	C11H11NO3	NEG	4.04268e+07
8-Hydroxycarbostyril	3.91	160.04	264.1	C9H7NO2	NEG	4.64867e+07
Chlorogenic acid	3.91	353.086	234.9	C16H18O9	NEG	2.21921e+08
Hydroxytyrosol	3.91	153.055	206	C8H10O3	NEG	2.66196e+07
Dihydroxyacetone	3.91	89.0241	52.4	C3H6O3	NEG	4.20501e+07
4-Hydroxyphenylacetaldehyde	3.91	135.045	33.6	C8H8O2	NEG	4.38048e+07
Creatine	3.91	132.076	357	C4H9N3O2	POS	297015
Riboflavin	3.91	377.144	223.1	C17H20N4O6	POS	4.99566e+06
Lappaconine	3.91	424.268	192.3	C23H37NO6	POS	206763
(E)-3-(4-hydroxyphenyl)-N-[4-[[(E)-3-(4-hydroxyphenyl)prop-2-enoyl]-[3-[[(E)-3-(4-hydroxyphenyl)prop-2-enoyl]amino]propyl]amino]butyl]prop-2-enamide	3.91	584.273	43.1	C34H37N3O6	POS	7.1699e+07
1-ethyl-7-methoxy-9H-pyrido[3,4-b]indole	3.91	227.117	36.2	C14H14N2O	POS	5.23063e+07
7,8-Dihydroxyflavone	3.91	255.064	35.5	C15H10O4	POS	1.20175e+08
4-Hydroxybenzoic acid	3.91	137.024	172.9	C7H6O3	NEG	1.53981e+09
Benzoic acid	3.91	121.029	107.6	C7H6O2	NEG	9.89876e+07
Lumichrome	3.91	241.072	53.3	C12H10N4O2	NEG	2.19951e+08
13(S)-HODE	3.91	295.227	47.9	C18H32O3	NEG	3.26649e+07
N-acetyldopamine	3.91	194.082	45.8	C10H13NO3	NEG	8.36342e+07
12-Methyltridecanoic acid	3.91	227.201	39.9	C14H28O2	NEG	5.98214e+07
Salicylic acid	3.91	137.024	33.9	C7H6O3	NEG	1.40777e+09
2,6-Dihydroxybenzoic acid	3.91	153.019	23.8	C7H6O4	NEG	6.96138e+07
(3,11-dihydroxy-7,7,11-trimethyl-6,15-dioxatetracyclo[10.2.1.05,14.08,13]pentadeca-1(14),2,4-trien-4-yl)-phenyl-methanone	3.91	379.155	22.1	C23H24O5	NEG	1.63042e+07
(4aS,6aS,6bR,9R,10R,11R,12aR)-10,11-dihydroxy-9-(hydroxymethyl)-2,2,6a,6b,9,12a-hexamethyl-1,3,4,5,6,6a,7,8,8a,10,11,12,13,14b-tetradecahydropicene-4a-carboxylic acid	3.9	487.342	447	C30H48O5	NEG	5.50458e+07
(4aS,6aS,6bR,10S,12aR)-10-hydroxy-2,2,6a,6b,9,9,12a-heptamethyl-1,3,4,5,6,6a,7,8,8a,10,11,12,13,14b-tetradecahydropicene-4a-carboxylic acid	3.9	455.352	523.1	C30H48O3	NEG	412001
Paullinic acid	3.9	309.279	582.1	C20H38O2	NEG	2.08365e+07
2-Methylheptanoic acid	3.9	143.107	420.6	C8H16O2	NEG	2.16242e+07
Methyl pentadecanoate	3.9	255.232	559.7	C16H32O2	NEG	1.28757e+08
5,9-dimethyltetracyclo[11.2.1.01,10.04,9]hexadecane-5,14-dicarboxylic acid	3.9	333.206	441.8	C20H30O4	NEG	6.32804e+07
Glyceraldehyde	3.9	89.0241	52.4	C3H6O3	NEG	4.20501e+07
Stearamide	3.9	284.293	562.1	C18H37NO	POS	1.58547e+08
Palmitamide	3.9	256.262	537.6	C16H33NO	POS	2.5997e+08
trans-Chalcone	3.9	209.095	435.4	C15H12O	POS	7.96649e+06
5,7-dihydroxy-2-(4-hydroxyphenyl)-3,6-dimethoxy-chromen-4-one	3.9	331.08	356.2	C17H14O7	POS	3.66736e+07
5,7-dihydroxy-2-(2-hydroxyphenyl)-6,8-dimethoxy-chromen-4-one	3.9	331.08	356.2	C17H14O7	POS	3.66736e+07
6-Aminonicotinic acid	3.9	139.049	47.7	C6H6N2O2	POS	1.70558e+06
Betaine	3.9	118.086	44.9	C5H11NO2	POS	2.28252e+06
PC(34:3)	3.9	756.55	635.5	C42H78NO8P	POS	2.5349e+07
Linoleic acid	3.9	279.231	543.6	C18H32O2	NEG	6.45289e+08
alpha-Linolenic acid	3.9	277.216	527.6	C18H30O2	NEG	3.04824e+09
Stearidonic acid	3.9	275.2	512.9	C18H28O2	NEG	4.39187e+07
Dodecanoic acid	3.9	199.169	506.8	C12H24O2	NEG	1.62539e+08
3-Hydroxylauric acid	3.9	215.165	456	C12H24O3	NEG	1.36237e+07
(Z)-2-oct-7-enylpent-2-enedioic acid	3.9	239.128	420.9	C13H20O4	NEG	1.23538e+08
3-Hydroxydecanoic acid	3.9	187.133	410.1	C10H20O3	NEG	4.08091e+08
Dodecanedioic acid	3.9	229.144	396.1	C12H22O4	NEG	2.0377e+08
Kaempferol 3-methyl ether	3.9	299.055	362.3	C16H12O6	NEG	3.64211e+07
methyl 5-hydroxy-1H-indole-3-carboxylate	3.9	190.05	265.6	C10H9NO3	NEG	1.61962e+07
Methylgallate	3.9	183.029	242.6	C8H8O5	NEG	1.65686e+08
3-Methyladipic acid	3.9	159.066	239.2	C7H12O4	NEG	2.76315e+07
Stearic acid	3.9	283.263	582.9	C18H36O2	NEG	6.93242e+07
2-Hydroxystearic acid	3.9	299.258	47.2	C18H36O3	NEG	2.10285e+08
Pyrrolidine	3.9	72.0805	286.8	C4H9N	POS	1.2343e+07
Nicotiflorin	3.9	595.163	248.5	C27H30O15	POS	699756
Leu-Ile	3.9	245.185	197.4	C12H24N2O3	POS	1.10591e+06
Isopentenyladenosine	3.9	336.165	55.3	C15H21N5O4	POS	3.57835e+06
Myosmine	3.9	147.091	44.3	C9H10N2	POS	1.216e+07
4-Methylquinolin-2-ol	3.9	160.075	41.3	C10H9NO	POS	3.43289e+07
1,6-dihydroxy-3-methoxy-8-methyl-xanthen-9-one	3.9	273.074	29.3	C15H12O5	POS	1.51836e+07
3,7-dihydroxy-9-methoxy-1-methyl-benzo[c]chromen-6-one	3.9	273.074	29.3	C15H12O5	POS	1.51836e+07
2-(3,4-dimethoxyphenyl)-3,5-dihydroxy-7-methoxy-chromen-4-one	3.9	345.095	29.2	C18H16O7	POS	3.51445e+07
(+)-Usnic acid	3.9	345.095	29.2	C18H16O7	POS	3.51445e+07
Tris(2,4-di-tert-butylphenyl)phosphate	3.9	663.45	29	C42H63O4P	POS	1.17528e+09
4-[(2R,3R)-3-[(3,4-dimethoxyphenyl)methyl]-4-methoxy-2-(methoxymethyl)butyl]-1,2-dimethoxy-benzene	3.9	401.231	26.5	C24H34O6	POS	2.99516e+07
Proline	3.9	116.07	318.3	C5H9NO2	POS	6.47345e+06
Glutaric acid	3.9	131.035	393.4	C5H8O4	NEG	1.09057e+06
Caffeic acid	3.9	179.034	228.5	C9H8O4	NEG	1.78633e+09
7-hydroxy-2-(4-hydroxyphenyl)-5-[(2S,3R,4S,5S,6R)-3,4,5-trihydroxy-6-(hydroxymethyl)tetrahydropyran-2-yl]oxy-chroman-4-one	3.9	433.112	157.6	C21H22O10	NEG	1.33538e+07
Rhamnose	3.9	145.05	148.4	C6H12O5	NEG	7.76484e+06
(S)-Abscisic acid	3.9	263.128	92.5	C15H20O4	NEG	2.2072e+08
2',4',6'-Trihydroxyacetophenone	3.9	167.034	51.3	C8H8O4	NEG	1.50757e+08
3,4,5-trihydroxybenzaldehyde	3.9	153.019	47.7	C7H6O4	NEG	1.18367e+08
3,4-Dihydroxyphenylacetic acid	3.9	149.024	39	C8H8O4	NEG	1.52936e+08
4-hydroxy-9-(4-hydroxy-3,5-dimethoxy-phenyl)-5a,6,8a,9-tetrahydro-5H-isobenzofuro[5,6-f][1,3]benzodioxol-8-one	3.9	399.109	30.5	C21H20O8	NEG	1.0456e+08
(1S,2R,9R,11R,12R,15R)-11-hydroxy-2,6,9,15-tetramethyl-13-oxatetracyclo[10.2.1.02,10.05,9]pentadeca-4,6-diene-3,8,14-trione	3.9	315.123	30	C18H20O5	NEG	1.21614e+08
5-acetyl-2-hydroxy-benzoic acid	3.9	179.034	29.2	C9H8O4	NEG	4.02378e+08
3-Hydroxycinnamic acid	3.89	163.04	313.3	C9H8O3	NEG	9.12734e+07
(1R,2R,4aS,6aS,6bR,10S,11R,12aR)-1,10,11-trihydroxy-1,2,6a,6b,9,9,12a-heptamethyl-2,3,4,5,6,6a,7,8,8a,10,11,12,13,14b-tetradecahydropicene-4a-carboxylic acid	3.89	487.342	447	C30H48O5	NEG	5.50458e+07
Sorbose	3.89	179.055	42.2	C6H12O6	NEG	2.59589e+06
hexyl hexanoate	3.89	199.169	506.8	C12H24O2	NEG	1.62539e+08
PC(16:0/20:4)	3.89	782.567	631.2	C44H80NO8P	POS	1.25619e+07
PC(36:5)	3.89	780.55	604.2	C44H78NO8P	POS	8.84504e+06
Oleamide	3.89	282.277	540.9	C18H35NO	POS	1.06407e+09
NAE(16:0)	3.89	300.288	532.2	C18H37NO2	POS	9.49626e+06
tributyl 2-acetoxypropane-1,2,3-tricarboxylate	3.89	403.231	488.3	C20H34O8	POS	8.99592e+06
Neocryptotanshinone	3.89	315.158	428.6	C19H22O4	POS	1.84232e+07
8,8-dimethylpyrano[2,3-f]chromen-2-one	3.89	229.085	400	C14H12O3	POS	2.71336e+07
3,5,7-trihydroxy-8-methoxy-2-(4-methoxyphenyl)chromen-4-one	3.89	331.08	399.3	C17H14O7	POS	3.67551e+07
7-hydroxy-2-(4-methoxyphenyl)chromen-4-one	3.89	269.079	369.7	C16H12O4	POS	8.28986e+08
Bauhiniaside B	3.89	417.153	352.1	C22H26O9	POS	1.40358e+07
1-methyl-2-propyl-quinolin-4-one	3.89	202.122	293.5	C13H15NO	POS	2.92011e+07
Fraxinol	3.89	223.059	267.3	C11H10O5	POS	5.87518e+07
4-methoxy-6-methyl-7,8-dihydro-5H-[1,3]dioxolo[4,5-g]isoquinoline	3.89	222.112	195.6	C12H15NO3	POS	1.30945e+06
Octadecanedioic acid	3.89	313.237	497.7	C18H34O4	NEG	2.01482e+07
2-hydroxydodecanoic acid	3.89	215.165	472.2	C12H24O3	NEG	1.11365e+07
14,16-dihydroxy-4-methyl-3-oxabicyclo[10.4.0]hexadeca-1(12),13,15-trien-2-one	3.89	277.144	463.3	C16H22O4	NEG	2.01242e+07
ethyl 2,2-dimethyl-3-(2-methylprop-1-enyl)cyclopropanecarboxylate	3.89	195.138	421.1	C12H20O2	NEG	1.05939e+07
(Z)-9,10,11-trihydroxyoctadec-12-enoic acid	3.89	329.232	402.7	C18H34O5	NEG	4.45527e+07
2-Hydroxyoctanoic acid	3.89	159.102	370.5	C8H16O3	NEG	8.96164e+06
ethyl (2R)-3-(3,4-dihydroxyphenyl)-2-[(E)-3-(3,4-dihydroxyphenyl)prop-2-enoyl]oxy-propanoate	3.89	387.107	332.7	C20H20O8	NEG	3.59215e+07
2-Hydroxyphenylacetic acid	3.89	151.04	266.9	C8H8O3	NEG	7.39324e+07
(4E)-8-hydroxy-4-(2-hydroxy-1-methyl-ethylidene)-10-oxatricyclo[7.2.1.01,5]dodecane-8-carboxylic acid	3.89	281.138	262.6	C15H22O5	NEG	4.01986e+07
1-[4-hydroxy-2-methyl-6-[(2S,3R,4S,5S,6R)-3,4,5-trihydroxy-6-(hydroxymethyl)tetrahydropyran-2-yl]oxy-phenyl]ethanone	3.89	327.107	246	C15H20O8	NEG	7.71794e+08
Ethylmalonic acid	3.89	131.035	131.5	C5H8O4	NEG	7.87395e+06
Phloroglucinol	3.89	125.024	96.9	C6H6O3	NEG	8.65009e+06
Mesaconic acid	3.89	129.019	96.2	C5H6O4	NEG	2.73896e+06
Sulfuretin	3.89	269.044	36	C15H10O5	NEG	1.00958e+09
p-Toluquinone	3.89	121.029	107.6	C7H6O2	NEG	9.89876e+07
5-hydroxy-2-(4-hydroxyphenyl)-3-[(2S,3R,4S,5S,6R)-3,4,5-trihydroxy-6-(hydroxymethyl)tetrahydropyran-2-yl]oxy-7-[(2S,3R,4R,5R,6S)-3,4,5-trihydroxy-6-methyl-tetrahydropyran-2-yl]oxy-chromen-4-one	3.89	595.163	248.5	C27H30O15	POS	699756
2,3-Dihydroxybenzoic acid (Pyrocatechuic acid)	3.89	153.019	47.7	C7H6O4	NEG	1.18367e+08
Colchicine	3.89	400.174	45.3	C22H25NO6	POS	1.15089e+08
1,3-dihydroxy-6-(hydroxymethyl)-8-methoxy-anthracene-9,10-dione	3.89	301.069	42.7	C16H12O6	POS	2.60675e+07
(2Z)-6-hydroxy-2-[(4-hydroxy-3-methoxy-phenyl)methylene]benzofuran-3-one	3.89	285.075	35.8	C16H12O5	POS	3.14236e+07
Rubiadin-1-methyl ether	3.89	269.079	30.6	C16H12O4	POS	1.04492e+07
Oxalic acid	3.89	88.9877	423	C2H2O4	NEG	4.59959e+06
Malonic acid	3.89	103.003	389.7	C3H4O4	NEG	2.84711e+06
5,7-dihydroxy-2-(4-hydroxyphenyl)-6-[3,4,5-trihydroxy-6-(hydroxymethyl)tetrahydropyran-2-yl]chromen-4-one	3.89	431.097	223.1	C21H20O10	NEG	1.7988e+07
2-[3-hydroxy-5-[(E)-2-(4-hydroxyphenyl)vinyl]phenoxy]-6-(hydroxymethyl)tetrahydropyran-3,4,5-triol	3.89	389.123	145.8	C20H22O8	NEG	1.09593e+08
(2S,3R,4S,5S,6R)-2-[3-hydroxy-5-[(Z)-2-(4-hydroxyphenyl)vinyl]phenoxy]-6-(hydroxymethyl)tetrahydropyran-3,4,5-triol	3.89	389.123	145.8	C20H22O8	NEG	1.09593e+08
(2R,3S,4S,5R,6S)-2-(hydroxymethyl)-6-(2-hydroxyphenoxy)tetrahydropyran-3,4,5-triol	3.89	253.071	145.4	C12H16O7	NEG	1.12002e+08
Isovaleric acid	3.89	101.06	80.4	C5H10O2	NEG	2.31149e+07
Valeric acid	3.89	101.06	80.4	C5H10O2	NEG	2.31149e+07
Kaempferol	3.89	285.039	44.8	C15H10O6	NEG	1.46679e+08
(2S,3S,4aS)-2,3,7-trihydroxy-9-methoxy-4a-methyl-3,4-dihydro-2H-benzo[c]chromen-6-one	3.89	291.086	38.3	C15H16O6	NEG	8.59572e+07
4-ethoxychromen-2-one	3.89	189.055	32.2	C11H10O3	NEG	9.4335e+07
Tetradecyl sulfate (sodium)	3.89	293.178	23.1	C14H30O4S	NEG	5.47449e+08
Bayogenin	3.88	487.342	447	C30H48O5	NEG	5.50458e+07
(1S,4aR,6aS,6bR,10R,11R,12aR,14bS)-1,10,11-trihydroxy-2,2,6a,6b,9,9,12a-heptamethyl-1,3,4,5,6,6a,7,8,8a,10,11,12,13,14b-tetradecahydropicene-4a-carboxylic acid	3.88	487.342	447	C30H48O5	NEG	5.50458e+07
gamma-Linolenic acid	3.88	277.216	527.6	C18H30O2	NEG	3.04824e+09
Gnaphaliin	3.88	315.085	399.3	C17H14O6	POS	3.6932e+07
ESCULETIN	3.88	179.033	256.6	C9H6O4	POS	2.34483e+07
5-methyl-4-[(2S,3R,4S,5S,6R)-3,4,5-trihydroxy-6-(hydroxymethyl)tetrahydropyran-2-yl]oxy-chromen-2-one	3.88	339.106	256.2	C16H18O8	POS	4.30875e+07
5-hydroxy-2-methyl-7-[(2S,3R,4S,5S,6R)-3,4,5-trihydroxy-6-(hydroxymethyl)tetrahydropyran-2-yl]oxy-chromen-4-one	3.88	355.101	234.9	C16H18O9	POS	4.7921e+07
Phenylalanine	3.88	166.085	101.9	C9H11NO2	POS	4.089e+07
Kynurenine	3.88	209.091	100.3	C10H12N2O3	POS	191068
Trehalose	3.88	365.104	43.7	C12H22O11	POS	3.11975e+06
(E)-11-hydroxyoctadec-9-enoic acid	3.88	297.242	488.2	C18H34O3	NEG	4.08554e+08
5-[(Z)-5-hydroxy-3-methyl-pent-3-enyl]-1,4a-dimethyl-6-methylene-decalin-1-carboxylic acid	3.88	319.227	455.6	C20H32O3	NEG	1.06833e+07
(2Z,6E,10E)-12-hydroxy-6,10-dimethyl-2-(4-methylpent-3-enyl)dodeca-2,6,10-trienoic acid	3.88	319.227	455.6	C20H32O3	NEG	1.06833e+07
(2E,6E,10E)-12-hydroxy-6,10-dimethyl-2-(4-methylpent-3-enyl)dodeca-2,6,10-trienoic acid	3.88	319.227	455.6	C20H32O3	NEG	1.06833e+07
3-(1,2-dihydroxypropyl)-1,6,8-trihydroxy-anthracene-9,10-dione	3.88	329.066	339.8	C17H14O7	NEG	9.05259e+07
4-Methoxycinnamic acid	3.88	177.055	339.1	C10H10O3	NEG	6.02768e+07
(2R)-5,7-dihydroxy-2-(4-hydroxyphenyl)-6-methoxy-chroman-4-one	3.88	301.071	336.4	C16H14O6	NEG	5.4466e+07
1,3,8,9-tetrahydroxybenzofurano[3,2-c]chromen-6-one	3.88	299.019	317	C15H8O7	NEG	5.57077e+07
4-Chromanone	3.88	147.045	316.2	C9H8O2	NEG	4.08127e+08
Propylgallate	3.88	211.06	302.9	C10H12O5	NEG	8.51371e+09
Neoisoliquiritin	3.88	417.118	298.6	C21H22O9	NEG	5.52472e+07
3-[(2S,3R,4R,5R,6S)-4,5-dihydroxy-6-methyl-3-[(2S,3R,4S,5S,6R)-3,4,5-trihydroxy-6-(hydroxymethyl)tetrahydropyran-2-yl]oxy-tetrahydropyran-2-yl]oxy-5,7-dihydroxy-2-(4-hydroxyphenyl)chromen-4-one	3.88	593.149	294.4	C27H30O15	NEG	5.29175e+06
Hydroxyisocaproic acid	3.88	131.071	259.7	C6H12O3	NEG	6.13165e+09
2-Hydroxyhexanoic acid	3.88	131.071	259.7	C6H12O3	NEG	6.13165e+09
3-(4-Methoxy-3-methyl-6-oxopyran-2-yl)propanoic acid	3.88	211.06	254.5	C10H12O5	NEG	6.70611e+07
4,7,7-trimethyl-3-oxo-2-oxabicyclo[2.2.1]heptane-1-carboxylic acid	3.88	197.081	245.4	C10H14O4	NEG	2.86983e+07
3-Hydroxyphenylacetic acid	3.88	151.04	244.3	C8H8O3	NEG	3.25391e+08
2-Hydroxycinnamic acid	3.88	163.04	228.5	C9H8O3	NEG	2.35897e+07
1-[2,3-dihydroxy-4-[(2S,3R,4S,5S,6R)-3,4,5-trihydroxy-6-(hydroxymethyl)tetrahydropyran-2-yl]oxy-phenyl]ethanone	3.88	311.076	226.8	C14H18O9	NEG	3.11811e+07
3-Isopropylmalic acid	3.88	175.061	215.3	C7H12O5	NEG	8.70673e+07
methyl 8-hydroxy-9-oxo-xanthene-1-carboxylate	3.88	269.044	36	C15H10O5	NEG	1.00958e+09
7-hydroxy-3-(4-hydroxyphenyl)-5-methoxy-chromen-4-one	3.88	285.075	35.8	C16H12O5	POS	3.14236e+07
Isoformononetin	3.88	269.079	30.6	C16H12O4	POS	1.04492e+07
Ectoine	3.88	143.081	338.9	C6H10N2O2	POS	550950
7-hydroxy-2-[4-[(2S,3R,4S,5S,6R)-3,4,5-trihydroxy-6-(hydroxymethyl)tetrahydropyran-2-yl]oxyphenyl]chroman-4-one	3.88	419.132	143.1	C21H22O9	POS	3.37201e+07
3,5-Dimethoxycinnamic acid	3.88	191.069	90.3	C11H12O4	POS	2.0207e+07
trans-3'-Hydroxycotinine	3.88	193.096	68	C10H12N2O2	POS	2.51965e+07
2-(1-hydroxyethyl)-3H-quinazolin-4-one	3.88	173.07	36	C10H10N2O2	POS	9.48157e+07
Hamaudol	3.88	277.106	34.4	C15H16O5	POS	1.29686e+08
7-Methoxy-4-methylcoumarin	3.88	191.069	31.2	C11H10O3	POS	4.82251e+07
Azelaic acid	3.88	187.097	348.5	C9H16O4	NEG	2.50197e+08
Veratric acid	3.88	181.05	125.1	C9H10O4	NEG	1.53655e+09
2-Hydroxymethyl benzoic acid	3.88	151.039	92.1	C8H8O3	NEG	4.71903e+08
Quercetin	3.88	301.034	53.2	C15H10O7	NEG	3.16449e+08
(9a-methoxy-3,5,8a-trimethyl-2,7-dioxo-4,4a,8,9-tetrahydrobenzo[f][1]benzofuran-8-yl) acetate	3.88	315.124	37	C18H22O6	NEG	1.34527e+08
4-Methylsalicylic acid	3.88	151.039	35.3	C8H8O3	NEG	2.11078e+08
Hinokitiol	3.88	163.076	32.9	C10H12O2	NEG	2.69761e+07
1,3,8-trihydroxy-6-(2-hydroxypropyl)anthracene-9,10-dione	3.88	313.07	32.2	C17H14O6	NEG	1.73447e+09
1-(3-acetyl-2,4,6-trihydroxy-phenyl)ethanone	3.88	209.045	27.6	C10H10O5	NEG	4.91718e+08
9-methoxy-4,4-dimethyl-13-phenyl-6,14-dioxatetracyclo[8.4.0.02,7.03,5]tetradeca-1,7,9-trien-11-one	3.88	335.129	21.5	C21H20O4	NEG	5.25492e+08
(E)-8-hydroxy-2,6-dimethyl-oct-2-enoic acid	3.87	185.118	338.9	C10H18O3	NEG	5.67049e+08
Allose	3.87	179.055	42.2	C6H12O6	NEG	2.59589e+06
3,5-dihydroxy-2-(3-hydroxy-4-methoxy-phenyl)-7-methoxy-chromen-4-one	3.87	331.08	399.3	C17H14O7	POS	3.67551e+07
Sucrose	3.87	365.104	43.7	C12H22O11	POS	3.11975e+06
Melibiose	3.87	365.104	43.7	C12H22O11	POS	3.11975e+06
Maltose	3.87	365.104	43.7	C12H22O11	POS	3.11975e+06
14-(hydroxymethyl)-5,9-dimethyl-tetracyclo[11.2.1.01,10.04,9]hexadecane-5-carboxylic acid	3.87	319.227	455.6	C20H32O3	NEG	1.06833e+07
(5S,9R)-14-(hydroxymethyl)-5,9-dimethyl-tetracyclo[11.2.1.01,10.04,9]hexadecane-5-carboxylic acid	3.87	319.227	455.6	C20H32O3	NEG	1.06833e+07
Phloroglucinaldehyde	3.87	153.019	284.7	C7H6O4	NEG	4.0136e+06
Erucamide	3.87	338.34	583.8	C22H43NO	POS	3.1439e+09
Linoleamide	3.87	280.262	520.9	C18H33NO	POS	5.81067e+07
5-hydroxy-3,7-dimethoxy-2-phenyl-chromen-4-one	3.87	299.09	448.1	C17H14O5	POS	3.51065e+07
5-Hydroxy-7,8-dimethoxyflavone,Moslosooflavone	3.87	299.09	410.1	C17H14O5	POS	1.00175e+08
3,7-Di-O-methylquercetin	3.87	331.08	385.6	C17H14O7	POS	1.26323e+08
methyl (2S)-5-oxopyrrolidine-2-carboxylate	3.87	144.065	109	C6H9NO3	POS	2.16992e+06
Tetracosanoic acid	3.87	367.357	555.8	C24H48O2	NEG	4.52682e+06
Myristoleic acid	3.87	225.185	515	C14H26O2	NEG	2.87959e+07
Ellagic acid	3.87	300.998	500.5	C14H6O8	NEG	1.89695e+07
3,9-dihydroxy-1,4,7,10-tetramethyl-benzo[b][1,4]benzodioxepin-6-one	3.87	299.091	380	C17H16O5	NEG	1.77669e+07
(2S,3R,4S,5S,6R)-2-[5-[(E)-2-(3,5-dihydroxyphenyl)vinyl]-2-methoxy-phenoxy]-6-(hydroxymethyl)tetrahydropyran-3,4,5-triol	3.87	419.133	278.4	C21H24O9	NEG	6.44184e+07
Hippuric acid	3.87	178.05	231.1	C9H9NO3	NEG	1.05635e+08
3-methoxy-4-[3,4,5-trihydroxy-6-(hydroxymethyl)tetrahydropyran-2-yl]oxy-benzoic acid	3.87	329.087	195.4	C14H18O9	NEG	8.4685e+06
5-Hydroxymethylfurfural	3.87	125.024	131.1	C6H6O3	NEG	3.31864e+07
4-Hydroxycinnamic acid	3.87	163.039	166.3	C9H8O3	NEG	1.1161e+09
6-hydroxy-2-(2-hydroxyphenyl)chromen-4-one	3.87	255.064	35.5	C15H10O4	POS	1.20175e+08
Ile-Leu	3.87	245.185	197.4	C12H24N2O3	POS	1.10591e+06
5-Hydroxytryptophol (5HTOL)	3.87	160.075	41.3	C10H11NO2	POS	3.43289e+07
N-[(7S)-1,2,3,10-tetramethoxy-9-oxo-6,7-dihydro-5H-benzo[a]heptalen-7-yl]acetamide	3.87	400.174	45.3	C22H25NO6	POS	1.15089e+08
5,7,11,19-tetraoxapentacyclo[10.8.0.02,10.04,8.013,18]icosa-2,4(8),9,13(18),14,16-hexaen-16-ol	3.87	285.075	35.8	C16H12O5	POS	3.14236e+07
Atrazine	3.87	216.101	39.8	C8H14ClN5	POS	4.27173e+07
6-Methylflavone	3.87	237.09	31.4	C16H12O2	POS	5.65491e+06
Suberic acid	3.87	173.081	364	C8H14O4	NEG	3.33534e+08
3a-[(2S,3R,4S,5R,6R)-3,5-dihydroxy-6-[[(2R,3R,4S,5S,6R)-3,4,5-trihydroxy-6-(hydroxymethyl)tetrahydropyran-2-yl]oxymethyl]-4-[(2S,3R,4R,5R,6S)-3,4,5-trihydroxy-6-methyl-tetrahydropyran-2-yl]oxy-tetrahydropyran-2-yl]oxycarbonyl-9-hydroxy-1-isopropenyl-5b,8,8,11a-tetramethyl-1,2,3,4,5,6,7,7a,9,10,11,11b,12,13,13a,13b-hexadecahydrocyclopenta[a]chrysene-5a-carboxylic acid	3.87	955.487	305.3	C48H76O19	NEG	253389
2-oxindole-3-acetate	3.87	190.05	220.3	C10H9NO3	NEG	6.76004e+06
Kynurenic acid	3.87	188.035	190.2	C10H7NO3	NEG	4.98628e+08
Vanillic acid	3.87	167.034	163.7	C8H8O4	NEG	1.45593e+08
3-(2,4-Dihydroxypentyl)-6,8-dihydroxyisochromen-1-one	3.87	279.086	38.6	C14H16O6	NEG	4.46797e+08
3-hydroxy-2-[(Z)-oct-2-enyl]pentanedioic acid	3.87	239.128	37.7	C13H22O5	NEG	3.05296e+08
(1R,2R,4aS,6aS,6bR,10S,12aR)-1,10-dihydroxy-1,2,6a,6b,9,9,12a-heptamethyl-2,3,4,5,6,6a,7,8,8a,10,11,12,13,14b-tetradecahydropicene-4a-carboxylic acid	3.87	453.336	29.2	C30H48O4	NEG	1.56904e+08
Anemosapogenin	3.86	471.348	491.8	C30H48O4	NEG	1.02615e+08
5Z,8Z,11Z-Eicosatrienoic acid	3.86	305.248	549.3	C20H34O2	NEG	1.01289e+07
Nicotinamide N-oxide	3.86	139.049	47.7	C6H6N2O2	POS	1.70558e+06
Pimelic acid	3.86	159.066	239.2	C7H12O4	NEG	2.76315e+07
Xanyhyletin	3.86	229.085	400	C14H12O3	POS	2.71336e+07
(2E,4Z)-9-oxooctadeca-2,4-dienoic acid	3.86	293.211	479.4	C18H30O3	NEG	1.38687e+08
1-[2-hydroxy-6-methyl-4-[(2S,3R,4S,5S,6R)-3,4,5-trihydroxy-6-(hydroxymethyl)tetrahydropyran-2-yl]oxy-phenyl]ethanone	3.86	327.107	246	C15H20O8	NEG	7.71794e+08
2-Methylglutaric acid	3.86	145.05	211	C6H10O4	NEG	1.2424e+08
3-hydroxy-2-(4-hydroxyphenyl)chromen-4-one	3.86	255.064	405.6	C15H10O4	POS	1.98781e+09
3-(1H-benzimidazol-2-yl)-7-(diethylamino)chromen-2-one	3.86	334.153	388.2	C20H19N3O2	POS	5.2351e+07
Eugenin	3.86	207.064	361.7	C11H10O4	POS	3.47788e+07
Loureirin C	3.86	273.111	353.5	C16H16O4	POS	3.09994e+07
Demethoxycapillarisin	3.86	287.054	349.6	C15H10O6	POS	3.8511e+08
Pratensein	3.86	301.069	342.5	C16H12O6	POS	4.15548e+07
5,7-dimethoxy-6-[(E)-3-oxobut-1-enyl]chromen-2-one	3.86	275.09	331	C15H14O5	POS	2.0563e+08
2-(2,6-dihydroxyphenyl)-3,5,7-trihydroxy-chromone	3.86	303.048	295.9	C15H10O7	POS	7.41351e+06
18α-Glycyrrhetinic acid	3.86	469.331	507.6	C30H46O4	NEG	1.06847e+07
6-[(3E,5E,7S)-5,7-dimethyl-2-oxo-nona-3,5-dienyl]-2,4-dihydroxy-3-methyl-benzaldehyde	3.86	315.159	458.5	C19H24O4	NEG	5.3632e+06
Licoricone	3.86	381.133	424.5	C22H22O6	NEG	2.46456e+07
3-hydroxy-2-octyl-pentanedioic acid	3.86	241.144	421.2	C13H24O5	NEG	1.93076e+08
8-hydroxy-6-methyl-2-(4-methylpent-3-enyl)octa-2,6-dienoic acid	3.86	251.164	414.2	C15H24O3	NEG	2.08789e+07
14-hydroxy-14-(hydroxymethyl)-5,9-dimethyl-tetracyclo[11.2.1.01,10.04,9]hexadecane-5-carboxylic acid	3.86	335.222	403	C20H32O4	NEG	3.03717e+06
3-Hydroxyoctanoic acid	3.86	159.102	349.1	C8H16O3	NEG	1.02852e+08
3,5-Dimethoxybenzoic acid	3.86	181.05	337.4	C9H10O4	NEG	5.08878e+08
(E)-4-hydroxydodec-2-enedioic acid	3.86	243.123	313.2	C12H20O5	NEG	2.07864e+07
Isoorientin	3.86	447.092	270.4	C21H20O11	NEG	4.22296e+07
N-[2-(4-hydroxyphenyl)ethyl]acetamide	3.86	178.087	237.5	C10H13NO2	NEG	5.20137e+07
2-[(2-aminobenzoyl)amino]propanoic acid	3.86	189.066	232.9	C10H12N2O3	NEG	512436
Chorismic acid	3.86	225.04	222	C10H10O6	NEG	2.88817e+07
3,4-Dihydroxybenzoic acid (Protocatechuic acid)	3.86	153.019	206.8	C7H6O4	NEG	1.89062e+08
Methylmalonic acid	3.86	117.019	77.1	C4H6O4	NEG	4.44863e+06
2-Methylvaleric acid	3.86	115.076	62.9	C6H12O2	NEG	1.59179e+07
3,5-dihydroxy-2-(4-hydroxyphenyl)-7-[(2S,3R,4S,5S,6R)-3,4,5-trihydroxy-6-(hydroxymethyl)tetrahydropyran-2-yl]oxy-chromen-4-one	3.86	449.106	177.5	C21H20O11	POS	1.58777e+07
2-(3,4-dihydroxyphenyl)-5,7-dihydroxy-6-[3,4,5-trihydroxy-6-(hydroxymethyl)tetrahydropyran-2-yl]chromen-4-one	3.86	449.106	438.8	C21H20O11	POS	853834
Kaempferitrin	3.86	579.168	179.9	C27H30O14	POS	8.25305e+06
2,6-Dimethoxybenzoic acid	3.86	165.054	161.4	C9H10O4	POS	1.15735e+07
4-Vinylphenol	3.86	121.064	33.8	C8H8O	POS	7.28371e+07
1,3,7-trihydroxyxanthen-9-one	3.86	245.043	27.3	C13H8O5	POS	4.29482e+06
Sebacic acid	3.86	201.112	330.7	C10H18O4	NEG	3.17471e+09
3-hydroxy-4-(1,5,6-trihydroxy-1,5-dimethyl-hexyl)benzoic acid	3.86	297.133	257.1	C15H22O6	NEG	1.23741e+06
(1R,3R,4S,5R)-1,3,4-trihydroxy-5-[(E)-3-(4-hydroxyphenyl)prop-2-enoyl]oxy-cyclohexanecarboxylic acid	3.86	319.081	234.9	C16H18O8	NEG	1.64953e+07
5-Hydroxyhexanoic acid	3.86	131.071	228.1	C6H12O3	NEG	2.23355e+07
(Z)-9,12,13-trihydroxyoctadec-15-enoic acid	3.86	329.232	132.9	C18H34O5	NEG	5.04602e+07
Anthranilic acid (Vitamin L1)	3.86	136.04	83.6	C7H7NO2	NEG	2.75722e+06
Indole-3-carboxylic acid	3.86	160.04	69.9	C9H7NO2	NEG	5.46821e+07
Britanin	3.86	347.149	52.7	C19H26O7	NEG	1.04912e+07
8-hydroxy-3-methyl-isochroman-1-one	3.86	177.055	44.1	C10H10O3	NEG	9.39944e+07
3-(carboxymethyl)benzoic acid	3.85	179.034	261.5	C9H8O4	NEG	3.41128e+09
(10Z,13Z)-15,16-dihydroxyoctadeca-10,13-dienoic acid	3.85	313.236	431.3	C18H32O4	POS	4.38323e+07
Praeruptorin A	3.85	369.132	411.7	C21H22O7	POS	3.33821e+07
Piperine	3.85	286.142	405.5	C17H19NO3	POS	2.03117e+07
7-ethoxy-4-methyl-chromen-2-one	3.85	205.085	370.6	C12H12O3	POS	8.92171e+07
(±)-Naringenin	3.85	273.075	354.5	C15H12O5	POS	2.67797e+07
[(2S,3R,4S,5S,6R)-3,4,5-trihydroxy-6-(hydroxymethyl)tetrahydropyran-2-yl] (E)-3-phenylprop-2-enoate	3.85	311.111	271.9	C15H18O7	POS	1.97405e+08
(3,4-dihydroxyphenyl)-(2,4,6-trihydroxyphenyl)methanone	3.85	245.042	233.8	C13H10O6	POS	2.29228e+07
Nipecotic acid	3.85	130.085	45.8	C6H11NO2	POS	9.46148e+06
10-Hydroxydecanoic acid	3.85	187.133	353.9	C10H20O3	NEG	2.09768e+08
[(3S,4R,8R,9E)-10-methyl-5-methylene-6,14-dioxo-7,13-dioxatricyclo[10.2.1.04,8]pentadeca-1(15),9-dien-3-yl] 2-methylprop-2-enoate	3.85	343.117	351	C19H20O6	NEG	1.90287e+08
(E)-3-(4-hydroxyphenyl)-N-[3-[[(E)-3-(4-hydroxyphenyl)prop-2-enoyl]-[4-[[(E)-3-(4-hydroxyphenyl)prop-2-enoyl]-[3-[[(E)-3-(4-hydroxyphenyl)prop-2-enoyl]amino]propyl]amino]butyl]amino]propyl]prop-2-enamide	3.85	785.353	349.8	C46H50N4O8	NEG	3.68374e+07
Helicin	3.85	283.082	233.5	C13H16O7	NEG	3.31715e+07
1,7-Dimethylxanthine	3.85	179.056	210.5	C7H8N4O2	NEG	4.95951e+07
3-Hydroxyvaleric acid	3.85	117.055	156.6	C5H10O3	NEG	3.77444e+07
5-hydroxy-2-(4-hydroxyphenyl)-6,7,8-trimethoxy-chromen-4-one	3.85	345.095	29.2	C18H16O7	POS	3.51445e+07
5-Hydroxyindole-3-acetic acid	3.85	190.05	220.3	C10H9NO3	NEG	6.76004e+06
5,6,7-trihydroxy-2-(4-methoxyphenyl)chromen-4-one	3.85	299.055	34.2	C16H12O6	NEG	2.40623e+08
Sph(t18:0)	3.85	318.299	153.3	C18H39NO3	POS	4.60856e+06
(+)-Afzelechin	3.85	275.09	52.5	C15H14O5	POS	4.89466e+07
Securinine	3.85	218.117	49.6	C13H15NO2	POS	3.6523e+07
Tropicamide	3.85	285.158	47.1	C17H20N2O2	POS	1.19869e+06
Mono(2-ethylhexyl) phthalate	3.85	279.158	33	C16H22O4	POS	2.76422e+07
Phthalide	3.85	135.043	22.7	C8H6O2	POS	7.84939e+06
L-Arginine	3.85	175.118	520.7	C6H14N4O2	POS	1.35961e+06
(2R,3R,4S,5S,6R)-2-[(E)-4,7-dihydroxy-3,7-dimethyl-oct-2-enoxy]-6-(hydroxymethyl)tetrahydropyran-3,4,5-triol	3.85	349.185	250.7	C16H30O8	NEG	1.3586e+07
2-(1,5,8-trihydroxy-4a,8-dimethyl-1,2,3,4,5,6,7,8a-octahydronaphthalen-2-yl)prop-2-enoic acid	3.85	283.154	200.6	C15H24O5	NEG	8.171e+06
2-Methylbutyrylglycine	3.85	158.082	194	C7H13NO3	NEG	1.58911e+07
Ferulate	3.85	193.05	149	C10H10O4	NEG	3.46055e+08
gamma-CEHC (gamma-Carboxyethyl hydrochroman)	3.85	263.128	75.1	C15H20O4	NEG	8.84098e+07
3-(2,3-dihydroxypropyl)-6,8-dihydroxy-isochromen-1-one	3.85	251.055	47.8	C12H12O6	NEG	2.08248e+08
6-[(E)-2-(3,4-dihydroxyphenyl)vinyl]-4-methoxy-pyran-2-one	3.85	259.06	33.2	C14H12O5	NEG	7.061e+07
methyl 3,8-dihydroxy-9-oxo-xanthene-1-carboxylate	3.85	285.039	24.8	C15H10O6	NEG	1.23355e+08
[2-(hydroxymethyl)-3-methoxy-4-methyl-5-(3-methylbut-2-enoxy)phenyl]methanol	3.85	265.147	23.4	C15H22O4	NEG	9.99994e+08
10,11-dihydroxy-9-(hydroxymethyl)-1,2,6a,6b,9,12a-hexamethyl-2,3,4,5,6,6a,7,8,8a,10,11,12,13,14b-tetradecahydro-1H-picene-4a-carboxylic acid	3.84	487.342	447	C30H48O5	NEG	5.50458e+07
5-[(E)-4-carboxy-3-methyl-but-3-enyl]-3-hydroxy-1,4a-dimethyl-6-methylene-decalin-1-carboxylic acid	3.84	349.201	396.9	C20H30O5	NEG	4.76143e+07
2-isopropenyl-5-methoxy-2,3-dihydropyrano[2,3-g][1,4]benzodioxin-7-one	3.84	275.09	362.9	C15H14O5	POS	9.79714e+07
8-Azaguanine	3.84	153.051	103.5	C4H4N6O	POS	3.24223e+06
Medicagenic acid	3.84	501.321	473.1	C30H46O6	NEG	1.09113e+07
Isoliquiritigenin	3.84	255.065	374.6	C15H12O4	NEG	1.61752e+07
Indole-3-carboxaldehyde	3.84	144.045	311.5	C9H7NO	NEG	3.27336e+07
Taxifolin	3.84	303.05	294.6	C15H12O7	NEG	3.42215e+07
Methyl caffeate	3.84	193.05	294	C10H10O4	NEG	6.63493e+08
Rutin	3.84	609.144	290.1	C27H30O16	NEG	3.17468e+06
(2S,3R,4S,5S,6R)-2-[3-hydroxy-5-[(E)-2-(4-hydroxy-3-methoxy-phenyl)vinyl]phenoxy]-6-(hydroxymethyl)tetrahydropyran-3,4,5-triol	3.84	419.133	267.4	C21H24O9	NEG	3.46328e+07
4-Methyldaphnetin	3.84	191.034	265.3	C10H8O4	NEG	2.40239e+08
Idramantone	3.84	165.091	251.1	C10H14O2	NEG	4.86584e+07
3,5-dimethoxy-4-[(2S,3R,4S,5S,6R)-3,4,5-trihydroxy-6-(hydroxymethyl)tetrahydropyran-2-yl]oxy-benzoic acid	3.84	341.087	207.8	C15H20O10	NEG	7.30849e+07
Arachidic acid	3.84	311.294	604	C20H40O2	NEG	1.51036e+07
2-Ethylbutyric acid	3.84	115.076	62.9	C6H12O2	NEG	1.59179e+07
beta-Guanidinopropionic acid	3.84	132.076	357	C4H9N3O2	POS	297015
2-Pyrimidinylacetic acid	3.84	139.05	296.7	C6H6N2O2	POS	2.24552e+06
3,6-Dihydroxyflavone	3.84	255.064	35.5	C15H10O4	POS	1.20175e+08
4-methoxy-6-[(E)-prop-1-enyl]pyran-2-one	3.84	167.069	34.7	C9H10O3	POS	1.08933e+08
Cacticin	3.84	479.116	168.3	C22H22O12	POS	2.17365e+07
Isorhamnetin-3-O-glucoside	3.84	479.116	168.3	C22H22O12	POS	2.17365e+07
N-methyl-N-[(7S)-1,2,3,10-tetramethoxy-9-oxo-6,7-dihydro-5H-benzo[a]heptalen-7-yl]acetamide	3.84	414.19	48.3	C23H27NO6	POS	4.18623e+07
Kusunokinin	3.84	371.147	32.7	C21H22O6	POS	7.57654e+07
2-Methylhippuric acid	3.84	192.066	191.9	C10H11NO3	NEG	5.09134e+07
Pyrrole-2-carboxylic acid	3.84	110.024	179.4	C5H5NO2	NEG	9.06384e+06
(2R,3S,4S,5R,6S)-2-(hydroxymethyl)-6-[4-[(E)-3-hydroxyprop-1-enyl]phenoxy]tetrahydropyran-3,4,5-triol	3.84	311.113	148.9	C15H20O7	NEG	1.37387e+08
3-Methoxytyrosine	3.84	210.076	37.6	C10H13NO4	NEG	2.92843e+06
5,7-dihydroxy-4-(4-methoxyphenyl)chroman-2-one	3.84	285.076	31.2	C16H14O5	NEG	1.4986e+08
6-[(2E)-3,7-dimethylocta-2,6-dienyl]-7-hydroxy-chromen-2-one	3.84	297.151	26	C19H22O3	NEG	5.46362e+08
Choerospondin	3.83	415.103	287.9	C21H22O10	NEG	5.57121e+07
Ketoleucine	3.83	129.055	263.1	C6H10O3	NEG	3.34564e+06
8-hydroxy-4-(1-hydroxy-1-methyl-ethyl)-10-oxatricyclo[7.2.1.01,5]dodec-3-ene-8-carboxylic acid	3.83	281.138	262.6	C15H22O5	NEG	4.01986e+07
4,7-dihydroxychromen-2-one	3.83	179.033	256.6	C9H6O4	POS	2.34483e+07
8-[3-oxo-2-[(E)-pent-2-enyl]cyclopenten-1-yl]octanoic acid	3.83	293.21	429.6	C18H28O3	POS	3.5155e+07
Sph(d18:2)	3.83	298.273	422.3	C18H35NO2	POS	596618
3,5,7-trimethoxy-2-(4-methoxyphenyl)chromen-4-one	3.83	343.116	385.8	C19H18O6	POS	2.52016e+07
N-Phenylacetamide	3.83	136.075	247.3	C8H9NO	POS	1.03764e+08
1-(2,6-dihydroxyphenyl)-9-phenyl-nonan-1-one	3.83	325.183	541.5	C21H26O3	NEG	9.62957e+08
2-Methylcaproic acid	3.83	129.092	396.7	C7H14O2	NEG	3.07831e+06
7,3',4'-Trihydroxyflavone	3.83	269.045	337.6	C15H10O5	NEG	3.49036e+06
2-(1-carboxyethyl)-5-methyl-cyclopentanecarboxylic acid	3.83	199.097	307.5	C10H16O4	NEG	1.94439e+08
[3-hydroxy-4-[(2S,3R,4S,5S,6R)-3,4,5-trihydroxy-6-(hydroxymethyl)tetrahydropyran-2-yl]oxy-phenyl]methyl 3,4-dihydroxybenzoate	3.83	419.097	283.4	C20H22O11	NEG	2.51498e+07
Salicyluric acid	3.83	194.045	267	C9H9NO4	NEG	2.94643e+07
2-(5-hydroxyhexyl)-3-methylene-butanedioic acid	3.83	229.107	261	C11H18O5	NEG	4.30088e+06
2-hydroxy-3,4-dimethoxy-benzoic acid	3.83	197.045	255.2	C9H10O5	NEG	3.15815e+08
4-Oxohexanoic acid	3.83	129.055	215.1	C6H10O3	NEG	8.48221e+07
Pyrrole-2-carboxaldehyde	3.83	94.0295	199.3	C5H5NO	NEG	1.35387e+07
Mandelic acid	3.83	151.039	92.1	C8H8O3	NEG	4.71903e+08
(E)-2-(3,5-dihydroxy-4,4,10,13-tetramethyl-2,3,6,7,11,12,14,15,16,17-decahydro-1H-cyclopenta[a]phenanthren-17-yl)-6-hydroxy-5,6-dimethyl-hept-4-en-3-one	3.83	453.336	29.2	C30H48O4	NEG	1.56904e+08
5-Hydroxy-3,7,4'-trimethoxyflavone	3.83	329.101	32.6	C18H16O6	POS	5.04191e+07
(-)-Epiafzelechin	3.83	275.09	52.5	C15H14O5	POS	4.89466e+07
8-[(2E)-3,7-dimethylocta-2,6-dienyl]-7-hydroxy-chromen-2-one	3.83	297.151	26	C19H22O3	NEG	5.46362e+08
Phenylacetylglutamine	3.83	265.117	236.2	C13H16N2O4	POS	2.07572e+06
Lauramine oxide	3.83	230.247	143.6	C14H31NO	POS	2.673e+07
2'-O-Methyladenosine	3.83	282.118	90.6	C11H15N5O4	POS	1.23165e+07
5-butyl-4-methoxy-6-methyl-pyran-2-one	3.83	197.116	38.9	C11H16O3	POS	1.35196e+07
Fomepizole	3.83	83.06	28.2	C4H6N2	POS	2.20122e+06
4-Ketopimelic acid	3.83	173.045	389.5	C7H10O5	NEG	720867
Formylanthranilic acid	3.83	164.035	56	C8H7NO3	NEG	3.28619e+07
5,7-Dihydroxy-4-methylcoumarin	3.83	173.024	55.8	C10H8O4	NEG	3.07512e+08
3-Methyl-2-oxovaleric acid	3.83	129.055	54.7	C6H10O3	NEG	1.54681e+08
cis-​9,​10-​Epoxystearic acid	3.83	297.242	48.2	C18H34O3	NEG	6.54131e+07
9-Oxooctadecanoic acid	3.83	297.242	48.2	C18H34O3	NEG	6.54131e+07
3-Methylglutaric acid	3.82	145.05	211	C6H10O4	NEG	1.2424e+08
5,7-Dihydroxycoumarin	3.82	179.033	256.6	C9H6O4	POS	2.34483e+07
(E)-6-hydroxyoctadec-4-enoic acid	3.82	297.242	488.2	C18H34O3	NEG	4.08554e+08
N-Lauroylglycine	3.82	258.205	474.2	C14H27NO3	POS	2.93097e+06
Theophylline	3.82	181.071	215.5	C7H8N4O2	POS	1.40072e+08
2-Piperidone	3.82	100.075	117	C5H9NO	POS	1.07248e+07
methyl (E)-8-(4-hydroxy-6-methoxy-7-methyl-3-oxo-1H-2-benzofuran-5-yl)-2,6-dimethyloct-6-enoate	3.82	375.183	438	C21H28O6	NEG	8.01413e+06
7-hydroxy-3-(hydroxymethyl)-5-methyl-isochromen-1-one	3.82	205.05	263.5	C11H10O4	NEG	5.35369e+07
2-[(2S,3Z,4S)-3-ethylidene-5-methoxycarbonyl-2-[(2S,3R,4S,5S,6R)-3,4,5-trihydroxy-6-(hydroxymethyl)tetrahydropyran-2-yl]oxy-4H-pyran-4-yl]acetic acid	3.82	403.123	249	C17H24O11	NEG	2.60146e+07
Butanoic acid	3.82	87.0448	211.9	C4H8O2	NEG	2.10676e+07
2-Hydroxy-3-methylbutyric acid	3.82	117.055	147.5	C5H10O3	NEG	4.94309e+07
Metyrapone	3.82	227.117	36.2	C14H14N2O	POS	5.23063e+07
3-Hydroxypyruvic acid	3.82	103.003	389.7	C3H4O4	NEG	2.84711e+06
cis-Jasmone	3.82	165.127	40.1	C11H16O	POS	6.37825e+06
Isoxsuprine hydrochloride	3.82	284.163	33.1	C18H23NO3	POS	1.88197e+07
15-(1,3-dihydroxy-3-methyl-butyl)-18-hydroxy-2-methoxy-7,9,13-trioxapentacyclo[10.8.0.03,10.04,8.014,19]icosa-1,3(10),5,11,14,16,18-heptaen-20-one	3.82	427.137	30	C23H22O8	POS	7.10388e+06
Dodecenedioylcarnitine (Car(12:1-O2))	3.82	372.236	324	C19H33NO6	POS	441539
(E)-9,12,13-trihydroxyoctadec-10-enoic acid	3.82	329.232	149.2	C18H34O5	NEG	1.41509e+08
5,7-dihydroxy-2-sec-butyl-8-[3,4,5-trihydroxy-6-(hydroxymethyl)tetrahydropyran-2-yl]chromen-4-one	3.82	395.133	106.6	C19H24O9	NEG	9.15251e+08
Embelin	3.82	293.178	44.5	C17H26O4	NEG	1.6496e+07
1,10-dihydroxy-9-(hydroxymethyl)-1,2,6a,6b,9,12a-hexamethyl-2,3,4,5,6,6a,7,8,8a,10,11,12,13,14b-tetradecahydropicene-4a-carboxylic acid	3.81	487.342	447	C30H48O5	NEG	5.50458e+07
Noreugenin	3.81	191.034	333.8	C10H8O4	NEG	4.06963e+07
Scopolin	3.81	353.086	234.9	C16H18O9	NEG	2.21921e+08
2,4,8,9-tetrahydroxybenzofuro[3,2-c]chromen-6-one	3.81	299.019	317	C15H8O7	NEG	5.57077e+07
Kaempferol 3-neohesperidoside	3.81	593.149	294.4	C27H30O15	NEG	5.29175e+06
4-(3,4-dihydroxyphenyl)-7-hydroxy-5-[(2S,3R,4S,5S,6R)-3,4,5-trihydroxy-6-(hydroxymethyl)tetrahydropyran-2-yl]oxy-chromen-2-one	3.81	447.092	270.4	C21H20O11	NEG	4.22296e+07
Phytanic acid	3.81	311.294	604	C20H40O2	NEG	1.51036e+07
(1R,7R,10R)-4,10,11,11-tetramethyltricyclo[5.3.1.01,5]undec-4-en-3-one	3.81	219.173	460.1	C15H22O	POS	8.994e+06
Methyl 2-(3-oxo-2-(pent-2-en-1-yl)cyclopentyl)acetate	3.81	225.147	396.6	C13H20O3	POS	2.03398e+07
6-[2-(1,3-benzodioxol-5-yl)ethyl]-4-methoxy-pyran-2-one	3.81	257.08	372.9	C15H14O5	POS	2.07709e+08
10-methoxy-2,2-dimethyl-pyrano[3,2-g]chromen-8-one	3.81	259.095	358.7	C15H14O4	POS	9.57163e+07
Caprolactam	3.81	114.091	216.1	C6H11NO	POS	4.90434e+06
HTMF	3.81	357.097	355.4	C19H18O7	NEG	2.89372e+07
3-(3-hydroxy-5-methyl-phenoxy)-5-methyl-benzene-1,2-diol	3.81	245.081	348.1	C14H14O4	NEG	1.75428e+07
(E)-3,4-Dimethoxycinnamic acid	3.81	207.065	318.3	C11H12O4	NEG	1.97352e+09
(1S,3R,4R,5R)-1,3,4-trihydroxy-5-[(E)-3-(3-hydroxy-4-methoxy-phenyl)prop-2-enoyl]oxy-cyclohexanecarboxylic acid	3.81	367.102	264.2	C17H20O9	NEG	3.22219e+07
(12Z,15Z)-10-hydroxyoctadeca-12,15-dienoic acid	3.81	295.227	47.9	C18H32O3	NEG	3.26649e+07
Ethylvanillin	3.81	167.069	34.7	C9H10O3	POS	1.08933e+08
Homogentisic acid	3.81	167.034	163.7	C8H8O4	NEG	1.45593e+08
(E,9S,12S,13S)-9,12,13-trihydroxyoctadec-10-enoic acid	3.81	329.232	132.9	C18H34O5	NEG	5.04602e+07
3'-O-Methyladenosine	3.81	282.118	90.6	C11H15N5O4	POS	1.23165e+07
Alminoprofen	3.81	220.132	53	C13H17NO2	POS	1.82341e+06
Harmine	3.81	213.101	36.2	C13H12N2O	POS	1.21309e+09
1-[4-(5-allyl-2-hydroxy-phenoxy)phenyl]propan-1-one	3.81	283.132	31.2	C18H18O3	POS	3.52864e+07
Azaleatin	3.81	317.064	25.3	C16H12O7	POS	6.11089e+06
N-Acetylphenylalanine	3.81	206.081	184	C11H13NO3	NEG	1.75697e+08
4-(4-hydroxy-6-methoxy-7-methyl-3-oxo-1H-isobenzofuran-5-yl)-2-methyl-butanoic acid	3.81	293.102	49.9	C15H18O6	NEG	3.4692e+07
2,6-dihydroxy-7-methoxy-1,1,4a-trimethyl-3,4,10,10a-tetrahydro-2H-phenanthren-9-one	3.81	303.159	49.6	C18H24O4	NEG	6.66013e+06
Pristanic acid	3.8	297.279	593.5	C19H38O2	NEG	862086
Theobromine	3.8	179.056	210.5	C7H8N4O2	NEG	4.95951e+07
(2S)-2-benzamido-3-phenyl-propanoic acid	3.8	268.097	357.1	C16H15NO3	NEG	1.98561e+07
(4E,7E)-dodeca-4,7-dienedioic acid	3.8	225.113	366.8	C12H18O4	NEG	7.91734e+07
Butyllactate	3.8	145.087	329.6	C7H14O3	NEG	2.30341e+07
2-[(2-hydroxy-3-methyl-butanoyl)amino]-3-methyl-butanoic acid	3.8	216.123	293.5	C10H19NO4	NEG	3.85258e+06
Pyroglutamic acid	3.8	128.035	51.9	C5H7NO3	NEG	3.20607e+06
1-(1H-indol-3-yl)ethanone	3.8	160.075	41.3	C10H9NO	POS	3.43289e+07
2-Methoxybenzoic-acid	3.8	153.054	135.3	C8H8O3	POS	1.3379e+07
Tetradecenedioylcarnitine (Car(14:1-O2))	3.8	400.268	323.9	C21H37NO6	POS	30067.4
Mannose	3.8	161.045	297	C6H12O6	NEG	5.28124e+06
3-Aminosalicylic acid	3.8	152.035	32.4	C7H7NO3	NEG	2.5605e+07
(Z)-6,9,10-trihydroxyoctadec-7-enoic acid	3.79	329.232	402.7	C18H34O5	NEG	4.45527e+07
Itaconic acid	3.79	129.019	96.2	C5H6O4	NEG	2.73896e+06
Liquiritin	3.79	417.118	298.6	C21H22O9	NEG	5.52472e+07
1-[2,4-dihydroxy-6-[(2S,3R,4S,5S,6R)-3,4,5-trihydroxy-6-(hydroxymethyl)tetrahydropyran-2-yl]oxy-phenyl]ethanone	3.79	311.076	226.8	C14H18O9	NEG	3.11811e+07
(3R)-8-hydroxy-3-(4-hydroxyphenyl)isochroman-1-one	3.79	255.065	374.6	C15H12O4	NEG	1.61752e+07
2-Phenylacetamide	3.79	136.075	247.3	C8H9NO	POS	1.03764e+08
2-(6-hydroxyhexyl)-3-methylene-butanedioic acid	3.79	229.107	261	C11H18O5	NEG	4.30088e+06
LY294002	3.79	308.127	353.5	C19H17NO3	POS	4.60267e+07
4-methyl-6-phenyl-pyran-2-one	3.79	187.074	337.7	C12H10O2	POS	8.32253e+07
(6aR,12aR)-12a-hydroxy-2,3,9-trimethoxy-6,6a-dihydrochromeno[3,4-b]chromen-12-one	3.79	359.11	329.2	C19H18O7	POS	5.18288e+07
7,8-dimethoxychromen-2-one	3.79	207.064	294.9	C11H10O4	POS	2.67883e+08
Veratraldehyde	3.79	167.069	294	C9H10O3	POS	1.8223e+08
(6S,7aR)-6-hydroxy-4,4,7a-trimethyl-6,7-dihydro-5H-benzofuran-2-one	3.79	179.106	263.3	C11H16O3	POS	1.05721e+08
beta-Chamigrenic acid	3.79	233.154	457.4	C15H22O2	NEG	1.55994e+07
(Z)-2-octylpent-2-enedioic acid	3.79	241.144	451.7	C13H22O4	NEG	1.4259e+07
(Z)-6-methyl-2-(4-methylpent-3-enyl)hept-2-enedioic acid	3.79	253.144	398.8	C14H22O4	NEG	1.25709e+07
(E)-2,7-dimethyl-8-[(2R,3R,4S,5S,6R)-3,4,5-trihydroxy-6-(hydroxymethyl)oxan-2-yl]oxydec-4-enedioic acid	3.79	405.175	300.9	C18H30O10	NEG	1.03125e+07
Magnolioside	3.79	353.087	247.3	C16H18O9	NEG	9.73433e+07
Vanillylmandelic acid	3.79	197.044	98.7	C9H10O5	NEG	4.80408e+07
(1R,8S,16S,17S)-12-methoxy-5-oxido-15-aza-5-azoniahexacyclo[13.4.2.01,16.05,16.08,17.09,14]henicosa-2,9(14),10,12-tetraen-21-one	3.79	339.169	223.6	C20H22N2O3	POS	1.8813e+06
4-methoxy-7-[[(2R,3R,4S,5S,6R)-3,4,5-trihydroxy-6-(hydroxymethyl)tetrahydropyran-2-yl]oxymethyl]furo[3,2-g]chromen-5-one	3.79	409.111	208.4	C19H20O10	POS	3.83225e+06
Ketotifen (fumarate)	3.79	310.127	58.8	C19H19NOS	POS	2.70909e+08
Succinate	3.79	117.019	392.1	C4H6O4	NEG	5.14753e+06
(2S,4aS,6aS,6bR,10S,12aS,14bS)-10-hydroxy-2,4a,6a,6b,9,9,12a-heptamethyl-13-oxo-3,4,5,6,6a,7,8,8a,10,11,12,14b-dodecahydro-1H-picene-2-carboxylic acid	3.78	469.331	507.6	C30H46O4	NEG	1.06847e+07
(2R,3R)-3-hydroxy-5,7-dimethoxy-2-(4-methoxyphenyl)chroman-4-one	3.78	331.116	348.5	C18H18O6	POS	7.95761e+07
(4aS,6aR,6aS,6bR,8aR,10S,12aR,14bS)-10-hydroxy-1,2,6a,6b,9,9,12a-heptamethyl-4,5,6,6a,7,8,8a,10,11,12,13,14b-dodecahydro-3H-picene-4a-carboxylic acid	3.78	453.336	539.9	C30H46O3	NEG	2.31368e+07
3,12-dihydroxy-4,6a,6b,11,12,14b-hexamethyl-1,2,3,4a,5,6,7,8,9,10,11,12a,14,14a-tetradecahydropicene-4,8a-dicarboxylic acid	3.78	501.321	407	C30H46O6	NEG	5.49524e+06
(4aR,6aS,9aR)-1,8,8-trimethyl-2-oxo-1,4,4a,6a,7,9-hexahydropentaleno[1,6a-c]pyran-5-carboxylic acid	3.78	263.128	352.4	C15H20O4	NEG	3.09308e+06
Zearalanone	3.78	319.154	351.4	C18H24O5	NEG	5.45056e+06
2-[(1R,2R)-3-oxo-2-[(Z)-5-[3,4,5-trihydroxy-6-(hydroxymethyl)tetrahydropyran-2-yl]oxypent-2-enyl]cyclopentyl]acetic acid	3.78	387.165	248.5	C18H28O9	NEG	1.38299e+07
D-Mannoheptulose	3.78	191.056	341.4	C7H14O7	NEG	5.08761e+06
2-Ethyl-2-hydroxybutyric acid	3.78	131.071	120.5	C6H12O3	NEG	1.83803e+07
(1S,8R,9R)-8-hydroxy-4-isopropylidene-10-oxatricyclo[7.2.1.01,5]dodecane-8-carboxylic acid	3.78	265.147	23.4	C15H22O4	NEG	9.99994e+08
2-(3,4-dihydroxyphenyl)-5-hydroxy-7-methoxy-3-[(2S,3R,4S,5S,6R)-3,4,5-trihydroxy-6-[[(2R,3R,4R,5R,6S)-3,4,5-trihydroxy-6-methyl-tetrahydropyran-2-yl]oxymethyl]tetrahydropyran-2-yl]oxy-chromen-4-one	3.78	625.174	248	C28H32O16	POS	2.97647e+06
2,2-dimethyl-6H-pyrano[3,2-c]quinolin-5-one	3.78	228.101	54.7	C14H13NO2	POS	3.17634e+07
Actarit	3.78	192.066	209.7	C10H11NO3	NEG	8.0841e+06
Piperonylic acid	3.78	165.019	115.2	C8H6O4	NEG	5.18824e+08
(2R)-7-hydroxy-8-(2-hydroxyethyl)-5-methoxy-2-methyl-chroman-4-one	3.78	251.091	51.6	C13H16O5	NEG	6.9929e+07
4-Methyl-3-nitrobenzoic acid	3.78	180.029	45.8	C8H7NO4	NEG	2.26506e+07
2-Aminonicotinic acid	3.77	139.049	47.7	C6H6N2O2	POS	1.70558e+06
3,5-Dihydroxybenzoic acid	3.77	153.019	206.8	C7H6O4	NEG	1.89062e+08
α-Cyperone	3.77	219.173	460.1	C15H22O	POS	8.994e+06
Dibutyl sebacate	3.77	315.251	522.2	C18H34O4	POS	1.35776e+07
Betamipron	3.77	194.08	258.4	C10H11NO3	POS	2.09666e+07
(1R,4aR,4bS,6aS,9R,10R,10aS)-1-(carboxymethyl)-2-(1-carboxy-1-methyl-ethyl)-10-hydroxy-1,4a,4b,9,10-pentamethyl-3,4,5,6,7,8,9,10a,12,12a-decahydro-2H-chrysene-6a-carboxylic acid	3.77	517.316	453.4	C30H46O7	NEG	1.34681e+06
3,4-Dimethylbenzoic acid	3.77	149.06	386	C9H10O2	NEG	5.09058e+07
(3R,4R,6aR,6bS,8aS,14bR)-8a-[6-[[3,4-dihydroxy-6-(hydroxymethyl)-5-[(2S,3R,4R,5R,6S)-3,4,5-trihydroxy-6-methyl-tetrahydropyran-2-yl]oxy-tetrahydropyran-2-yl]oxymethyl]-3,4,5-trihydroxy-tetrahydropyran-2-yl]oxycarbonyl-3-hydroxy-4,6a,6b,11,11,14b-hexamethyl-1,2,3,4a,5,6,7,8,9,10,12,12a,14,14a-tetradecahydropicene-4-carboxylic acid	3.77	955.488	380.2	C48H76O19	NEG	598392
Monobutyl phthalate	3.77	221.081	379	C12H14O4	NEG	3.40609e+07
5,7-dihydroxy-2-(4-hydroxy-3-methoxy-phenyl)chroman-4-one	3.77	301.07	354.1	C16H14O6	NEG	6.92906e+07
(E)-3,10-dihydroxy-4,9-dimethyl-dodec-6-enedioic acid	3.77	287.149	311.1	C14H24O6	NEG	5.47879e+07
(E)-3-[4-methoxy-2-[(2S,3R,4S,5S,6R)-3,4,5-trihydroxy-6-(hydroxymethyl)tetrahydropyran-2-yl]oxy-phenyl]prop-2-enoic acid	3.77	355.102	250.6	C16H20O9	NEG	9.48831e+07
[(3S,4R,5S)-5-[(2S,3R,4S,5S,6R)-4,5-dihydroxy-6-(hydroxymethyl)-2-(4-hydroxyphenoxy)tetrahydropyran-3-yl]oxy-3,4-dihydroxy-tetrahydrofuran-3-yl]methyl 4-hydroxybenzoate	3.77	523.144	222.9	C24H28O13	NEG	3.81238e+07
3,4-Dihydroxyphenylglycol	3.77	169.05	94	C8H10O4	NEG	4.96027e+06
3-Aminobutanoic acid	3.77	104.07	380.3	C4H9NO2	POS	5.9175e+06
Paederosidic acid	3.77	463.088	307	C18H24O12S	NEG	1.35536e+06
17-[5-hydroxy-6-(1-hydroxy-1-methyl-ethyl)tetrahydropyran-3-yl]-4,4,10,13,14-pentamethyl-1,2,5,6,9,11,12,15,16,17-decahydrocyclopenta[a]phenanthren-3-one	3.76	471.348	491.8	C30H48O4	NEG	1.02615e+08
1,3,5-trihydroxy-4-[(E)-3-(3-hydroxy-4-methoxy-phenyl)prop-2-enoyl]oxy-cyclohexanecarboxylic acid	3.76	367.102	264.2	C17H20O9	NEG	3.22219e+07
4-[(3-acetyl-2,6-dihydroxy-5-methyl-phenyl)methyl]-3-hydroxy-2-methyl-2H-furan-5-one	3.76	291.087	329.3	C15H16O6	NEG	1.24431e+08
Mosloflavone	3.76	281.077	406.4	C17H14O5	POS	2.16279e+07
[6-hydroxy-7-methyl-8-oxo-3-[(E)-prop-1-enyl]-5,6-dihydro-1H-isochromen-7-yl] 4-hydroxy-2-methoxy-6-methyl-benzoate	3.76	383.147	391	C22H24O7	POS	2.10964e+07
Hesperetin	3.76	303.085	361.8	C16H14O6	POS	4.42861e+07
5,7-dihydroxy-2-methoxy-chromen-4-one	3.76	209.043	286.3	C10H8O5	POS	1.51696e+08
Homoveratric acid	3.76	179.069	277.5	C10H12O4	POS	9.71058e+07
Hexenoylcarnitine (Car(6:1))	3.76	240.158	225.6	C13H23NO4	POS	1.95652e+07
7-[(E)-3-methyl-5-[(1R,2R,4R)-1,3,3-trimethyl-7-oxabicyclo[2.2.1]heptan-2-yl]pent-2-enoxy]chromen-2-one	3.76	381.205	483.3	C24H30O4	NEG	3.2122e+07
(2S,3S,4S,5R,6R)-6-[[(3S,6aR,6bS,8aS,14bR)-8a-carboxy-4-(hydroxymethyl)-4,6a,6b,11,11,14b-hexamethyl-1,2,3,4a,5,6,7,8,9,10,12,12a,14,14a-tetradecahydropicen-3-yl]oxy]-3,4,5-trihydroxy-tetrahydropyran-2-carboxylic acid	3.76	647.378	434.1	C36H56O10	NEG	55546.6
7-[(2S,3R,4S,5S,6R)-4,5-dihydroxy-6-(hydroxymethyl)-3-[(2S,3R,4R,5R,6S)-3,4,5-trihydroxy-6-methyl-tetrahydropyran-2-yl]oxy-tetrahydropyran-2-yl]oxy-3,5-dihydroxy-2-(4-hydroxyphenyl)chromen-4-one	3.76	595.163	248.5	C27H30O15	POS	699756
3-[4,5-dihydroxy-6-(hydroxymethyl)-3-[(2S,3R,4R,5R,6S)-3,4,5-trihydroxy-6-methyl-tetrahydropyran-2-yl]oxy-tetrahydropyran-2-yl]oxy-5,7-dihydroxy-2-(4-hydroxyphenyl)chromen-4-one	3.76	595.163	248.5	C27H30O15	POS	699756
3,3-Dimethylglutaric acid	3.76	159.066	62.4	C7H12O4	NEG	7.8986e+07
1-Methyl-6-phenyl-1H-imidazo[4,5-b]pyridin-2-amine	3.76	223.097	47.5	C13H12N4	NEG	2.16648e+07
methyl 5,6-diacetoxy-10-hydroxy-2,4b,7,7,10a,12a-hexamethyl-12-methylene-1,4,8-trioxo-4a,5,6,6a,9,10,10b,11-octahydronaphtho[1,2-h]isochromene-2-carboxylate	3.76	557.237	47.2	C30H40O11	NEG	7.88596e+06
(3R,4S)-6,8-dihydroxy-3,4,5-trimethyl-1-oxo-isochromane-7-carboxylic acid	3.76	265.07	35.4	C13H14O6	NEG	8.57407e+07
methyl 2-hydroxy-3-[(2S,3R,4S,5S,6R)-3,4,5-trihydroxy-6-(hydroxymethyl)tetrahydropyran-2-yl]oxy-benzoate	3.75	311.076	226.8	C14H18O9	NEG	3.11811e+07
5-(2-hydroxy-4-methylphenyl)-6-methylheptan-2-one	3.75	235.168	431.3	C15H22O2	POS	1.29128e+07
N-(1-benzyl-2-hydroxy-ethyl)benzamide	3.75	256.132	357.2	C16H17NO2	POS	2.9345e+07
Phytolaccoside A	3.75	647.379	417.6	C36H56O10	NEG	31083.3
(10E,15Z)-9,12,13-trihydroxyoctadeca-10,15-dienoic acid	3.75	327.217	374.5	C18H32O5	NEG	6.7949e+07
Trolox	3.75	249.112	371.1	C14H18O4	NEG	2.3477e+07
Histidine	3.75	154.063	42.5	C6H9N3O2	NEG	3.48786e+06
2-Hydroxy-4-methoxybenzoic acid	3.75	167.034	51.3	C8H8O4	NEG	1.50757e+08
(3aR,5S,7S,8R,8aS,9aR)-7,8-dihydroxy-5,8a-dimethyl-1-methylene-4,5,5a,6,7,8,9,9a-octahydro-3aH-azuleno[6,5-b]furan-2-one	3.75	265.147	23.4	C15H22O4	NEG	9.99994e+08
Glucose	3.75	161.045	323.1	C6H12O6	NEG	7.63078e+06
Normetanephrine	3.75	184.096	228.8	C9H13NO3	POS	8.4728e+06
5-O-Cinnamoylquinic acid	3.75	323.111	158	C16H18O7	POS	2.99763e+07
5-hydroxy-2-(4-hydroxyphenyl)-7-methoxy-chroman-4-one	3.75	287.09	40	C16H14O5	POS	7.56279e+07
3-[(2S,3R,4R,5S,6S)-3,5-dihydroxy-6-methyl-4-[(2S,3R,4S,5S,6R)-3,4,5-trihydroxy-6-(hydroxymethyl)tetrahydropyran-2-yl]oxy-tetrahydropyran-2-yl]oxy-5,7-dihydroxy-2-(4-hydroxyphenyl)chromen-4-one	3.75	593.149	245.5	C27H30O15	NEG	4.08296e+06
(3R,4S)-4,6,8-trihydroxy-7-methoxy-3-methyl-isochroman-1-one	3.75	239.059	28.4	C11H12O6	NEG	1.06335e+08
(2S)-6-(1,1-dimethylallyl)-2-(1-hydroxy-1-methyl-ethyl)-2,3-dihydrofuro[3,2-g]chromen-7-one	3.74	315.158	428.6	C19H22O4	POS	1.84232e+07
Homoeriodictyol	3.74	301.07	354.1	C16H14O6	NEG	6.92906e+07
5,6,7-Trimethoxycoumarin	3.74	237.075	330.6	C12H12O5	POS	6.36611e+07
Caffeine	3.74	195.087	239.1	C8H10N4O2	POS	5.16362e+06
2,6-Dimethoxy-1,4-benzoquinone	3.74	169.049	191.4	C8H8O4	POS	1.37472e+07
4-hydroxy-4-[(E)-3-hydroxybut-1-enyl]-3,5,5-trimethyl-cyclohex-2-en-1-one	3.74	223.133	277.6	C13H20O3	NEG	3.76168e+08
2-methyl-3-[(2S,3R,4S,5S,6R)-3,4,5-trihydroxy-6-(hydroxymethyl)tetrahydropyran-2-yl]oxy-pyran-4-one	3.74	289.09	153.7	C12H16O8	POS	1.12239e+07
Undecenedioylcarnitine (Car(11:1-O2))	3.74	358.221	329.4	C18H31NO6	POS	526321
Quillaic acid	3.73	485.325	477.7	C30H46O5	NEG	1.36587e+07
(1S,3R,4R,5R)-1,3,4-trihydroxy-5-[(E)-3-(4-hydroxy-3-methoxy-phenyl)prop-2-enoyl]oxy-cyclohexanecarboxylic acid	3.73	367.102	264.2	C17H20O9	NEG	3.22219e+07
1,1,9a-trimethyl-3,4,8,9-tetrahydro-2H-benzo[7]annulene-7-carboxylic acid	3.73	233.154	457.4	C15H22O2	NEG	1.55994e+07
3-(1-carboxyvinyloxy)benzoic acid	3.73	209.043	286.3	C10H8O5	POS	1.51696e+08
DEHP	3.73	391.282	562.1	C24H38O4	POS	5.2751e+08
5,10-dimethoxy-2,2-dimethyl-pyrano[3,2-g]chromen-8-one	3.73	289.106	359.4	C16H16O5	POS	4.13276e+07
3-O-Acetylpinobanksin	3.73	313.071	375.3	C17H14O6	NEG	8.8977e+07
(2E)-2-hexylidene-3-methyl-butanedioic acid	3.73	213.113	365.7	C11H18O4	NEG	4.85732e+07
Hydroxytyrosol acetate	3.73	195.065	314	C10H12O4	NEG	1.27526e+09
1-(1,3-benzodioxol-5-yl)propane-1,2,3-triol	3.73	211.06	234.8	C10H12O5	NEG	3.94334e+08
2-Hydroxy-6-methoxybenzoic acid	3.73	149.024	39	C8H8O4	NEG	1.52936e+08
2-[(3S,3aR,5R,7aS)-3a-acetyl-3-hydroxy-7a-methyl-2,3,4,5,6,7-hexahydro-1H-inden-5-yl]prop-2-enoic acid	3.73	265.147	23.4	C15H22O4	NEG	9.99994e+08
14-methyl-7,9,20,22-tetraoxa-14-azapentacyclo[15.7.0.04,12.06,10.019,23]tetracosa-1(24),4,6(10),11,17,19(23)-hexaen-2-one	3.73	354.132	52.5	C20H19NO5	POS	3.75878e+07
Tazarotene	3.73	352.138	51.9	C21H21NO2S	POS	1.0543e+07
dimethyl 4-hydroxybenzene-1,3-dicarboxylate	3.73	209.045	51.3	C10H10O5	NEG	1.46842e+08
Ziprasidone	3.73	411.108	25.9	C21H21ClN4OS	NEG	1.11513e+08
2,10,10-trimethyltricyclo[6.3.0.01,5]undec-6-ene-6-carboxylic acid	3.72	233.154	457.4	C15H22O2	NEG	1.55994e+07
14-hydroxy-16-methoxy-4-methyl-3-oxabicyclo[10.4.0]hexadeca-1(12),13,15-trien-2-one	3.72	291.159	462.9	C17H24O4	NEG	9.03368e+06
1,3,5,6-tetrahydroxy-2-methyl-anthracene-9,10-dione	3.72	285.039	439.1	C15H10O6	NEG	5.34901e+08
Nialamide	3.72	279.123	309.3	C16H18N4O2	NEG	1.03494e+07
Pyruvate	3.72	87.0085	47.9	C3H4O3	NEG	8.15253e+06
3-IsopropoxybenzoicAcid	3.72	179.071	80	C10H12O3	NEG	1.24247e+08
Kaempferol 3-O-beta-sophoroside	3.72	611.158	287.8	C27H30O16	POS	247247
Kaempferol 3-O-sophoroside	3.72	611.158	287.8	C27H30O16	POS	247247
Azasetron (hydrochloride)	3.72	350.122	204.3	C17H20ClN3O3	POS	1.11544e+07
Pilocarpine	3.72	209.127	60.4	C11H16N2O2	POS	6.47529e+06
1-BCP	3.72	234.111	51.2	C13H15NO3	POS	3.3168e+07
6,9a,11a-Trimethyl-4-oxo-1,2,3a,3b,5,5a,7,8,9,9b,10,11-dodecahydronaphtho[1,2-g][1]benzofuran-6-carboxylic acid	3.71	333.206	441.8	C20H30O4	NEG	6.32804e+07
(Z)-5,8,11-trihydroxyoctadec-9-enoic acid	3.71	329.232	402.7	C18H34O5	NEG	4.45527e+07
(E)-5-[(1R,3S,4aS,5S,8aS)-3-hydroxy-1,4a,5-trimethyl-2-methylidene-4,5,6,7,8,8a-hexahydro-3H-naphthalen-1-yl]-3-methylpent-2-enoic acid	3.71	319.227	455.6	C20H32O3	NEG	1.06833e+07
(1S,5S,8S,9R)-2,5,9-trimethyltricyclo[6.3.0.01,5]undec-2-ene-3-carboxylic acid	3.71	233.154	457.4	C15H22O2	NEG	1.55994e+07
Isophorone	3.71	139.111	357.2	C9H14O	POS	1.47488e+07
6,7-dimethoxy-3-(4-methoxyphenyl)chromen-4-one	3.71	313.106	346.7	C18H16O5	POS	1.71771e+08
Entinostat	3.71	359.147	274.7	C21H20N4O3	POS	9.62975e+06
3-Succinoylpyridine	3.71	180.065	230.6	C9H9NO3	POS	3.44205e+07
ethyl 3,5-dihydroxybenzoate	3.71	181.05	275.2	C9H10O4	NEG	4.30892e+07
(9a-methyl-2',3-dioxo-spiro[4,5,5a,7,8,9-hexahydro-1H-benzo[e]isobenzofuran-6,3'-oxetane]-5-yl) acetate	3.71	319.119	230.5	C17H20O6	NEG	3.62152e+06
4-Isopropylbenzoic acid	3.71	163.076	32.9	C10H12O2	NEG	2.69761e+07
5,7-dihydroxy-2-[4-hydroxy-3-[(2S,3R,4S,5S,6R)-3,4,5-trihydroxy-6-(hydroxymethyl)tetrahydropyran-2-yl]oxy-phenyl]-3-methoxy-chromen-4-one	3.71	479.116	168.3	C22H22O12	POS	2.17365e+07
(1R,4R,5R,6R,7R,8R,11R,13S,17S,18S,19R)-4,5,7,8,17-pentahydroxy-14,18-dimethyl-spiro[3,10-dioxapentacyclo[9.8.0.01,7.04,19.013,18]nonadec-14-ene-6,2'-oxirane]-9,16-dione	3.71	407.13	114.2	C20H24O10	POS	1.34115e+08
1,7-bis(4-hydroxyphenyl)heptan-3-one	3.71	279.136	43.1	C19H22O3	NEG	5.79177e+07
(1S,5R,9S,12S)-16-isopropyl-5,9-dimethyl-13,14-dioxatetracyclo[10.2.2.01,10.04,9]hexadec-15-ene-5-carboxylic acid	3.7	333.206	441.8	C20H30O4	NEG	6.32804e+07
Propyl paraben	3.7	179.071	343.6	C10H12O3	NEG	3.03721e+07
2-acetylbenzoic acid	3.7	163.04	228.5	C9H8O3	NEG	2.35897e+07
5-(4-carboxy-3-methyl-butyl)-1,4a-dimethyl-6-methylene-decalin-1-carboxylic acid	3.7	335.222	403	C20H32O4	NEG	3.03717e+06
2,9-dihydroxy-7-methoxy-4-methyl-benzo[g]benzofuran-3-one	3.7	261.075	328.8	C14H12O5	POS	1.45425e+08
7-[(E)-6,7-dihydroxy-3,7-dimethyl-oct-2-enoxy]chromen-2-one	3.7	331.154	394	C19H24O5	NEG	1.58523e+07
3'-​O-​Acetylhamaudol	3.7	299.092	355.6	C17H18O6	NEG	5.43725e+07
4-hydroxy-3',6-dimethoxy-5'-methyl-spiro[benzofuran-2,4'-cyclohex-2-ene]-1',3-dione	3.7	303.086	353.5	C16H16O6	NEG	3.1843e+07
Ecabet (sodium)	3.7	379.16	320.4	C20H28O5S	NEG	2.16609e+07
3-Hydroxyhippuric acid	3.7	194.045	251.3	C9H9NO4	NEG	2.33302e+06
Homovanillic alcohol	3.7	149.06	203.6	C9H12O3	NEG	3.58252e+06
2-Hydroxyisobutyric acid	3.7	103.04	46.9	C4H8O3	NEG	7.9909e+06
2-Hydroxybutyric acid	3.7	103.04	46.9	C4H8O3	NEG	7.9909e+06
6-(6,8-dihydroxy-7-methoxy-3-methyl-1-oxo-isochroman-4-yl)oxy-4,8-dihydroxy-7-methoxy-3-methyl-isochroman-1-one	3.7	463.128	29.5	C22H22O11	POS	9.41368e+06
5-ethyl-6-oxo-4-[2-[(2R,3R,4S,5S,6R)-3,4,5-trihydroxy-6-(hydroxymethyl)oxan-2-yl]oxyethyl]-2,3-dihydropyran-3-carboxylic acid	3.7	357.118	304.8	C16H24O10	NEG	1.56934e+06
methyl (1S,4aR,6S,7R,7aS)-4a,6,7-trihydroxy-7-methyl-1-[(2S,3R,4S,5S,6R)-3,4,5-trihydroxy-6-(hydroxymethyl)tetrahydropyran-2-yl]oxy-1,5,6,7a-tetrahydrocyclopenta[c]pyran-4-carboxylate	3.7	403.123	285.6	C17H26O12	NEG	1.46319e+07
1,11-dihydroxy-1,2,6a,6b,9,9,12a-heptamethyl-10-oxo-3,4,5,6,6a,7,8,8a,11,12,13,14b-dodecahydro-2H-picene-4a-carboxylic acid	3.69	485.325	477.7	C30H46O5	NEG	1.36587e+07
4-Methylesculetin	3.69	191.034	265.3	C10H8O4	NEG	2.40239e+08
(E)-5-(2,3-dimethyl-3-tricyclo[2.2.1.02,6]heptanyl)-2-methyl-pent-2-enoic acid	3.69	233.154	457.4	C15H22O2	NEG	1.55994e+07
5,5,6b-trimethyl-3a,4,6,6a-tetrahydro-1H-cyclopropa[e]indene-1a,2-dicarboxylic acid	3.69	263.128	352.4	C15H20O4	NEG	3.09308e+06
Jaranol	3.69	313.071	375.3	C17H14O6	NEG	8.8977e+07
2-hexyl-3-methylene-butanedioic acid	3.69	213.113	365.7	C11H18O4	NEG	4.85732e+07
(3aR,5S,5aS,9aR)-5,8-dimethyl-1-methylene-4,5,5a,6,9,9a-hexahydro-3aH-azuleno[6,5-b]furan-2,7-dione	3.69	247.131	282	C15H18O3	POS	3.97948e+07
7-ethyl-8-hydroxy-4,7-dimethyl-6-oxo-8H-isochromene-3-carboxylic acid	3.69	265.104	227.1	C14H16O5	POS	2.54145e+07
7-[(2E,6E,10S)-10,11-dihydroxy-3,7,11-trimethyl-dodeca-2,6-dienoxy]chromen-2-one	3.69	399.216	476.7	C24H32O5	NEG	1.9627e+07
5-[2-(3,4-dihydroxy-2,5-dimethoxyoxolan-3-yl)ethyl]-1,4a-dimethyl-6-methylidene-3,4,5,7,8,8a-hexahydro-2H-naphthalene-1-carboxylic acid	3.69	411.237	443.4	C22H36O7	NEG	2.03372e+08
4,4,7a-trimethyl-3a,5,6,7-tetrahydro-3H-indene-1-carboxylic acid	3.69	207.138	420.2	C13H20O2	NEG	647274
Columbin	3.69	357.133	373.7	C20H22O6	NEG	4.07106e+07
[(2S,3R,4S,5S,6R)-3,4,5-trihydroxy-6-(hydroxymethyl)tetrahydropyran-2-yl] (2E,6E)-8-hydroxy-2,6-dimethyl-octa-2,6-dienoate	3.69	345.154	300.1	C16H26O8	NEG	1.71e+08
2,6-dihydroxy-4-(2-hydroxy-1-methyl-propyl)-3-methyl-benzoic acid	3.69	239.092	292.6	C12H16O5	NEG	7.7637e+07
(2S,3R,4S,5S,6R)-2-(3,5-dihydroxyphenoxy)-6-(hydroxymethyl)tetrahydropyran-3,4,5-triol	3.69	269.066	122.3	C12H16O8	NEG	1.14711e+07
N-Lactoyl-Phenylalanine	3.69	236.092	260.5	C12H15NO4	NEG	7.97686e+06
Prunin	3.69	415.102	65.9	C21H22O10	NEG	6.27733e+07
Naratriptan (hydrochloride)	3.69	336.173	126.5	C17H25N3O2S	POS	7.61768e+06
3,5-dihydroxy-7-methoxy-2-(4-methoxyphenyl)chromen-4-one	3.69	315.085	58.3	C17H14O6	POS	3.58736e+07
[(1R,2S,5S,7R,8R,9S,10S,11R,18R)-7-acetoxy-9,18-dihydroxy-12,12-dimethyl-6-methylene-17-oxapentacyclo[7.6.2.15,8.01,11.02,8]octadecan-10-yl] acetate	3.69	433.222	90.6	C24H34O7	NEG	1.42953e+06
1-(4-hydroxy-1,3-dihydroisobenzofuran-1-yl)butane-2,3-diol	3.69	223.096	26.2	C12H16O4	NEG	8.45347e+07
(10R,11R)-10,11-dihydroxy-9-(hydroxymethyl)-1,6a,6b,9,12a-pentamethyl-2-methylene-1,3,4,5,6,6a,7,8,8a,10,11,12,13,14b-tetradecahydropicene-4a-carboxylic acid	3.68	485.325	477.7	C30H46O5	NEG	1.36587e+07
1-Caffeoylquinic acid	3.68	353.086	234.9	C16H18O9	NEG	2.21921e+08
2-(2,6-dimethoxyphenyl)-5,6-dimethoxy-chromen-4-one	3.68	343.116	385.8	C19H18O6	POS	2.52016e+07
2-Methylbenzoic acid	3.68	135.045	313	C8H8O2	NEG	1.14226e+08
methyl (1S,4aS,8S,8aS)-1-methyl-3-oxo-8-[(2S,3R,4S,5S,6R)-3,4,5-trihydroxy-6-(hydroxymethyl)tetrahydropyran-2-yl]oxy-4,4a,8,8a-tetrahydro-1H-pyrano[3,4-c]pyran-5-carboxylate	3.68	403.123	249	C17H24O11	NEG	2.60146e+07
(2S)-2-phenyl-7-[(2S,3R,4S,5S,6R)-3,4,5-trihydroxy-6-(hydroxymethyl)tetrahydropyran-2-yl]oxy-chroman-4-one	3.68	403.135	315.2	C21H22O8	POS	1.01136e+08
6-Hydroxyluteolin 7-glucoside	3.68	465.101	295.6	C21H20O12	POS	2.7271e+07
Syringaldehyde	3.68	183.064	278.3	C9H10O4	POS	4.36287e+07
6-[(2R)-2,3-dihydroxy-3-methyl-butyl]-7-hydroxy-chromen-2-one	3.68	247.094	249.6	C14H16O5	POS	2.89687e+07
7,8-dihydroxy-4-phenyl-chromen-2-one	3.68	253.049	405.5	C15H10O4	NEG	3.03965e+09
3-(5-methoxy-1H-indol-3-yl)propanoic acid	3.68	200.071	366.6	C12H13NO3	NEG	1.77386e+07
3-[4-hydroxy-5-methoxy-2-[(2S,3R,4S,5S,6R)-3,4,5-trihydroxy-6-(hydroxymethyl)tetrahydropyran-2-yl]oxy-phenyl]-2-(2-oxochromen-7-yl)oxy-propanoic acid	3.68	515.118	291.3	C25H26O13	NEG	1.29978e+07
3-[(2S,3R,4S,5R,6R)-3,5-dihydroxy-6-(hydroxymethyl)-4-[(2S,3R,4R,5R,6S)-3,4,5-trihydroxy-6-methyl-tetrahydropyran-2-yl]oxy-tetrahydropyran-2-yl]oxy-5,7-dihydroxy-2-(4-hydroxyphenyl)chromen-4-one	3.68	595.163	248.5	C27H30O15	POS	699756
2-(3,4-dihydroxyphenyl)-5-hydroxy-7-[(2S,3R,4S,5S,6R)-3,4,5-trihydroxy-6-[[(2R,3R,4R,5R,6S)-3,4,5-trihydroxy-6-methyl-tetrahydropyran-2-yl]oxymethyl]tetrahydropyran-2-yl]oxy-chromen-4-one	3.68	595.163	248.5	C27H30O15	POS	699756
5,7-dihydroxy-2-(4-hydroxy-3-methoxy-phenyl)-3-[3,4,5-trihydroxy-6-[[(2R,3R,4R,5R,6S)-3,4,5-trihydroxy-6-methyl-tetrahydropyran-2-yl]oxymethyl]tetrahydropyran-2-yl]oxy-chromen-4-one	3.68	625.174	248	C28H32O16	POS	2.97647e+06
Narcissin	3.68	625.174	248	C28H32O16	POS	2.97647e+06
(1S,4S,13S)-4'-methoxy-3',11-dimethyl-4-[(2S,4S)-4-methyl-5-oxo-tetrahydrofuran-2-yl]spiro[5-azatricyclo[8.3.0.01,5]tridec-10-ene-13,5'-furan]-2',12-dione	3.68	416.205	87.6	C23H29NO6	POS	1.90113e+07
Tetradecanedioic acid	3.68	257.175	230	C14H26O4	NEG	4.4128e+06
Protocatechuic acid ethylester	3.68	181.05	54.6	C9H10O4	NEG	8.38858e+08
2-Ketobutyric acid	3.68	101.024	38	C4H6O3	NEG	5.83916e+07
(3aS,5aS,5bR,9S,11aR,13aR)-9-hydroxy-1-isopropenyl-5b,8,8,11a-tetramethyl-1,2,3,4,5,6,7,7a,9,10,11,11b,12,13,13a,13b-hexadecahydrocyclopenta[a]chrysene-3a,5a-dicarboxylic acid	3.67	485.325	477.7	C30H46O5	NEG	1.36587e+07
Liquiritigenin	3.67	255.065	374.6	C15H12O4	NEG	1.61752e+07
3-(4-hydroxyphenyl)-1-[2-hydroxy-4-[(2S,3R,4S,5R,6R)-3,4,5-trihydroxy-6-(hydroxymethyl)tetrahydropyran-2-yl]oxy-phenyl]propan-1-one	3.67	419.133	267.4	C21H24O9	NEG	3.46328e+07
2-oct-7-enylpentanedioic acid	3.67	241.144	451.7	C13H22O4	NEG	1.4259e+07
3,5,7-trimethoxy-2-phenyl-chromen-4-one	3.67	313.106	346.7	C18H16O5	POS	1.71771e+08
NG 52	3.67	347.135	381.6	C16H19ClN6O	POS	2.38237e+07
3-(2,4-dihydroxy-6-methoxy-phenyl)-1-(4-hydroxyphenyl)propan-1-one	3.67	289.106	341.7	C16H16O5	POS	7.97364e+07
Dethiobiotin	3.67	197.127	303.8	C10H18N2O3	POS	4.32078e+07
3-Amino-4-hydroxybenzoic acid	3.67	154.049	146.6	C7H7NO3	POS	3.37512e+07
4-(Aminomethyl)benzoic acid	3.67	152.069	45.6	C8H9NO2	POS	1.12266e+06
6,8-dihydroxy-9-isopropyl-2,2,4,4-tetramethyl-5-(2-methylpropanoyl)-9H-xanthene-1,3-dione	3.67	413.195	451.7	C24H30O6	NEG	3.02012e+07
[(7R,8R,10R,13S,17R)-17-(3-furyl)-4,4,8,10,13-pentamethyl-3,16-dioxo-6,7,9,11,12,17-hexahydro-5H-cyclopenta[a]phenanthren-7-yl] acetate	3.67	431.219	425.2	C28H34O5	NEG	2.73315e+06
1-(4-hydroxy-2-methoxy-phenyl)-3-(4-hydroxyphenyl)prop-2-en-1-one	3.67	269.081	364.8	C16H14O4	NEG	2.21835e+08
[(1S,2S,4S,5S,6R,10S)-5-hydroxy-10-[(2S,3R,4S,5S,6R)-3,4,5-trihydroxy-6-(hydroxymethyl)tetrahydropyran-2-yl]oxy-3,9-dioxatricyclo[4.4.0.02,4]dec-7-en-2-yl]methyl (E)-3-phenylprop-2-enoate	3.67	491.154	344	C24H28O11	NEG	2.61327e+07
2-(4-hydroxyphenyl)ethyl 2-hydroxy-6-methoxybenzoate	3.67	287.091	338.4	C16H16O5	NEG	1.51033e+08
(2S,3S)-3,5,7-trihydroxy-2-(4-hydroxyphenyl)chroman-4-one	3.67	287.055	324.8	C15H12O6	NEG	5.91174e+07
Pseudolaric Acid B	3.67	431.17	314	C23H28O8	NEG	3.89728e+07
3,5-dihydroxydecanoic acid	3.67	203.128	288.5	C10H20O4	NEG	3.3609e+08
Daphnetin	3.67	177.019	253.4	C9H6O4	NEG	6.04026e+08
Flopropione	3.67	181.05	91.3	C9H10O4	NEG	1.26817e+09
Prolylalanine	3.67	169.096	299.6	C8H14N2O3	POS	2.2781e+06
Decadienedioylcarnitine (Car(10:2-O2))	3.67	342.19	291.2	C17H27NO6	POS	424066
Sinomenine N-oxide	3.67	346.163	211.1	C19H23NO5	POS	2.04008e+06
2-(2-Butoxyethoxy)acetic acid	3.67	175.097	203.8	C8H16O4	NEG	1.21572e+07
Andrographolide	3.67	349.2	92	C20H30O5	NEG	3.07365e+07
(3E,4R)-3-[2-[(1R,4aS,5R,6R,8aS)-6-hydroxy-5-(hydroxymethyl)-5,8a-dimethyl-2-methylene-decalin-1-yl]ethylidene]-4-hydroxy-tetrahydrofuran-2-one	3.67	349.2	92	C20H30O5	NEG	3.07365e+07
7-Hydroxydihydrobotrydial	3.67	327.18	88.9	C17H28O6	NEG	5.99199e+06
Xanthoxyletin	3.66	259.095	358.7	C15H14O4	POS	9.57163e+07
Sph(d18:0)	3.66	302.304	443.3	C18H39NO2	POS	1.6279e+06
Mefenamic acid	3.66	224.106	419	C15H15NO2	POS	2.22583e+06
Propiverine (hydrochloride)	3.66	368.221	405.1	C23H29NO3	POS	8.28809e+06
naphthalene-1,3-diol	3.66	161.059	277.9	C10H8O2	POS	2.40473e+08
(2R)-6-Oxo-2-piperidinecarboxylic acid	3.66	144.065	133.6	C6H9NO3	POS	2.27136e+07
Diacetyl	3.66	87.0436	93.3	C4H6O2	POS	3.65069e+06
Ethyl 3-hydroxybenzoate	3.66	165.055	306.4	C9H10O3	NEG	3.78486e+09
Phthalic acid	3.66	165.019	262.8	C8H6O4	NEG	3.19998e+07
6-methoxy-4-methyl-chromen-2-one	3.66	191.069	90.3	C11H10O3	POS	2.0207e+07
Salicylamide	3.66	136.04	83.6	C7H7NO2	NEG	2.75722e+06
2-Isopropylmalic acid	3.66	175.06	335.2	C7H12O5	NEG	6.89792e+06
Sarcosine	3.66	90.0545	374.8	C3H7NO2	POS	3.32505e+06
N,N-Diethyl-2-aminoethanol	3.66	118.122	292.4	C6H15NO	POS	1.13477e+06
Harmaline	3.66	215.117	221.7	C13H14N2O	POS	3.81822e+06
N-Benzyloxycarbonylglycine	3.66	210.075	190	C10H11NO4	POS	1.25293e+07
Scopine	3.66	156.101	119.4	C8H13NO2	POS	1.77296e+07
2'-Aminoacetophenone	3.66	136.075	57.1	C8H9NO	POS	2.46064e+06
β-Naphthoflavone	3.66	273.095	45.3	C19H12O2	POS	987731
Ligustrazine	3.66	137.107	6.4	C8H12N2	POS	7.70086e+06
(E)-9,10-dihydroxytetradec-6-enedioic acid	3.66	287.149	350.6	C14H24O6	NEG	945289
2-Furoylglycine	3.66	168.03	244.3	C7H7NO4	NEG	497027
Cynarin	3.65	515.118	291.3	C25H24O12	NEG	1.29978e+07
Ethyl 4-hydroxybenzoate	3.65	165.055	306.4	C9H10O3	NEG	3.78486e+09
3,3,5-trimethyl-11H-pyrano[3,2-a]carbazole	3.65	264.137	432.1	C18H17NO	POS	1.21521e+06
2-(6-hydroxy-2-methyl-1,2,4a,5,6,7,8,8a-octahydronaphthalen-1-yl)pyran-4-one	3.65	261.147	364.5	C16H20O3	POS	6.24326e+07
5,7-dihydroxy-2-(4-hydroxy-3-methoxy-phenyl)-3,8-dimethoxy-chromen-4-one	3.65	361.09	315.1	C18H16O8	POS	5.34376e+07
Indoleacetic acid	3.65	176.07	254	C10H9NO2	POS	4.28765e+07
Dopamine	3.65	136.075	81.2	C8H11NO2	POS	537371
(3aS,5R,7S,7aR)-2,7-diacetyloxy-3-formyl-3a-hydroxy-1,1,3,5-tetramethyl-2,4,5,6,7,7a-hexahydroindene-4-carboxylic acid	3.65	383.173	405.6	C19H28O8	NEG	5.96645e+06
(2R,3S,4S,5R,6R)-2-(hydroxymethyl)-6-[3-(4-hydroxy-2,6,6-trimethyl-cyclohexen-1-yl)-1-methyl-propoxy]tetrahydropyran-3,4,5-triol	3.65	373.222	246.9	C19H34O7	NEG	48424.5
3,4-Dihydroxymandelic acid	3.65	183.029	101.1	C8H8O5	NEG	1.18007e+07
Hypaconine	3.65	470.272	253.7	C24H39NO8	POS	592019
Levonordefrin	3.64	166.085	101.9	C9H13NO3	POS	4.089e+07
(Z)-2-hydroxyoctadec-9-enoic acid	3.64	297.242	488.2	C18H34O3	NEG	4.08554e+08
(E)-3-(2,5-dihydroxyphenyl)prop-2-enoic acid	3.64	179.034	261.5	C9H8O4	NEG	3.41128e+09
2-(3,4-dihydroxyphenyl)-5-hydroxy-6,7,8-trimethoxy-chromen-4-one	3.64	361.09	315.1	C18H16O8	POS	5.34376e+07
10-(1,1-dimethylallyl)-5-methoxy-2,2-dimethyl-pyrano[3,2-g]chromen-8-one	3.64	327.157	453.2	C20H22O4	POS	1.70131e+07
Coniferol	3.64	181.085	201.7	C10H12O3	POS	5.6277e+06
1,9b-dihydroxy-6,6,9a-trimethyl-1,5,5a,7,8,9-hexahydrobenzo[e]isobenzofuran-3-one	3.64	265.143	413.7	C15H22O4	NEG	8.14658e+07
(2R,3R,4S,5S,6R)-2-octoxy-6-[[(2S,3R,4S,5R)-3,4,5-trihydroxytetrahydropyran-2-yl]oxymethyl]tetrahydropyran-3,4,5-triol	3.64	405.212	376.9	C19H36O10	NEG	1.72455e+08
Homoplantaginin	3.64	443.097	341.3	C22H22O11	NEG	3.16868e+07
2-(3,4-dihydroxyphenyl)-5,7-dihydroxy-chroman-4-one	3.64	287.055	281.9	C15H12O6	NEG	9.84073e+06
1,7,8-trihydroxy-3-methyl-2,3,4,7-tetrahydro-1H-benzo[a]anthracen-12-one	3.64	291.099	46.2	C19H18O4	NEG	8.99311e+07
1-(3,7-dihydroxy-3-methyl-2-oxatricyclo[7.3.1.05,13]trideca-1(12),5(13),6,8,10-pentaen-6-yl)ethanone	3.63	259.095	358.7	C15H14O4	POS	9.57163e+07
1,4-dihydroxy-6,6,9a-trimethyl-4,5,5a,7,8,9-hexahydro-1H-benzo[e]isobenzofuran-3-one	3.63	265.143	413.7	C15H22O4	NEG	8.14658e+07
(4aR,5S)-9,9a-dihydroxy-3,4a,5-trimethyl-5,6,7,8,8a,9-hexahydro-4H-benzo[f]benzofuran-2-one	3.63	265.143	413.7	C15H22O4	NEG	8.14658e+07
Duroquinone	3.63	165.09	436.2	C10H12O2	POS	2.51063e+06
6-[(2S)-2-hydroxy-3-methyl-but-3-enyl]-5,7-dimethoxy-chromen-2-one	3.63	291.121	305.7	C16H18O5	POS	6.04487e+07
4,7,8-trimethoxy-3,5-dimethyl-chromen-2-one	3.63	265.106	305.4	C14H16O5	POS	6.41285e+07
Hexanoylcarnitine (Car(6:0))	3.63	242.174	278.9	C13H25NO4	POS	1.43615e+06
Corydaldine (tautomeric structure 1)	3.63	208.096	210.8	C11H13NO3	POS	3.18373e+06
2-Methyl-11-oxo-11H-pyrido[2,1-b]quinazoline-6-carboxylic acid	3.63	253.061	356.2	C14H10N2O3	NEG	5.45037e+07
N-(4-Aminobenzoyl)-L-glutamic acid	3.63	265.084	256.7	C12H14N2O5	NEG	3.8434e+07
(1S,4aS,7S,7aR)-7-methyl-1-[(2S,3R,4S,5S,6R)-3,4,5-trihydroxy-6-(hydroxymethyl)tetrahydropyran-2-yl]oxy-1,4a,5,6,7,7a-hexahydrocyclopenta[c]pyran-4-carboxylic acid	3.63	359.134	294.9	C16H24O9	NEG	5.80898e+06
3-[5,7-dihydroxy-2-(4-methoxyphenyl)-4-oxo-chroman-3-yl]-5,7-dihydroxy-2-(4-methoxyphenyl)chroman-4-one	3.63	569.149	95.4	C32H26O10	NEG	9.50282e+07
Homovanillic acid	3.62	181.05	290.6	C9H10O4	NEG	2.61066e+08
(2R,3R,4S,5S,6R)-2-[4-(3-hydroxybutyl)-3,5,5-trimethyl-cyclohex-3-en-1-yl]oxy-6-(hydroxymethyl)tetrahydropyran-3,4,5-triol	3.62	373.222	246.9	C19H34O7	NEG	48424.5
Tetrabenazine	3.62	318.205	368.5	C19H27NO3	POS	1.88188e+06
Neantine	3.62	205.085	331.8	C12H14O4	POS	5.3207e+07
gamma-Glutamylleucine	3.62	243.133	249.6	C11H20N2O5	POS	3.60106e+07
2-Aminopurine	3.62	136.063	42.1	C5H5N5	POS	8.3549e+07
Barbaloin	3.62	417.118	363.2	C21H22O9	NEG	4.48403e+07
Xylose	3.62	131.035	101.4	C5H10O5	NEG	2.0539e+06
4-Aminobenzoic acid	3.62	136.04	83.6	C7H7NO2	NEG	2.75722e+06
1-[8-hydroxy-3-methyl-1-[(2S,3R,4S,5S,6R)-3,4,5-trihydroxy-6-(hydroxymethyl)tetrahydropyran-2-yl]oxy-2-naphthyl]ethanone	3.62	377.122	110.1	C19H22O8	NEG	6.33845e+07
4-Ethoxybenzoic acid	3.62	165.055	105.4	C9H10O3	NEG	8.33299e+10
2-(3,4-dimethoxyphenyl)-3,5,7,8-tetramethoxy-chromen-4-one	3.61	403.135	315.2	C21H22O8	POS	1.01136e+08
Adenine	3.61	136.063	42.1	C5H5N5	POS	8.3549e+07
Testosterone	3.61	289.215	444.8	C19H28O2	POS	1.34635e+07
(3R)-3-hydroxy-5,6,7-trimethoxy-3-[(4-methoxyphenyl)methyl]chroman-4-one	3.61	357.132	415.7	C20H22O7	POS	1.77863e+07
Neoastilbin	3.61	433.111	327.2	C21H22O11	POS	3.53957e+07
4-hydroxy-3,5,6-trimethyl-pyran-2-one	3.61	155.07	201.8	C8H10O3	POS	6.94571e+06
2-(3,4-dimethoxyphenyl)ethanamine	3.61	164.106	192.1	C10H15NO2	POS	1.47595e+07
Pachypodol	3.61	343.081	351.2	C18H16O7	NEG	1.3845e+08
2-hexoxy-6-[(3,4,5-trihydroxytetrahydropyran-2-yl)oxymethyl]tetrahydropyran-3,4,5-triol	3.61	377.181	334.6	C17H32O10	NEG	9.23942e+06
Nodakenin	3.61	389.123	145.8	C20H24O9	NEG	1.09593e+08
2-[5-(2-hydroxypropyl)tetrahydrofuran-2-yl]propanoic acid	3.61	183.102	263.3	C10H18O4	NEG	1.30946e+07
3-[(1E,3E)-hepta-1,3-dienyl]hexanedioic acid	3.6	239.128	420.9	C13H20O4	NEG	1.23538e+08
Saururin A	3.6	357.133	373.7	C20H22O6	NEG	4.07106e+07
Benzyl butyl phthalate	3.6	295.131	413.8	C19H20O4	POS	3.86154e+07
4-(3,4-dihydroxyphenyl)-7-methoxy-5-[(2S,3R,4S,5S,6R)-3,4,5-trihydroxy-6-(hydroxymethyl)tetrahydropyran-2-yl]oxy-chromen-2-one	3.6	445.109	307.7	C22H22O11	POS	2.67148e+07
Dapivirine	3.6	330.17	305.3	C20H19N5	POS	1.13622e+07
5-hydroxy-2-(4-hydroxyphenyl)-7-methoxy-6-[(2S,3R,4R,5S,6R)-3,4,5-trihydroxy-6-(hydroxymethyl)tetrahydropyran-2-yl]chromen-4-one	3.6	445.11	217.1	C22H22O10	NEG	1.20935e+07
3,5,7-trihydroxy-2,6,6,10,14-pentamethyl-11,13-dioxatetracyclo[8.8.0.02,7.012,17]octadec-12(17)-en-16-one	3.6	379.211	73.4	C21H32O6	NEG	3.97809e+07
(2Z,4E)-5-[(1R,3R,5S,8S)-3,8-dihydroxy-1,5-dimethyl-6-oxabicyclo[3.2.1]octan-8-yl]-3-methyl-penta-2,4-dienoic acid	3.59	281.138	287.7	C15H22O5	NEG	1.00967e+07
5,7-Dihydroxychromone	3.59	177.019	253.4	C9H6O4	NEG	6.04026e+08
all-trans-5,6-Epoxyretinoic acid	3.59	317.207	480.1	C20H28O3	POS	2.85761e+07
AG 1295	3.59	235.122	419.4	C16H14N2	POS	2.73126e+06
2,4,5-Trimethoxybenzoic acid	3.59	213.075	284.3	C10H12O5	POS	4.40198e+07
Isovanillin	3.59	151.039	92.1	C8H8O3	NEG	4.71903e+08
7-(3,4-dihydroxyphenyl)-1-(4-hydroxyphenyl)-5-[(2S,3R,4S,5R)-3,4,5-trihydroxytetrahydropyran-2-yl]oxy-heptan-3-one	3.59	463.195	81.5	C24H30O9	POS	3.05973e+07
[(2R,3S,4S,5R,6S)-6-[[(3S,4R,4aR)-4-ethenyl-4a-hydroxy-8-oxo-3,4,5,6-tetrahydropyrano[3,4-c]pyran-3-yl]oxy]-3,4,5-trihydroxyoxan-2-yl]methyl acetate	3.59	415.123	80.7	C18H24O11	NEG	1.28758e+08
3,3-dimethyl-7-oxo-6-[(2-phenoxyacetyl)amino]-4-thia-1-azabicyclo[3.2.0]heptane-2-carboxylic acid	3.59	349.091	33.9	C16H18N2O5S	NEG	8.11122e+07
9-hydroxy-7-isopropyl-1,4a-dimethyl-2,3,4,9,10,10a-hexahydrophenanthrene-1-carboxylic acid	3.58	317.207	480.1	C20H28O3	POS	2.85761e+07
GeloMulideN	3.58	413.194	354.2	C24H32O7	NEG	351486
(1R,4S,8R,9R,12S,13S,16S,19R)-9,19-dihydroxy-7,7-dimethyl-17-methylene-3,10-dioxapentacyclo[14.2.1.01,13.04,12.08,12]nonadecane-2,18-dione	3.58	361.163	304.9	C20H26O6	NEG	5.04939e+07
2,2,6,6-Tetramethyl-4-piperidinyl 2-methylacrylate	3.58	226.179	100.9	C13H23NO2	POS	1.8359e+07
5-methoxy-8,8-dimethyl-2-phenyl-pyrano[2,3-h]chromen-4-one	3.57	335.124	413.8	C21H18O4	POS	2.50443e+08
6-Benzylaminopurine	3.56	208.096	271.2	C12H11N5	POS	5.00632e+07
Fucose	3.56	187.059	102.7	C6H12O5	POS	8.19195e+07
3,5,6,7,3',4'-Hexamethoxyflavone	3.55	403.135	315.2	C21H22O8	POS	1.01136e+08
(5R,10S,13R,14R,17R)-17-[(1R,4S)-4,5-dihydroxy-1,5-dimethyl-hexyl]-4,4,10,13,14-pentamethyl-2,5,6,11,12,15,16,17-octahydro-1H-cyclopenta[a]phenanthrene-3,7-dione	3.55	455.348	494.2	C30H48O4	POS	1.7165e+07
(4-Benzoyloxy-3,5,6-trihydroxycyclohexen-1-yl)methyl benzoate	3.55	367.114	378.1	C21H20O7	POS	5.14167e+07
Semilicoisoflavone B	3.55	353.098	346.2	C20H16O6	POS	5.42152e+07
Pemirolast (potassium)	3.55	229.085	303.1	C10H8N6O	POS	3.91562e+07
(3S)-8-hydroxy-3-methyl-3,4-dihydro-2H-benzo[a]anthracene-1,7,12-trione	3.54	307.093	373.5	C19H14O4	POS	2.46664e+07
(1R,14R)-11,14-dihydroxy-17,18-dimethoxy-7,7-dimethyl-2,8,21-trioxapentacyclo[12.8.0.03,12.04,9.015,20]docosa-3(12),4(9),5,10,15,17,19-heptaen-13-one	3.54	409.125	365.8	C23H22O8	POS	7.19095e+07
3-[(2Z)-3,7-dimethylocta-2,6-dienyl]-2,4-dihydroxy-6-(2-phenylethyl)benzoic acid	3.54	375.193	471.2	C25H30O4	NEG	1.59174e+06
7-hydroxy-6-[(2E,6E)-9-hydroxy-3,7-dimethylnona-2,6-dienyl]-5-methoxy-4-methyl-3H-2-benzofuran-1-one	3.54	359.183	453.4	C21H28O5	NEG	5.81579e+06
Cortisone acetate	3.53	383.182	400.5	C23H30O6	NEG	5.01895e+08
(2R,6R)-2-methyl-4-oxo-6-[(5R,10S,13R,14R,17R)-4,4,10,13,14-pentamethyl-3,7,11,15-tetraoxo-2,5,6,12,16,17-hexahydro-1H-cyclopenta[a]phenanthren-17-yl]heptanoic acid	3.52	493.264	85.5	C30H40O7	NEG	7.45017e+07
7-(1-hydroxy-1-methyl-ethyl)-1,4a-dimethyl-2,3,4,9,10,10a-hexahydrophenanthrene-1-carboxylic acid	3.51	317.207	480.1	C20H28O3	POS	2.85761e+07
4,6-dihydroxy-3-(1-hydroxyethyl)-5-methoxy-3H-isobenzofuran-1-one	3.51	239.059	28.4	C11H12O6	NEG	1.06335e+08
Sulpiride	3.48	342.153	228.8	C15H23N3O4S	POS	5.35746e+06
4-hydroxy-9-(3,4,5-trimethoxyphenyl)-5a,6,8a,9-tetrahydro-5H-isobenzofuro[5,6-f][1,3]benzodioxol-8-one	3.48	413.119	278.1	C22H22O8	NEG	9.27672e+07
[(4E,6E,12E)-3-acetoxytetradeca-4,6,12-trien-8,10-diynyl] acetate	3.47	301.139	470.6	C18H20O4	POS	2.00919e+08
Merafloxacin	3.46	380.183	208.6	C19H23F2N3O3	POS	9.30334e+06
IS5		200.046	206.8	C9H10ClNO2	POS	1.16834e+08
